# Supplementary material for: Identification of a Common Gene Expression Response in Different Lung Inflammatory Diseases in Rodents and Macaques
Source: PLoS One. 2008 Jul 9;3(7):e2596. doi: 10.1371/journal.pone.0002596 (PMC2442866; doi:10.1371/journal.pone.0002596)
Supplement: Dataset S1 — Genes involved in the common up-regulated infection response (0.25 MB DOC) [file pone.0002596.s001.xls]

## Sheet: Up
	Gene	Gene Name	ENTREZ_GENE_SUMMARY	Immune response	Inflammatory response	Cell cycle	Mitotic cell cycle	Jenner & Young	Huang et al	Nau et al	Boldrick et al	Interferon activated	Development
A0001	INDO	INDOLEAMINE-PYRROLE 2,3 DIOXYGENASE	Gamma-interferon (IFNG; MIM 147570) has an antiproliferative effect on many tumor cells and inhibits intracellular pathogens such as Toxoplasma and Chlamydia, at least partly because of the induction of indoleamine 2,3-dioxygenase (INDO; EC 1.13.11.42). This enzyme catalyzes the degradation of the essential amino acid L-tryptophan to N-formylkynurenine.[supplied by OMIM],	1	0	0	0	1	1	1	0	1	0
A0002	MX1	MYXOVIRUS (INFLUENZA VIRUS) RESISTANCE 1, INTERFERON-INDUCIBLE PROTEIN P78 (MOUSE)	In mouse, the interferon-inducible Mx protein is responsible for a specific antiviral state against influenza virus infection. The protein encoded by this gene is similar to the mouse protein as determined by its antigenic relatedness, induction conditions, physicochemical properties, and amino acid analysis. This cytoplasmic protein is a member of both the dynamin family and the family of large …	1	0	0	0	1	1	1	0	1	0
A0003	USP18	UBIQUITIN SPECIFIC PEPTIDASE 18	USP18, a member of the deubiquitinating protease family of enzymes, removes ubiquitin adducts from a broad range of protein substrates.[supplied by OMIM],	0	0	0	0	0	0	0	0	0	0
A0004	ISG20	INTERFERON STIMULATED EXONUCLEASE GENE 20KDA	0	0	0	0	0	1	1	1	0	1	0
A0005	LGALS9	LECTIN, GALACTOSIDE-BINDING, SOLUBLE, 9 (GALECTIN 9)	The galectins are a family of beta-galactoside-binding proteins implicated in modulating cell-cell and cell-matrix interactions. The protein encoded by this gene is an S-type lectin. This galectin is strongly overexpressed in Hodgkin's disease tissue and it might participate in the interaction between the H&RS cells with their surrounding cells and might thus play a role in the pathogenesis of th…	0	0	0	0	1	1	0	0	0	0
A0006	IFIT2	INTERFERON-INDUCED PROTEIN WITH TETRATRICOPEPTIDE REPEATS 2	0	1	0	0	0	1	1	0	0	1	0
A0007	GBP1	GUANYLATE BINDING PROTEIN 1, INTERFERON-INDUCIBLE, 67KDA	Guanylate binding protein expression is induced by interferon. Guanylate binding proteins are characterized by their ability to specifically bind guanine nucleotides (GMP, GDP, and GTP) and are distinguished from the GTP-binding proteins by the presence of 2 binding motifs rather than 3,	1	0	0	0	1	0	1	0	1	0
A0008	IRF7	INTERFERON REGULATORY FACTOR 7	IRF7 encodes interferon regulatory factor 7, a member of the interferon regulatory transcription factor (IRF) family. IRF7 has been shown to play a role in the transcriptional activation of virus-inducible cellular genes, including interferon beta chain genes. Inducible expression of IRF7 is largely restricted to lymphoid tissue. Multiple IRF7 transcript variants have been identified, although th…	1	0	0	0	1	1	0	0	0	0
A0009	TAP1	TRANSPORTER 1, ATP-BINDING CASSETTE, SUB-FAMILY B (MDR/TAP)	The membrane-associated protein encoded by this gene is a member of the superfamily of ATP-binding cassette (ABC) transporters. ABC proteins transport various molecules across extra- and intra-cellular membranes. ABC genes are divided into seven distinct subfamilies (ABC1, MDR/TAP, MRP, ALD, OABP, GCN20, White). This protein is a member of the MDR/TAP subfamily. Members of the MDR/TAP subfamily a…	1	0	0	0	1	1	0	0	0	0
A0010	SLPI	SECRETORY LEUKOCYTE PEPTIDASE INHIBITOR	This gene encodes a secreted inhibitor which protects epithelial tissues from serine proteases. It is found in various secretions including seminal plasma, cervical mucus, and bronchial secretions, and has affinity for trypsin, leukocyte elastase, and cathepsin G. Its inhibitory effect contributes to the immune response by protecting epithelial surfaces from attack by endogenous proteolytic enzym…	0	0	0	0	0	0	0	0	0	0
A0011	LTF	LACTOTRANSFERRIN	With transferrin (MIM 190000) and melanoma tumor antigen p97 (MIM 155750), lactotransferrin belongs to a family of iron-binding proteins that modulate iron metabolism, hemopoiesis, and immunologic reactions. They are evolutionary products of gene duplication, and all 3 are encoded by genes on 3q.[supplied by OMIM],	0	0	0	0	0	0	0	0	0	0
A0012	MUC4	MUCIN 4, TRACHEOBRONCHIAL	The major constituents of mucus, the viscous secretion that covers epithelial surfaces such as those in the trachea, colon, and cervix, are highly glycosylated proteins called mucins. These glycoproteins play important roles in the protection of the epithelial cells and have been implicated in epithelial renewal and differentiation. This gene encodes an integral membrane glycoprotein found on the…	0	0	0	0	0	0	0	0	0	0
A0013	NOS2	NITRIC OXIDE SYNTHASE 2, INDUCIBLE, MACROPHAGE	0	1	1	0	0	0	0	0	0	0	1
A0014	CP	CERULOPLASMIN (FERROXIDASE)	Ceruloplasmin is a plasma metalloprotein that that binds most of the copper in plasma. Human ceruloplasmin is composed of a single polypeptide chain. Ceruloplasmin deficiency leads to iron accumulation and cuases damages to a varieties of tissues and organs.,	0	0	0	0	0	0	0	0	0	0
A0015	CHL1	CELL ADHESION MOLECULE WITH HOMOLOGY TO L1CAM (CLOSE HOMOLOG OF L1)	The protein encoded by this gene is a member of the L1 gene family of neural cell adhesion molecules. It is a neural recognition molecule that may be involved in signal transduction pathways. The deletion of one copy of this gene may be responsible for mental defects in patients with 3p- syndrome. Several alternatively spliced transcript variants of this gene have been described, but their full l…	0	0	0	0	0	0	0	0	0	1
A0016	SFRP1	SECRETED FRIZZLED-RELATED PROTEIN 1	Secreted frizzled-related protein 1 (SFRP1) is a member of the SFRP family that contains a cysteine-rich domain homologous to the putative Wnt-binding site of Frizzled proteins. SFRPs act as soluble modulators of Wnt signaling. SFRP1 and SFRP5 may be involved in determining the polarity of photoreceptor cells in the retina. SFRP1 is expressed in several human tissues, with the highest levels in h…	0	0	0	0	0	0	0	0	0	1
A0017	ALOX12	ARACHIDONATE 12-LIPOXYGENASE	0	0	0	0	0	0	0	0	0	0	0
A0018	AZGP1	ALPHA-2-GLYCOPROTEIN 1, ZINC	0	1	0	0	0	0	0	0	0	0	0
A0019	LY6C	LYMPHOCYTE ANTIGEN 6 COMPLEX, LOCUS C	0	0	0	0	0	0	0	0	0	0	0
A0020	NFE2L1	NUCLEAR FACTOR (ERYTHROID-DERIVED 2)-LIKE 1	0	0	0	0	0	0	0	0	0	0	0
A0021	IFI27	INTERFERON, ALPHA-INDUCIBLE PROTEIN 27	0	0	0	0	0	1	1	0	0	1	1
A0022	CCL5	CHEMOKINE (C-C MOTIF) LIGAND 5	This gene is one of several CC cytokine genes clustered on the q-arm of chromosome 17. Cytokines are a family of secreted proteins involved in immunoregulatory and inflammatory processes. The CC cytokines are proteins characterized by two adjacent cysteines. The cytokine encoded by this gene functions as a chemoattractant for blood monocytes, memory T helper cells and eosinophils. It causes the r…	1	1	0	0	1	1	1	0	0	0
A0023	GZMA	GRANZYME A (GRANZYME 1, CYTOTOXIC T-LYMPHOCYTE-ASSOCIATED SERINE ESTERASE 3)	Cytolytic T lymphocytes (CTL) and natural killer (NK) cells share the remarkable ability to recognize, bind, and lyse specific target cells. They are thought to protect their host by lysing cells bearing on their surface 'nonself' antigens, usually peptides or proteins resulting from infection by intracellular pathogens. The protein described here is a T cell- and natural killer cell-specific ser…	1	0	0	0	0	0	0	0	0	0
A0024	AIF1	ALLOGRAFT INFLAMMATORY FACTOR 1	This gene is induced by cytokines and interferon. Its protein product is thought to be involved in negative regulation of growth of vascular smooth muscle cells, which contributes to the anti-inflammatory response to vessel wall trauma. The gene expresses three transcripts.,	0	0	0	0	0	0	0	0	1	0
A0025	GZMB	GRANZYME B (GRANZYME 2, CYTOTOXIC T-LYMPHOCYTE-ASSOCIATED SERINE ESTERASE 1)	Cytolytic T lymphocytes (CTL) and natural killer (NK) cells share the remarkable ability to recognize, bind, and lyse specific target cells. They are thought to protect their host by lysing cells bearing on their surface 'nonself' antigens, usually peptides or proteins resulting from infection by intracellular pathogens. The protein encoded by this gene is crucial for the rapid induction of targe…	0	0	0	0	0	0	0	0	0	0
A0026	STAT1	SIGNAL TRANSDUCER AND ACTIVATOR OF TRANSCRIPTION 1, 91KDA	The protein encoded by this gene is a member of the STAT protein family. In response to cytokines and growth factors, STAT family members are phosphorylated by the receptor associated kinases, and then form homo- or heterodimers that translocate to the cell nucleus where they act as transcription activators. This protein can be activated by various ligands including interferon-alpha, interferon-g…	0	0	0	0	1	1	0	0	1	0
A0027	DAXX	DEATH-ASSOCIATED PROTEIN 6	0	0	0	0	0	1	1	0	0	0	0
A0028	UBE1L	UBIQUITIN-ACTIVATING ENZYME E1-LIKE	The modification of proteins with ubiquitin is an important cellular mechanism for targeting abnormal or short-lived proteins for degradation. Ubiquitination involves at least three classes of enzymes: ubiquitin-activating enzymes, or E1s, ubiquitin-conjugating enzymes, or E2s, and ubiquitin-protein ligases, or E3s. This gene encodes a member of the E1 ubiquitin-activating enzyme family. The enco…	0	0	0	0	0	0	0	0	0	0
A0029	WARS	INTERFERON-INDUCED PROTEIN 53	Aminoacyl-tRNA synthetases catalyze the aminoacylation of tRNA by their cognate amino acid. Because of their central role in linking amino acids with nucleotide triplets contained in tRNAs, aminoacyl-tRNA synthetases are thought to be among the first proteins that appeared in evolution. Two forms of tryptophanyl-tRNA synthetase exist, a cytoplasmic form, named WARS, and a mitochondrial form, name…	0	0	0	0	1	1	0	0	1	0
A0030	ISGF3G	INTERFERON-STIMULATED TRANSCRIPTION FACTOR 3, GAMMA 48KDA	The protein encoded by this gene contains a RING finger, a motif present in a variety of functionally distinct proteins and known to be involved in protein-DNA and protein-protein interactions.,	1	0	0	0	1	1	0	0	1	0
A0031	IFI35	INTERFERON-INDUCED PROTEIN 35	0	1	0	0	0	1	1	0	0	1	0
A0032	IFITM3	INTERFERON INDUCED TRANSMEMBRANE PROTEIN 3 (1-8U)	0	0	0	0	0	0	0	0	0	1	0
A0033	CSF3R	COLONY STIMULATING FACTOR 3 RECEPTOR (GRANULOCYTE)	The protein encoded by this gene is the receptor for colony stimulating factor 3, a cytokine that controls the production, differentiation, and function of granulocytes. The encoded protein, which is a member of the family of cytokine receptors, may also function in some cell surface adhesion or recognition processes. Four transcript variants encoding four different isoforms have been found for t…	1	1	0	0	0	0	0	0	0	0
A0034	SELL	SELECTIN L (LYMPHOCYTE ADHESION MOLECULE 1)	SELL is a cell surface component that is a member of a family of adhesion/homing receptors which play important roles in leukocyte-endothelial cell interactions. The molecule is composed of multiple domains: one homologous to lectins, one to epidermal growth factor, and two to the consensus repeat units found in C3/C4 binding proteins.,	0	0	0	0	0	0	0	0	0	0
A0035	CASP1	CASPASE 1, APOPTOSIS-RELATED CYSTEINE PEPTIDASE (INTERLEUKIN 1, BETA, CONVERTASE)	This gene encodes a protein which is a member of the cysteine-aspartic acid protease (caspase) family. Sequential activation of caspases plays a central role in the execution-phase of cell apoptosis. Caspases exist as inactive proenzymes which undergo proteolytic processing at conserved aspartic residues to produce 2 subunits, large and small, that dimerize to form the active enzyme. This gene wa…	0	0	0	0	1	0	0	0	0	0
A0036	LAP3	LEUCINE AMINOPEPTIDASE 3	0	0	0	0	0	0	0	0	0	0	0
A0037	UBD	UBIQUITIN D	0	0	0	0	0	0	0	0	0	0	0
A0038	PSMB8	PROTEASOME (PROSOME, MACROPAIN) SUBUNIT, BETA TYPE, 8 (LARGE MULTIFUNCTIONAL PEPTIDASE 7)	The proteasome is a multicatalytic proteinase complex with a highly ordered ring-shaped 20S core structure. The core structure is composed of 4 rings of 28 non-identical subunits; 2 rings are composed of 7 alpha subunits and 2 rings are composed of 7 beta subunits. Proteasomes are distributed throughout eukaryotic cells at a high concentration and cleave peptides in an ATP/ubiquitin-dependent pro…	1	0	0	0	1	1	0	0	1	0
A0039	PSMB9	PROTEASOME (PROSOME, MACROPAIN) SUBUNIT, BETA TYPE, 9 (LARGE MULTIFUNCTIONAL PEPTIDASE 2)	The proteasome is a multicatalytic proteinase complex with a highly ordered ring-shaped 20S core structure. The core structure is composed of 4 rings of 28 non-identical subunits; 2 rings are composed of 7 alpha subunits and 2 rings are composed of 7 beta subunits. Proteasomes are distributed throughout eukaryotic cells at a high concentration and cleave peptides in an ATP/ubiquitin-dependent pro…	1	0	0	0	1	0	0	0	1	0
A0040	PSMB10	PROTEASOME (PROSOME, MACROPAIN) SUBUNIT, BETA TYPE, 10	The proteasome is a multicatalytic proteinase complex with a highly ordered ring-shaped 20S core structure. The core structure is composed of 4 rings of 28 non-identical subunits; 2 rings are composed of 7 alpha subunits and 2 rings are composed of 7 beta subunits. Proteasomes are distributed throughout eukaryotic cells at a high concentration and cleave peptides in an ATP/ubiquitin-dependent pro…	0	0	0	0	1	1	0	0	1	0
A0041	PSME2	PROTEASOME (PROSOME, MACROPAIN) ACTIVATOR SUBUNIT 2 (PA28 BETA)	The 26S proteasome is a multicatalytic proteinase complex with a highly ordered structure composed of 2 complexes, a 20S core and a 19S regulator. The 20S core is composed of 4 rings of 28 non-identical subunits; 2 rings are composed of 7 alpha subunits and 2 rings are composed of 7 beta subunits. The 19S regulator is composed of a base, which contains 6 ATPase subunits and 2 non-ATPase subunits,…	1	0	0	0	1	1	0	0	1	0
A0042	SNX10	SORTING NEXIN 10	This gene encodes a member of the sorting nexin family. Members of this family contain a phox (PX) domain, which is a phosphoinositide binding domain, and are involved in intracellular trafficking. This protein does not contain a coiled coil region, like some family members. This gene encodes a protein whose function has not been determined.,	0	0	0	0	0	0	0	0	0	0
A0043	TLR2	TOLL-LIKE RECEPTOR 2	The protein encoded by this gene is a member of the Toll-like receptor (TLR) family which plays a fundamental role in pathogen recognition and activation of innate immunity. TLRs are highly conserved from Drosophila to humans and share structural and functional similarities. They recognize pathogen-associated molecular patterns (PAMPs) that are expressed on infectious agents, and mediate the prod…	1	1	0	0	0	0	0	0	0	0
A0044	TREX1	THREE PRIME REPAIR EXONUCLEASE 1	This gene uses two different open reading frames. The upstream ORF encodes proteins which interact with the ataxia telangiectasia and Rad3 related protein, a checkpoint kinase. The proteins encoded by this upstream ORF localize to intranuclear foci following DNA damage and are essential components of the DNA damage checkpoint. The downstream ORF encodes proteins with 3' exonuclease activity. Othe…	0	0	0	0	0	0	0	0	0	0
A0045	STAT2	SIGNAL TRANSDUCER AND ACTIVATOR OF TRANSCRIPTION 2, 113KDA	The protein encoded by this gene is a member of the STAT protein family. In response to cytokines and growth factors, STAT family members are phosphorylated by the receptor associated kinases, and then form homo- or heterodimers that translocate to the cell nucleus where they act as transcription activators. In response to interferon (IFN), this protein forms a complex with STAT1 and IFN regulato…	0	0	0	0	0	0	0	0	1	0
A0046	TAP2	TRANSPORTER 2, ATP-BINDING CASSETTE, SUB-FAMILY B (MDR/TAP)	The membrane-associated protein encoded by this gene is a member of the superfamily of ATP-binding cassette (ABC) transporters. ABC proteins transport various molecules across extra- and intra-cellular membranes. ABC genes are divided into seven distinct subfamilies (ABC1, MDR/TAP, MRP, ALD, OABP, GCN20, White). This protein is a member of the MDR/TAP subfamily. Members of the MDR/TAP subfamily a…	1	0	0	0	1	1	0	0	0	0
A0047	SLC7A11	SOLUTE CARRIER FAMILY 7, (CATIONIC AMINO ACID TRANSPORTER, Y+ SYSTEM) MEMBER 11	SLC7A11 is a member of a heteromeric Na(+)-independent anionic amino acid transport system highly specific for cystine and glutamate. In this system, designated system Xc(-), the anionic form of cystine is transported in exchange for glutamate.[supplied by OMIM],	0	0	0	0	0	0	0	0	0	0
A0048	PGLYRP1	PEPTIDOGLYCAN RECOGNITION PROTEIN 1	0	1	0	0	0	0	0	0	0	0	0
A0049	FPRL1	FORMYL PEPTIDE RECEPTOR-LIKE 1	0	0	0	0	0	0	0	0	0	0	0
A0050	SLC28A2	SOLUTE CARRIER FAMILY 28 (SODIUM-COUPLED NUCLEOSIDE TRANSPORTER), MEMBER 2	0	0	0	0	0	0	0	0	0	0	0
B0001	MMP15	MATRIX METALLOPEPTIDASE 15 (MEMBRANE-INSERTED)	Proteins of the matrix metalloproteinase (MMP) family are involved in the breakdown of extracellular matrix in normal physiological processes, such as embryonic development, reproduction, and tissue remodeling, as well as in disease processes, such as arthritis and metastasis. Most MMP's are secreted as inactive proproteins which are activated when cleaved by extracellular proteinases. However, t…	0	0	0	0	0	0	0	0	0	0
B0002	TREM1	TRIGGERING RECEPTOR EXPRESSED ON MYELOID CELLS 1	Monocyte/macrophage- and neutrophil-mediated inflammatory responses can be stimulated through a variety of receptors, including G protein-linked 7-transmembrane receptors (e.g., FPR1; MIM 136537), Fc receptors (see MIM 146790), CD14 (MIM 158120) and Toll-like receptors (e.g., TLR4; MIM 603030), and cytokine receptors (e.g., IFNGR1; MIM 107470). Engagement of these receptors can also prime myeloid…	0	0	0	0	0	0	0	0	0	0
B0003	IL1A	INTERLEUKIN 1, ALPHA	The protein encoded by this gene is a member of the interleukin 1 cytokine family. This cytokine is a pleiotropic cytokine involved in various immune responses, inflammatory processes, and hematopoiesis. This cytokine is produced by monocytes and macrophages as a proprotein, which is proteolytically processed and released in response to cell injury, and thus induces apoptosis. This gene and eight…	1	1	1	0	1	1	0	1	0	0
B0004	MMP8	MATRIX METALLOPEPTIDASE 8 (NEUTROPHIL COLLAGENASE)	Proteins of the matrix metalloproteinase (MMP) family are involved in the breakdown of extracellular matrix in normal physiological processes, such as embryonic development, reproduction, and tissue remodeling, as well as in disease processes, such as arthritis and metastasis. Most MMP's are secreted as inactive proproteins which are activated when cleaved by extracellular proteinases. However, t…	0	0	0	0	0	0	0	0	0	0
B0005	TNF	TUMOR NECROSIS FACTOR (TNF SUPERFAMILY, MEMBER 2)	This gene encodes a multifunctional proinflammatory cytokine that belongs to the tumor necrosis factor (TNF) superfamily. This cytokine is mainly secreted by macrophages. It can bind to, and thus functions through its receptors TNFRSF1A/TNFR1 and TNFRSF1B/TNFBR. This cytokine is involved in the regulation of a wide spectrum of biological processes including cell proliferation, differentiation, ap…	1	1	0	0	1	1	0	1	0	1
B0006	IL1R2	INTERLEUKIN 1 RECEPTOR, TYPE II	The protein encoded by this gene is a cytokine receptor that belongs to the interleukin 1 receptor family. This protein binds interleukin alpha (IL1A), interleukin beta (IL1B), and interleukin 1 receptor, type I(IL1R1/IL1RA), and acts as a decoy receptor that inhibits the activity of its ligands. Interleukin 4 (IL4) is reported to antagonize the activity of interleukin 1 by inducing the expressio…	0	0	0	0	0	0	0	0	0	0
B0007	CCL20	CHEMOKINE (C-C MOTIF) LIGAND 20	0	1	1	0	0	1	1	0	1	0	0
B0008	SERPINE1	SERPIN PEPTIDASE INHIBITOR, CLADE E (NEXIN, PLASMINOGEN ACTIVATOR INHIBITOR TYPE 1), MEMBER 1	0	0	0	0	0	0	0	0	0	0	1
B0009	CCL19	CHEMOKINE (C-C MOTIF) LIGAND 19	This gene is one of several CC cytokine genes clustered on the p-arm of chromosome 9. Cytokines are a family of secreted proteins involved in immunoregulatory and inflammatory processes. The CC cytokines are proteins characterized by two adjacent cysteines. The cytokine encoded by this gene may play a role in normal lymphocyte recirculation and homing. It also plays an important role in trafficki…	1	1	0	0	1	1	0	0	0	0
B0010	CEBPD	CCAAT/ENHANCER BINDING PROTEIN (C/EBP), DELTA	The protein encoded by this intronless gene is a bZIP transcription factor which can bind as a homodimer to certain DNA regulatory regions. It can also form heterodimers with the related protein CEBP-alpha. The encoded protein is important in the regulation of genes involved in immune and inflammatory responses, and may be involved in the regulation of genes associated with activation and/or diff…	0	0	0	0	0	0	0	0	0	0
B0011	IRF1	INTERFERON REGULATORY FACTOR 1	IRF1 encodes interferon regulatory factor 1, a member of the interferon regulatory transcription factor (IRF) family. IRF1 serves as an activator of interferons alpha and beta transcription, and in mouse it has been shown to be required for double-stranded RNA induction of these genes. IRF1 also functions as a transcription activator of genes induced by interferons alpha, beta, and gamma. Further…	1	0	0	0	1	1	1	0	1	0
B0012	EGR2	EARLY GROWTH RESPONSE 2 (KROX-20 HOMOLOG, DROSOPHILA)	The early growth response protein 2 is a transcription factor with three tandem C2H2-type zinc fingers. Mutations in this gene are associated with the autosomal dominant Charcot-Marie-Tooth disease, type 1.,	0	0	0	0	0	0	0	0	0	1
B0013	BIRC3	BACULOVIRAL IAP REPEAT-CONTAINING 3	The protein encoded by this gene is a member of a family of proteins that inhibits apoptosis by binding to tumor necrosis factor receptor-associated factors TRAF1 and TRAF2, probably by interfering with activation of ICE-like proteases. The encoded protein inhibits apoptosis induced by serum deprivation but does not affect apoptosis resulting from exposure to menadione, a potent inducer of free r…	0	0	0	0	1	1	1	1	0	0
B0014	VCAM1	VASCULAR CELL ADHESION MOLECULE 1	This gene is a member of the Ig superfamily and encodes a cell surface sialoglycoprotein expressed by cytokine-activated endothelium. This type I membrane protein mediates leukocyte-endothelial cell adhesion and signal transduction, and may play a role in the development of artherosclerosis and rheumatoid arthritis. Two alternatively spliced transcripts encoding different isoforms have been descr…	0	0	0	0	0	0	0	0	0	0
B0015	TNFAIP2	TUMOR NECROSIS FACTOR, ALPHA-INDUCED PROTEIN 2	This gene was identified as a gene whose expression can be induced by the tumor necrosis factor alpha (TNF) in umbilical vein endothelial cells. The expression of this gene was shown to be induced by retinoic acid in a cell line expressing a oncogenic version of the retinoic acid receptor alpha fusion protein, which suggested that this gene may be a retinoic acid target gene in acute promyelocyti…	0	0	0	0	1	1	1	0	0	1
B0016	ARG2	ARGINASE, TYPE II	Arginase catalyzes the hydrolysis of arginine to ornithine and urea. At least two isoforms of mammalian arginase exists (types I and II) which differ in their tissue distribution, subcellular localization, immunologic crossreactivity and physiologic function. The type II isoform encoded by this gene, is located in the mitochondria and expressed in extra-hepatic tissues, especially kidney. The phy…	0	0	0	0	0	0	0	0	0	0
B0017	SOCS3	SUPPRESSOR OF CYTOKINE SIGNALING 3	This gene encodes a member of the STAT-induced STAT inhibitor (SSI), also known as suppressor of cytokine signaling (SOCS), family. SSI family members are cytokine-inducible negative regulators of cytokine signaling. The expression of this gene is induced by various cytokines, including IL6, IL10, and interferon (IFN)-gamma. The protein encoded by this gene can bind to JAK2 kinase, and inhibit th…	0	0	0	0	0	0	0	0	1	1
B0018	ATF3	ACTIVATING TRANSCRIPTION FACTOR 3	Activating transcription factor 3 is a member of the mammalian activation transcription factor/cAMP responsive element-binding (CREB) protein family of transcription factors. It encodes a protein with a calculated molecular mass of 22 kD. ATF3 represses rather than activates transcription from promoters with ATF binding elements. An alternatively spliced form of ATF3 (ATF3 delta Zip) encodes a tr…	0	0	0	0	1	0	0	0	0	0
B0019	PTX3	PENTRAXIN-RELATED GENE, RAPIDLY INDUCED BY IL-1 BETA	0	0	0	0	0	1	1	1	0	0	0
B0020	TNFAIP3	TUMOR NECROSIS FACTOR, ALPHA-INDUCED PROTEIN 3	This gene was identified as a gene whose expression is rapidly induced by the tumor necrosis factor (TNF). The protein encoded by this gene is a zinc finger protein, and has been shown to inhibit NF-kappa B activation as well as TNF-mediated apoptosis. Knockout studies of a similar gene in mice suggested that this gene is critical for limiting inflammation by terminating TNF-induced NF-kappa B re…	0	0	0	0	1	1	1	1	0	0
B0021	PTGS2	PROSTAGLANDIN-ENDOPEROXIDE SYNTHASE 2 (PROSTAGLANDIN G/H SYNTHASE AND CYCLOOXYGENASE)	Prostaglandin-endoperoxide synthase (PTGS), also known as cyclooxygenase, is the key enzyme in prostaglandin biosynthesis, and acts both as a dioxygenase and as a peroxidase. There are two isozymes of PTGS: a constitutive PTGS1 and an inducible PTGS2, which differ in their regulation of expression and tissue distribution. This gene encodes PTGS2, which shows 86% - 89% amino acid sequence identity…	0	0	0	0	1	1	0	0	0	1
B0022	JUNB	JUN B PROTO-ONCOGENE	0	0	0	1	0	1	0	1	1	0	0
B0023	MAP3K8	MITOGEN-ACTIVATED PROTEIN KINASE KINASE KINASE 8	This gene was identified by its oncogenic transforming activity in cells. The encoded protein is a member of the serine/threonine protein kinase family. This kinase can activate both the MAP kinase and JNK kinase pathways. This kinase was shown to activate IkappaB kinases, and thus induce the nuclear production of NF-kappaB. This kinase was also found to promote the production of TNF-alpha and IL…	0	0	1	0	1	0	0	1	0	0
B0024	CSF3	COLONY STIMULATING FACTOR 3 (GRANULOCYTE)	The protein encoded by this gene is a cytokine that controls the production, differentiation, and function of granulocytes. The active protein is found extracellularly. Three transcript variants encoding three different isoforms have been found for this gene.,	1	0	0	0	1	1	0	1	0	1
B0025	ZFP36	ZINC FINGER PROTEIN 36, C3H TYPE, HOMOLOG (MOUSE)	0	1	1	0	0	1	0	1	1	0	1
B0026	HSPA1A	HEAT SHOCK 70KDA PROTEIN 1A	This intronless gene encodes a 70kDa heat shock protein which is a member of the heat shock protein 70 family. In conjuction with other heat shock proteins, this protein stabilizes existing proteins against aggregation and mediates the folding of newly translated proteins in the cytosol and in organelles. It is also involved in the ubiquitin-proteasome pathway through interaction with the AU-rich…	0	0	0	0	1	1	1	0	0	0
B0027	IL5	INTERLEUKIN 5 (COLONY-STIMULATING FACTOR, EOSINOPHIL)	The protein encoded by this gene is a cytokine that acts as a growth and differentiation factor for both B cells and eosinophils. This cytokine is a main regulator of eosinopoiesis, eosinophil maturation and activation. The elevated production of this cytokine is reported to be related to asthma or hypereosinophilic syndromes. The receptor of this cytokine is a heterodimer, whose beta subunit is …	1	0	0	0	1	0	0	0	0	0
B0028	EREG	EPIREGULIN	Epiregulin is a member of the epidermal growth factor family. Epiregulin can function as a ligand of EGFR (epidermal growth factor receptor), as well as a ligand of most members of the ERBB (v-erb-b2 oncogene homolog) family of tyrosine-kinase receptors.,	0	0	1	0	0	0	0	0	0	1
B0029	TNFSF9	TUMOR NECROSIS FACTOR (LIGAND) SUPERFAMILY, MEMBER 9	The protein encoded by this gene is a cytokine that belongs to the tumor necrosis factor (TNF) ligand family. This cytokine is a ligand for TNFRSF9/4-1BB, which is a costimulatory molecule in T lymphocytes. This cytokine and its receptor are involved in the antigen presentation process, and in the generation of cytotoxic T cells. This cytokine is also shown to be required for the optimal CD8 resp…	1	0	0	0	1	1	1	1	0	0
B0030	ITIH4	INTER-ALPHA (GLOBULIN) INHIBITOR H4 (PLASMA KALLIKREIN-SENSITIVE GLYCOPROTEIN)	0	0	0	0	0	0	0	0	0	0	0
B0031	ADM	ADRENOMEDULLIN	Adrenomedullin, a hypotensive peptide found in human pheochromocytoma, consists of 52 amino acids, has 1 intramolecular disulfide bond, and shows a slight homology with the calcitonin gene-related peptide. It may function as a hormone in circulation control because it is found in blood in a considerable concentration. The precursor, called preproadrenomedullin, is 185 amino acids long. By RNA-blo…	0	0	0	0	1	1	1	0	0	0
B0032	SDC4	SYNDECAN 4 (AMPHIGLYCAN, RYUDOCAN)	The protein encoded by this gene is a transmembrane (type I) heparan sulfate proteoglycan that functions as a receptor in intracellular signaling. The encoded protein is found as a homodimer and is a member of the syndecan proteoglycan family. This gene is found on chromosome 20, while a pseudogene has been found on chromosome 22.,	0	0	0	0	1	1	1	0	0	0
B0033	H3F3B	H3 HISTONE, FAMILY 3A	Histones are basic nuclear proteins that are responsible for the nucleosome structure of the chromosomal fiber in eukaryotes. Two molecules of each of the four core histones (H2A, H2B, H3, and H4) form an octamer, around which approximately 146 bp of DNA is wrapped in repeating units, called nucleosomes. The linker histone, H1, interacts with linker DNA between nucleosomes and functions in the co…	0	0	0	0	0	0	0	0	0	0
B0034	RASD1	RAS, DEXAMETHASONE-INDUCED 1	This gene encodes a Ras-related protein that is stimulated by dexamethasone. The exact function of this gene is unknown, but it may play a role in dexamethasone-induced alterations in cell morphology, growth and cell-extracellular matrix interactions. In addition, studies of a similar rat protein suggest that it functions as as a novel physiologic nitric oxide (NO) effector. The gene product belo…	0	0	0	0	0	0	0	0	0	0
B0035	BTG2	BTG FAMILY, MEMBER 2	The protein encoded by this gene is a member of the BTG/Tob family. This family has structurally related proteins that appear to have antiproliferative properties. This encoded protein is involved in the regulation of the G1/S transition of the cell cycle.,	0	0	0	0	1	1	0	0	0	1
B0036	FOS	V-FOS FBJ MURINE OSTEOSARCOMA VIRAL ONCOGENE HOMOLOG	The Fos gene family consists of 4 members: FOS, FOSB, FOSL1, and FOSL2. These genes encode leucine zipper proteins that can dimerize with proteins of the JUN family, thereby forming the transcription factor complex AP-1. As such, the FOS proteins have been implicated as regulators of cell proliferation, differentiation, and transformation. In some cases, expression of the FOS gene has also been a…	0	0	1	0	0	0	0	0	0	1
B0037	FPR1	FORMYL PEPTIDE RECEPTOR 1	0	0	0	0	0	0	0	0	0	0	0
B0038	AKAP12	A KINASE (PRKA) ANCHOR PROTEIN (GRAVIN) 12	The A-kinase anchor proteins (AKAPs) are a group of structurally diverse proteins, which have the common function of binding to the regulatory subunit of protein kinase A (PKA) and confining the holoenzyme to discrete locations within the cell. This gene encodes a member of the AKAP family. The encoded protein is expressed in endothelial cells, cultured fibroblasts, and osteosarcoma cells. It ass…	0	0	0	0	0	0	0	0	0	0
B0039	CYR61	CYSTEINE-RICH, ANGIOGENIC INDUCER, 61	CYR61 is a secreted, cysteine-rich, heparin-binding protein encoded by a growth factor-inducible immediate-early gene. Acting as an extracellular, matrix-associated signaling molecule, CYR61 promotes the adhesion of endothelial cells through interaction with integrin and augments growth factor-induced DNA synthesis in the same cell type.[supplied by OMIM],	0	0	0	0	0	0	0	0	0	1
B0040	RHOB	RAS HOMOLOG GENE FAMILY, MEMBER B	0	0	0	1	0	1	0	0	0	0	1
B0041	BCL6B	B-CELL CLL/LYMPHOMA 6, MEMBER B (ZINC FINGER PROTEIN)	0	0	0	0	0	0	0	0	0	0	0
B0042	IER2	IMMEDIATE EARLY RESPONSE 2	0	0	0	0	0	1	0	0	0	0	0
B0043	SELE	SELECTIN E (ENDOTHELIAL ADHESION MOLECULE 1)	The endothelial leukocyte adhesion molecule-1 is expressed by cytokine-stimulated endothelial cells. It is thought to be responsible for the accumulation of blood leukocytes at sites of inflammation by mediating the adhesion of cells to the vascular lining. It exhibits structural features such as the presence of lectin- and EGF-like domains followed by short consensus repeat (SCR) domains that co…	0	0	0	0	0	0	0	0	0	0
B0044	MX2	MYXOVIRUS (INFLUENZA VIRUS) RESISTANCE 2 (MOUSE)	The protein encoded by this gene has a nuclear and a cytoplasmic form and is a member of both the dynamin family and the family of large GTPases. The nuclear form is localized in a granular pattern in the heterochromatin region beneath the nuclear envelope. A nuclear localization signal (NLS) is present at the amino terminal end of the nuclear form but is lacking in the cytoplasmic form due to us…	1	0	0	0	1	1	0	0	1	0
B0045	PLSCR1	PHOSPHOLIPID SCRAMBLASE 1	0	0	0	0	0	0	0	0	0	0	1
B0046	CSF1	COLONY STIMULATING FACTOR 1 (MACROPHAGE)	The protein encoded by this gene is a cytokine that controls the production, differentiation, and function of macrophages. The active form of the protein is found extracellularly as a disulfide-linked homodimer, and is thought to be produced by proteolytic cleavage of membrane-bound precursors. The encoded protein may be involved in development of the placenta. Four transcript variants encoding t…	1	0	0	0	1	0	0	1	0	1
B0047	PFKFB3	6-PHOSPHOFRUCTO-2-KINASE/FRUCTOSE-2,6-BIPHOSPHATASE 3	0	0	0	0	0	0	0	0	0	0	0
B0048	CISH	CYTOKINE INDUCIBLE SH2-CONTAINING PROTEIN	The protein encoded by this gene contains a SH2 domain and a SOCS box domain. The protein thus belongs to the cytokine-induced STAT inhibitor (CIS), also known as suppressor of cytokine signaling (SOCS) or STAT-induced STAT inhibitor (SSI), protein family. CIS family members are known to be cytokine-inducible negative regulators of cytokine signaling. The expression of this gene can be induced by…	0	0	0	0	0	0	0	0	0	1
B0049	FOSL2	FOS-LIKE ANTIGEN 2	The Fos gene family consists of 4 members: FOS, FOSB, FOSL1, and FOSL2. These genes encode leucine zipper proteins that can dimerize with proteins of the JUN family, thereby forming the transcription factor complex AP-1. As such, the FOS proteins have been implicated as regulators of cell proliferation, differentiation, and transformation.,	0	0	0	0	1	0	0	0	0	0
B0050	DSCR1	DOWN SYNDROME CRITICAL REGION GENE 1	The protein encoded by this gene interacts with calcineurin A and inhibits calcineurin-dependent signaling pathways, possibly affecting central nervous system development. This gene is located in the minimal candidate region for the Down syndrome phenotype, and is overexpressed in the brain of Down syndrome fetuses. Chronic overexpression of this gene may lead to neurofibrillary tangles such as t…	0	0	0	0	1	0	1	0	0	0
B0051	MAFF	V-MAF MUSCULOAPONEUROTIC FIBROSARCOMA ONCOGENE HOMOLOG F (AVIAN)	The protein encoded by this gene is a basic leucine zipper (bZIP) transcription factor that lacks a transactivation domain. It is known to bind the US-2 DNA element in the promoter of the oxytocin receptor (OTR) gene and most likely heterodimerizes with other leucine zipper-containing proteins to enhance expression of the OTR gene during term pregnancy. The encoded protein can also form homodimer…	0	0	1	0	0	0	0	0	0	1
B0052	GDF15	GROWTH DIFFERENTIATION FACTOR 15	Bone morphogenetic proteins (e.g., BMP5; MIM 112265) are members of the transforming growth factor-beta (see TGFB1; MIM 190180) superfamily and regulate tissue differentiation and maintenance. They are synthesized as precursor molecules that are processed at a dibasic cleavage site to release C-terminal domains containing a characteristic motif of 7 conserved cysteines in the mature protein.[supp…	0	0	0	0	0	0	0	0	0	0
B0053	PHLDA1	PLECKSTRIN HOMOLOGY-LIKE DOMAIN, FAMILY A, MEMBER 1	This gene encodes an evolutionarily conserved proline-histidine rich nuclear protein. The encoded protein may play an important role in the anti-apoptotic effects of insulin-like growth factor-1.,	0	0	0	0	0	0	0	0	0	0
B0054	IL12B	INTERLEUKIN 12B (NATURAL KILLER CELL STIMULATORY FACTOR 2, CYTOTOXIC LYMPHOCYTE MATURATION FACTOR 2, P40)	This gene encodes a subunit of interleukin 12, a cytokine that acts on T and natural killer cells, and has a broad array of biological activities. Interleukin 12 is a disulfide-linked heterodimer composed of the 40 kD cytokine receptor like subunit encoded by this gene, and a 35 kD subunit encoded by IL12A. This cytokine is expressed by activated macrophages that serve as an essential inducer of …	1	0	0	0	1	1	1	0	0	1
B0055	DLL1	DELTA-LIKE 1 (DROSOPHILA)	DLL1 is a human homolog of the Notch Delta ligand and is a member of the delta/serrate/jagged family. It plays a role in mediating cell fate decisions during hematopoiesis. It may play a role in cell-to-cell communication.,	0	0	0	0	0	0	0	0	0	1
B0056	EGR1	EARLY GROWTH RESPONSE 1	The protein encoded by this gene belongs to the EGR family of C2H2-type zinc-finger proteins. It is a nuclear protein and functions as a transcriptional regulator. The products of target genes it activates are required for differentitation and mitogenesis. Studies suggest this is a cancer suppresor gene.,	1	0	0	0	0	0	0	1	0	1
B0057	GEM	GTP BINDING PROTEIN OVEREXPRESSED IN SKELETAL MUSCLE	The protein encoded by this gene belongs to the RAD/GEM family of GTP-binding proteins. It is associated with the inner face of the plasma membrane and could play a role as a regulatory protein in receptor-mediated signal transduction. Alternative splicing occurs at this locus and two transcript variants encoding the same protein have been identified.,	0	0	0	0	1	0	1	0	0	0
B0058	IFRD1	INTERFERON-RELATED DEVELOPMENTAL REGULATOR 1	0	0	0	0	0	1	0	0	0	0	1
B0059	CMKOR1	CHEMOKINE ORPHAN RECEPTOR 1	This gene encodes a member of the G-protein coupled receptor family. Although this protein was earlier thought to be a receptor for vasoactive intestinal peptide (VIP), it is now considered to be an orphan receptor, in that its endogenous ligand has not been identified. The protein is also a coreceptor for human immunodeficiency viruses (HIV). Translocations involving this gene and HMGA2 on chrom…	0	0	0	0	0	0	0	0	0	0
B0060	GADD45A	GROWTH ARREST AND DNA-DAMAGE-INDUCIBLE, ALPHA	This gene is a member of a group of genes whose transcript levels are increased following stressful growth arrest conditions and treatment with DNA-damaging agents. The protein encoded by this gene responds to environmental stresses by mediating activation of the p38/JNK pathway via MTK1/MEKK4 kinase. The DNA damage-induced transcription of this gene is mediated by both p53-dependent and -indepen…	0	0	1	0	1	1	1	0	0	0
B0061	IER3	IMMEDIATE EARLY RESPONSE 3	This gene functions in the protection of cells from Fas- or tumor necrosis factor type alpha-induced apoptosis. Alternative splicing of this gene results in two transcript variants.,	0	0	0	0	1	1	1	0	0	0
B0062	MYD116	MYELOID DIFFERENTIATION PRIMARY RESPONSE GENE 116	0	0	0	0	0	0	0	0	0	0	1
B0063	ADORA2B	ADENOSINE A2B RECEPTOR	This gene encodes an adenosine receptor that is a member of the G protein-coupled receptor superfamily. This integral membrane protein stimulates adenylate cyclase activity in the presence of adenosine. This protein also interacts with netrin-1, which is involved in axon elongation. The gene is located near the Smith-Magenis syndrome region on chromosome 17.,	0	0	0	0	0	0	0	0	0	0
B0064	METTL1	METHYLTRANSFERASE LIKE 1	This gene is an ortholog of the S. cerevisiae YDL201w gene, which is predicted to encode a methyltransferase. The gene product contains a conserved S-adenosylmethionine-binding motif, which is typical of a methyltransferase. Alternative splice variants encoding different protein isoforms and transcript variants utilizing alternative polyA sites have been described in the literature.,	0	0	0	0	0	0	0	0	0	0
B0065	APEX1	APEX NUCLEASE (MULTIFUNCTIONAL DNA REPAIR ENZYME) 1	Apurinic/apyrimidinic (AP) sites occur frequently in DNA molecules by spontaneous hydrolysis, by DNA damaging agents or by DNA glycosylases that remove specific abnormal bases. AP sites are pre-mutagenic lesions that can prevent normal DNA replication so the cell contains systems to identify and repair such sites. Class II AP endonucleases cleave the phosphodiester backbone 5' to the AP site. Thi…	0	0	0	0	0	0	0	0	0	0
B0066	SRM	SPERMIDINE SYNTHASE	The polyamines putrescine, spermine, and spermidine are ubiquitous polycationic mediators of cell growth and differentiation. Spermidine synthase is one of four enzymes in the polyamine-biosynthetic pathway and carries out the final step of spermidine biosynthesis. This enzyme catalyzes the conversion of putrescine to spermidine using decarboxylated S-adenosylmethionine as the cofactor.,	0	0	0	0	0	0	0	0	0	0
B0067	MCM4	MCM4 MINICHROMOSOME MAINTENANCE DEFICIENT 4 (S. CEREVISIAE)	The protein encoded by this gene is one of the highly conserved mini-chromosome maintenance proteins (MCM) that are essential for the initiation of eukaryotic genome replication. The hexameric protein complex formed by MCM proteins is a key component of the pre-replication complex (pre_RC) and may be involved in the formation of replication forks and in the recruitment of other DNA replication re…	0	0	1	0	0	0	0	0	0	0
B0068	GMIP	GEM INTERACTING PROTEIN	0	0	0	0	0	0	0	0	0	0	0
B0069	RBL1	RETINOBLASTOMA-LIKE 1 (P107)	The protein encoded by this gene is similar in sequence and possibly function to the product of the retinoblastoma 1 (RB1) gene. The RB1 gene product is a tumor suppressor protein that appears to be involved in cell cycle regulation, as it is phosphorylated in the S to M phase transition and is dephosphorylated in the G1 phase of the cell cycle. Both the RB1 protein and the product of this gene c…	0	0	1	0	0	0	0	0	0	0
B0070	PRKCD	PROTEIN KINASE C, DELTA	Protein kinase C (PKC) is a family of serine- and threonine-specific protein kinases that can be activated by calcium and the second messenger diacylglycerol. PKC family members phosphorylate a wide variety of protein targets and are known to be involved in diverse cellular signaling pathways. PKC family members also serve as major receptors for phorbol esters, a class of tumor promoters. Each me…	1	0	0	0	0	0	0	0	0	0
B0071	PTGIR	PROSTAGLANDIN I2 (PROSTACYCLIN) RECEPTOR (IP)	The protein encoded by this gene is a member of the G-protein coupled receptor family 1 and has been shown to be a receptor for prostacyclin. Prostacyclin, the major product of cyclooxygenase in macrovascular endothelium, elicits a potent vasodilation and inhibition of platelet aggregation through binding to this receptor.,	0	0	0	0	1	1	0	0	0	0
B0072	SCAMP2	SECRETORY CARRIER MEMBRANE PROTEIN 2	This gene product belongs to the SCAMP family of proteins which are secretory carrier membrane proteins. They function as carriers to the cell surface in post-golgi recycling pathways. Different family members are highly related products of distinct genes, and are usually expressed together. These findings suggest that the SCAMPs may function at the same site during vesicular transport rather tha…	0	0	0	0	0	0	0	0	0	0
B0073	GSPT1	G1 TO S PHASE TRANSITION 1	0	0	0	1	1	0	0	0	0	0	0
B0074	GSR	GLUTATHIONE REDUCTASE	0	0	0	0	0	0	0	0	0	0	0
B0075	CD37	CD37 ANTIGEN	The protein encoded by this gene is a member of the transmembrane 4 superfamily, also known as the tetraspanin family. Most of these members are cell-surface proteins that are characterized by the presence of four hydrophobic domains. The proteins mediate signal transduction events that play a role in the regulation of cell development, activation, growth and motility. This encoded protein is a c…	0	0	0	0	0	0	0	0	0	0
B0076	IL13	INTERLEUKIN 13	This gene encodes an immunoregulatory cytokine produced primarily by activated Th2 cells. This cytokine is involved in several stages of B-cell maturation and differentiation. It up-regulates CD23 and MHC class II expression, and promotes IgE isotype switching of B cells. This cytokine down-regulates macrophage activity, thereby inhibits the production of pro-inflammatory cytokines and chemokines…	1	0	0	0	0	0	0	0	0	0
B0077	ZAP70	ZETA-CHAIN (TCR) ASSOCIATED PROTEIN KINASE 70KDA	0	1	0	0	0	0	0	0	0	0	1
B0078	APBB1IP	AMYLOID BETA (A4) PRECURSOR PROTEIN-BINDING, FAMILY B, MEMBER 1 INTERACTING PROTEIN	0	0	0	0	0	0	0	0	0	0	0
B0079	PIK3CD	PHOSPHOINOSITIDE-3-KINASE, CATALYTIC, DELTA POLYPEPTIDE	Phosphoinositide 3-kinases (PI3Ks) phosphorylate the 3-prime OH position of the inositol ring of inositol lipids. See MIM 602838. The class I PI3Ks display a broad phosphoinositide lipid substrate specificity and include p110-alpha (MIM 171834), p110-beta (MIM 602925), and p110-gamma (MIM 601232). p110-alpha and p110-beta interact with SH2/SH3-domain-containing p85 adaptor proteins (see MIM 17183…	1	0	0	0	0	0	0	0	0	0
B0080	NCF1	NEUTROPHIL CYTOSOLIC FACTOR 1, (CHRONIC GRANULOMATOUS DISEASE, AUTOSOMAL 1)	NCF1 encodes neutrophil cytosolic facter 1, the 47-kilodalton cytosolic subunit of the multi-protein complex known as NADPH oxidase found in neutrophils. This oxidase produces a burst of superoxide which is delivered to the lumen of the neutrophil phagosome. Mutations in NCF1, as well as in other NADPH oxidase subunits, can result in chronic granulomatous disease.,	1	1	0	0	1	1	0	0	0	0
B0081	AK2	ADENYLATE KINASE 2	Adenylate kinases are involved in regulating the adenine nucleotide composition within a cell by catalyzing the reversible transfer of phosphate groups among adenine nucleotides. Three isozymes of adenylate kinase, namely 1, 2, and 3, have been identified in vertebrates; this gene encodes isozyme 2. Expression of these isozymes is tissue-specific and developmentally regulated. Isozyme 2 is locali…	0	0	0	0	0	0	0	0	0	0
B0082	ETV6	ETS VARIANT GENE 6 (TEL ONCOGENE)	This gene encodes an ETS family transcription factor. The product of this gene contains two functional domains: a N-terminal pointed (PNT) domain that is involved in the protein-protein interactions with itself and other proteins, and a C-terminal DNA-binding domain. Gene knockout studies in mice suggest that it is required for hematopoiesis and maintenance of the developing vascular network. Thi…	0	0	1	0	1	0	0	0	0	1
B0083	PIK3CG	PHOSPHOINOSITIDE-3-KINASE, CATALYTIC, GAMMA POLYPEPTIDE	This gene encodes a protein that belongs to the pi3/pi4-kinase family of proteins. The gene product is an enzyme that phosphorylates phosphoinositides on the 3-hydroxyl group of the inositol ring. It is an important modulator of extracellular signals, including those elicited by E-cadherin-mediated cell-cell adhesion, which plays an important role in maintenance of the structural and functional i…	0	0	0	0	0	0	0	0	0	0
B0084	ADAR	ADENOSINE DEAMINASE, RNA-SPECIFIC	This gene encodes the enzyme responsible for RNA editing by site-specific deamination of adenosines. This enzyme destabilizes double stranded RNA through conversion of adenosine to inosine. Mutations in this gene have been associated with dyschromatosis symmetrica hereditaria. Alternate transcriptional splice variants, encoding different isoforms, have been characterized.,	0	0	0	0	0	0	0	0	0	0
B0085	LDH1	LACTATE DEHYDROGENASE A	0	0	0	0	0	0	1	0	0	0	0
B0086	TJP3	TIGHT JUNCTION PROTEIN 3 (ZONA OCCLUDENS 3)	0	0	0	0	0	0	0	0	0	0	0
B0087	CLDN4	CLAUDIN 4	This gene encodes an integral membrane protein, which belongs to the claudin family. The protein is a component of tight junction strands and may play a role in internal organ development and function during pre- and postnatal life. This gene is deleted in Williams-Beuren syndrome, a neurodevelopmental disorder affecting multiple systems.,	0	0	0	0	0	0	0	0	0	0
B0088	ANXA1	ANNEXIN A1	Annexin I belongs to a family of Ca(2+)-dependent phospholipid binding proteins which have a molecular weight of approximately 35,000 to 40,000 and are preferentially located on the cytosolic face of the plasma membrane. Annexin I protein has an apparent relative molecular mass of 40 kDa, with phospholipase A2 inhibitory activity. Since phospholipase A2 is required for the biosynthesis of the pot…	0	0	1	0	0	0	0	0	0	0
B0089	GYK	GLYCEROL KINASE	0	0	0	0	0	0	0	0	0	0	0
B0090	PTGES	PROSTAGLANDIN E SYNTHASE	The protein encoded by this gene is a glutathione-dependent prostaglandin E synthase. The expression of this gene has been shown to be induced by proinflammatory cytokine interleukin 1 beta (IL1B). Its expression can also be induced by tumor suppressor protein TP53, and may be involved in TP53 induced apoptosis. Knockout studies in mice suggest that this gene may contribute to the pathogenesis of…	0	0	0	0	0	0	0	0	0	0
B0091	CYP1B1	CYTOCHROME P450, FAMILY 1, SUBFAMILY B, POLYPEPTIDE 1	This gene encodes a member of the cytochrome P450 superfamily of enzymes. The cytochrome P450 proteins are monooxygenases which catalyze many reactions involved in drug metabolism and synthesis of cholesterol, steroids and other lipids. The enzyme encoded by this gene localizes to the endoplasmic reticulum and metabolizes procarcinogens such as polycyclic aromatic hydrocarbons and 17beta-estradio…	0	0	0	0	0	0	0	0	0	0
B0092	BASP1	BRAIN ABUNDANT, MEMBRANE ATTACHED SIGNAL PROTEIN 1	This gene encodes a membrane bound protein with several transient phosphorylation sites and PEST motifs. Conservation of proteins with PEST sequences among different species supports their functional significance. PEST sequences typically occur in proteins with high turnover rates. Immunological characteristics of this protein are species specific. This protein also undergoes N-terminal myristoyl…	0	0	0	0	0	0	0	0	0	0
B0093	SEMA4D	SEMA DOMAIN, IMMUNOGLOBULIN DOMAIN (IG), TRANSMEMBRANE DOMAIN (TM) AND SHORT CYTOPLASMIC DOMAIN, (SEMAPHORIN) 4D	0	0	0	0	0	0	0	0	0	0	1
B0094	NFKB2	NUCLEAR FACTOR OF KAPPA LIGHT POLYPEPTIDE GENE ENHANCER IN B-CELLS 2 (P49/P100)	NFKB has been detected in numerous cell types that express cytokines, chemokines, growth factors, cell adhesion molecules, and some acute phase proteins in health and in various disease states. NFKB is activated by a wide variety of stimuli such as cytokines, oxidant-free radicals, inhaled particles, ultraviolet irradiation, and bacterial or viral products. Inappropriate activation of NF-kappa-B …	0	0	0	0	1	1	0	1	0	1
B0095	RELB	V-REL RETICULOENDOTHELIOSIS VIRAL ONCOGENE HOMOLOG B, NUCLEAR FACTOR OF KAPPA LIGHT POLYPEPTIDE GENE ENHANCER IN B-CELLS 3 (AVIAN)	0	1	0	1	0	1	1	0	0	0	1
B0096	GCH1	GTP CYCLOHYDROLASE 1 (DOPA-RESPONSIVE DYSTONIA)	This gene encodes a member of the GTP cyclohydrolase family. The encoded protein is the first and rate-limiting enzyme in tetrahydrobiopterin (BH4) biosynthesis, catalyzing the conversion of GTP into 7,8-dihydroneopterin triphosphate. BH4 is an essential cofactor required by aromatic amino acid hydroxylases as well as nitric oxide synthases. Mutations in this gene are associated with malignant hy…	0	0	0	0	1	0	1	0	0	0
B0097	CTPS	CTP SYNTHASE	The catalytic conversion of UTP to CTP is accomplished by the enzyme cytidine-5-prime-triphosphate synthetase. The enzyme is important in the biosynthesis of phospholipids and nucleic acids, and plays a key role in cell growth, development, and tumorigenesis. The region to which the CTPS gene has been mapped is the location of breakpoints involved in several tumor types,	0	0	0	0	0	0	0	0	0	0
B0098	GADD45G	GROWTH ARREST AND DNA-DAMAGE-INDUCIBLE, GAMMA	This gene is a member of a group of genes whose transcript levels are increased following stressful growth arrest conditions and treatment with DNA-damaging agents. The protein encoded by this gene responds to environmental stresses by mediating activation of the p38/JNK pathway via MTK1/MEKK4 kinase. The GADD45G is highly expressed in placenta.,	1	0	1	0	0	0	0	0	0	1
B0099	SLC2A1	SOLUTE CARRIER FAMILY 2 (FACILITATED GLUCOSE TRANSPORTER), MEMBER 1	Glucose transporters are integral membrane glycoproteins involved in transporting glucose into most cells. GLUT1 is a major glucose transporter in the mammalian blood-brain barrier. It is present at high levels in primate erythrocytes and brain endothelial cells.[supplied by OMIM],	0	0	0	0	1	0	0	0	0	0
B0100	SLC9A3R1	SOLUTE CARRIER FAMILY 9 (SODIUM/HYDROGEN EXCHANGER), MEMBER 3 REGULATOR 1	Members of the ezrin (VIL2; MIM 123900)-radixin (RDX; MIM 179410)-moesin (MSN; MIM 309845) (ERM) protein family are highly concentrated in the apical aspect of polarized epithelial cells. These cells are studded with microvilli containing bundles of actin filaments, which must attach to the membrane to assemble and maintain the microvilli. The ERM proteins, together with merlin, the NF2 (MIM 6073…	0	0	0	0	0	0	0	0	0	0
B0101	SPHK1	SPHINGOSINE KINASE 1	Sphingosine-1-phosphate (SPP) is a novel lipid messenger with both intracellular and extracellular functions. Intracellularly, it regulates proliferation and survival, and extracellularly, it is a ligand for EDG1 (MIM 601974). Various stimuli increase cellular levels of SPP by activation of sphingosine kinase (SPHK), the enzyme that catalyzes the phosphorylation of sphingosine. Competitive inhibi…	0	0	0	0	0	0	0	0	0	1
B0102	SOD2	SUPEROXIDE DISMUTASE 2, MITOCHONDRIAL	This gene is a member of the iron/manganese superoxide dismutase family. It encodes a mitochondrial protein that forms a homotetramer and binds one manganese ion per subunit. This protein binds to the superoxide byproducts of oxidative phosphorylation and converts them to hydrogen peroxide and diatomic oxygen. Mutations in this gene have been associated with idiopathic cardiomyopathy (IDC), prema…	1	0	0	0	1	1	1	0	0	0
B0103	TXNRD1	THIOREDOXIN REDUCTASE 1	This gene encodes a member of a family of pyridine nucleotide oxidoreductases. This protein reduces thioredoxins as well as other substrates, and plays a role in selenium metabolism and protection against oxidative stress. The functional enzyme is thought to be a homodimer which uses FAD as a cofactor. Each subunit contains a selenocysteine residue which is required for the catalytic activity. Al…	0	0	0	0	0	0	0	0	0	0
B0104	VARS2	VALYL-TRNA SYNTHETASE 2	0	0	0	0	0	0	0	0	0	0	0
B0105	BHLHB2	BASIC HELIX-LOOP-HELIX DOMAIN CONTAINING, CLASS B, 2	DEC1 encodes a basic helix-loop-helix protein expressed in various tissues. Expression in the chondrocytes is responsive to the addition of Bt2cAMP. Differentiated embryo chondrocyte expressed gene 1 is believed to be involved in the control of cell differentiation.,	0	0	0	0	0	0	0	0	0	0
B0106	P2RY2	PURINERGIC RECEPTOR P2Y, G-PROTEIN COUPLED, 2	The product of this gene belongs to the family of G-protein coupled receptors. This family has several receptor subtypes with different pharmacological selectivity, which overlaps in some cases, for various adenosine and uridine nucleotides. This receptor is responsive to both adenosine and uridine nucleotides. It may participate in control of the cell cycle of endometrial carcinoma cells. Three …	0	0	0	0	0	0	0	0	0	0
B0107	CDKN2D	CYCLIN-DEPENDENT KINASE INHIBITOR 2D (P19, INHIBITS CDK4)	The protein encoded by this gene is a member of the INK4 family of cyclin-dependent kinase inhibitors. This protein has been shown to form a stable complex with CDK4 or CDK6, and prevent the activation of the CDK kinases, thus function as a cell growth regulator that controls cell cycle G1 progression. The abundance of the transcript of this gene was found to oscillate in a cell-cycle dependent m…	0	0	1	0	0	0	0	0	0	0
B0108	PTPN2	PROTEIN TYROSINE PHOSPHATASE, NON-RECEPTOR TYPE 2	The protein encoded by this gene is a member of the protein tyrosine phosphatase (PTP) family. Members of the PTP family share a highly conserved catalytic motif, which is essential for the catalytic activity. PTPs are known to be signaling molecules that regulate a variety of cellular processes including cell growth, differentiation, mitotic cycle, and oncogenic transformation. Epidermal growth …	0	0	0	0	1	0	0	1	0	0
B0109	ADA	ADENOSINE DEAMINASE	Adenosine deaminase catalyzes the hydrolysis of adenosine to inosine. ADA deficiency causes one form of severe combined immunodeficiency disease (SCID), in which there is dysfunction of both B and T lymphocytes with impaired cellular immunity and decreased production of immunoglobulins.,	1	0	0	0	1	0	1	1	0	0
B0110	FGL2	FIBRINOGEN-LIKE 2	Fibrinogen-like 2 is a fibrinogen-like protein similar to the beta- and gamma-chains of fibrinogen. FGL2 carboxyl-terminus consists of the fibrinogen-related domains (FRED). FGL2 forms a tetrameric complex which is stabilized by interchain disulfide bonds. FLG2 may play a role in physiologic functions at mucosal sites.,	0	0	0	0	0	0	0	0	0	0
B0111	HIF1A	HYPOXIA-INDUCIBLE FACTOR 1, ALPHA SUBUNIT (BASIC HELIX-LOOP-HELIX TRANSCRIPTION FACTOR)	Hypoxia-inducible factor-1 (HIF1) is a transcription factor found in mammalian cells cultured under reduced oxygen tension that plays an essential role in cellular and systemic homeostatic responses to hypoxia. HIF1 is a heterodimer composed of an alpha subunit and a beta subunit. The beta subunit has been identified as the aryl hydrocarbon receptor nuclear translocator (ARNT). This gene encodes …	0	0	0	0	1	1	0	0	0	1
B0112	NEK6	NIMA (NEVER IN MITOSIS GENE A)-RELATED KINASE 6	The Aspergillus nidulans 'never in mitosis A' (NIMA) gene encodes a serine/threonine kinase that controls initiation of mitosis. NIMA-related kinases (NEKs) are a group of protein kinases that are homologous to NIMA. Evidence suggests that NEKs perform functions similar to those of NIMA.[supplied by OMIM],	0	0	0	0	0	0	0	0	0	0
B0113	EIF1A	EUKARYOTIC TRANSLATION INITIATION FACTOR 1A	0	0	0	0	0	0	0	0	0	0	0
B0114	RGS4	REGULATOR OF G-PROTEIN SIGNALLING 4	Regulator of G protein signaling (RGS) family members are regulatory molecules that act as GTPase activating proteins (GAPs) for G alpha subunits of heterotrimeric G proteins. RGS proteins are able to deactivate G protein subunits of the Gi alpha, Go alpha and Gq alpha subtypes. They drive G proteins into their inactive GDP-bound forms. Regulator of G protein signaling 4 belongs to this family. A…	0	0	0	0	0	0	0	0	0	0
B0115	CARS	CYSTEINYL-TRNA SYNTHETASE	This gene encodes a class 1 aminoacyl-tRNA synthetase, cysteinyl-tRNA synthetase. Each of the twenty aminoacyl-tRNA synthetases catalyzes the aminoacylation of a specific tRNA or tRNA isoaccepting family with the cognate amino acid. This gene is one of several located near the imprinted gene domain of 11p15.5, an important tumor-suppressor gene region. Alterations in this region have been associa…	0	0	0	0	0	0	0	0	0	0
B0116	MBD1	METHYL-CPG BINDING DOMAIN PROTEIN 1	DNA methylation is the major modification of eukaryotic genomes and plays an essential role in mammalian development. Human proteins MECP2, MBD1, MBD2, MBD3, and MBD4 comprise a family of nuclear proteins related by the presence in each of a methyl-CpG binding domain (MBD). Each of these proteins, with the exception of MBD3, is capable of binding specifically to methylated DNA. MECP2, MBD1 and MB…	0	0	0	0	0	0	0	0	0	1
B0117	ATF4	ACTIVATING TRANSCRIPTION FACTOR 4 (TAX-RESPONSIVE ENHANCER ELEMENT B67)	This gene encodes a transcription factor that was originally identified as a widely expressed mammalian DNA binding protein that could bind a tax-responsive enhancer element in the LTR of HTLV-1. The encoded protein was also isolated and characterized as the cAMP-response element binding protein 2 (CREB-2). The protein encoded by this gene belongs to a family of DNA-binding proteins that includes…	0	0	0	0	1	1	0	0	0	0
B0118	FGG	FIBRINOGEN GAMMA CHAIN	The protein encoded by this gene is the gamma component of fibrinogen, a blood-borne glycoprotein comprised of three pairs of nonidentical polypeptide chains. Following vascular injury, fibrinogen is cleaved by thrombin to form fibrin which is the most abundant component of blood clots. In addition, various cleavage products of fibrinogen and fibrin regulate cell adhesion and spreading, display v…	0	0	0	0	0	0	0	0	0	0
B0119	WSB1	WD REPEAT AND SOCS BOX-CONTAINING 1	This gene encodes a member of the WD-protein subfamily. This protein shares a high sequence identity to mouse and chick proteins. It contains several WD-repeats spanning most of the protein and an SOCS box in the C-terminus. Alternative splicing of this gene generates three transcript variants that encode distinct isoforms.,	0	0	0	0	0	0	0	0	0	0
B0120	FPGS	FOLYLPOLYGLUTAMATE SYNTHASE	This gene encodes the folylpolyglutamate synthetase enzyme. This enzyme has a central role in establishing and maintaining both cytosolic and mitochondrial folylpolyglutamate concentrations and, therefore, is essential for folate homeostasis and the survival of proliferating cells. This enzyme catalyzes the ATP-dependent addition of glutamate moieties to folate and folate derivatives. While sever…	0	0	0	0	0	0	0	0	0	0
B0121	ABCC1	ATP-BINDING CASSETTE, SUB-FAMILY C (CFTR/MRP), MEMBER 1	The protein encoded by this gene is a member of the superfamily of ATP-binding cassette (ABC) transporters. ABC proteins transport various molecules across extra-and intra-cellular membranes. ABC genes are divided into seven distinct subfamilies (ABC1, MDR/TAP, MRP, ALD, OABP, GCN20, White). This full transporter is a member of the MRP subfamily which is involved in multi-drug resistance. This pr…	0	0	0	0	0	0	0	0	0	0
B0122	AKP2	ALKALINE PHOSPHATASE 2, LIVER	0	0	0	0	0	0	0	0	0	0	0
B0123	INHBB	INHIBIN, BETA B (ACTIVIN AB BETA POLYPEPTIDE)	The inhibin beta B subunit joins the alpha subunit to form a pituitary FSH secretion inhibitor. Inhibin has been shown to regulate gonadal stromal cell proliferation negatively and to have tumour-suppressor activity. In addition, serum levels of inhibin have been shown to reflect the size of granulosa-cell tumors and can therefore be used as a marker for primary as well as recurrent disease. Beca…	1	0	0	0	0	0	0	0	0	1
B0124	EPHA2	EPH RECEPTOR A2	This gene belongs to the ephrin receptor subfamily of the protein-tyrosine kinase family. EPH and EPH-related receptors have been implicated in mediating developmental events, particularly in the nervous system. Receptors in the EPH subfamily typically have a single kinase domain and an extracellular region containing a Cys-rich domain and 2 fibronectin type III repeats. The ephrin receptors are …	0	0	0	0	0	0	0	0	0	1
B0125	PPP1R10	PROTEIN PHOSPHATASE 1, REGULATORY SUBUNIT 10	This gene encodes a protein with similarity to a rat protein that has an inhibitory effect on protein phosphatase-1 (PP1). The rat protein localizes to the nucleus and colocalizes with chromatin at distinct phases during mitosis. This gene lies within the major histocompatibility complex class I region on chromosome 6.,	0	0	0	0	0	0	0	0	0	0
B0126	DUSP16	DUAL SPECIFICITY PHOSPHATASE 16	The activation of mitogen-activated protein kinase (MAPK) cascades transduces various extracellular signals to the nucleus to induce gene expression, cell proliferation, differentiation, cell cycle arrest, and apoptosis. For full activation of MAPKs, dual-specificity kinases phosphorylate both threonine and tyrosine residues in MAPK TXY motifs. MKPs are dual-specificity phosphatases that dephosph…	0	0	0	0	0	0	0	0	0	0
B0127	SGK	SERUM/GLUCOCORTICOID REGULATED KINASE	This gene encodes a serine/threonine protein kinase that is highly similar to the rat serum-and glucocorticoid-induced protein kinase (SGK). This gene was identified in a screen of hepatocellular genes regulated in response to cellular hydration or swelling. Cellular hydration is a catabolic signal, stimulating glycogenolysis and proteolysis, and inhibiting protein and glycogen synthesis. This ki…	0	0	0	0	0	0	0	0	0	0
B0128	LAMA5	LAMININ, ALPHA 5	Components of the extracellular matrix exert myriad effects on tissues throughout the body. In particular, the laminins, a family of heterotrimeric extracellular glycoproteins, affect tissue development and integrity in such diverse organs as the kidney, lung, skin, and nervous system. It is thought that laminins mediate the attachment, migration, and organization of cells into tissues during emb…	0	0	0	0	0	0	0	0	0	1
B0129	SQSTM1	SEQUESTOSOME 1	0	1	0	0	0	0	0	0	0	0	1
B0130	B4GALT1	UDP-GAL:BETAGLCNAC BETA 1,4- GALACTOSYLTRANSFERASE, POLYPEPTIDE 1	This gene is one of seven beta-1,4-galactosyltransferase (beta4GalT) genes. They encode type II membrane-bound glycoproteins that appear to have exclusive specificity for the donor substrate UDP-galactose; all transfer galactose in a beta1,4 linkage to similar acceptor sugars: GlcNAc, Glc, and Xyl. Each beta4GalT has a distinct function in the biosynthesis of different glycoconjugates and sacchar…	0	0	0	0	1	0	0	0	0	1
B0131	PLAT	PLASMINOGEN ACTIVATOR, TISSUE	This gene encodes tissue-type plasminogen activator, a secreted serine protease which converts the proenzyme plasminogen to plasmin, a fibrinolytic enzyme. Tissue-type plasminogen activator is synthesized as a single chain which is cleaved by plasmin to a two chain disulfide linked protein. This enzyme plays a role in cell migration and tissue remodeling. Increased enzymatic activity causes hyper…	0	0	0	0	0	0	0	0	0	0
B0132	FOSL1	FOS-LIKE ANTIGEN 1	The Fos gene family consists of 4 members: FOS, FOSB, FOSL1, and FOSL2. These genes encode leucine zipper proteins that can dimerize with proteins of the JUN family, thereby forming the transcription factor complex AP-1. As such, the FOS proteins have been implicated as regulators of cell proliferation, differentiation, and transformation.,	0	0	0	0	0	0	0	0	0	0
B0133	MAT1A	METHIONINE ADENOSYLTRANSFERASE I, ALPHA	This gne encodes methionine adenosyltransferase I (alpha isoform), which catalyzes the formation of S-adenosylmethionine from methionine and ATP. Methionine adenosyltransferase deficiency is caused by recessive and dominant mutations, the latter identified in autosomal dominant persistant hypermethioninemia.,	0	0	0	0	0	0	0	0	0	0
B0134	VNN3	VANIN 3	This gene product is a member of the Vanin family of proteins which share extensive sequence similarity with each other, and also with biotinidase. The family includes secreted and membrane-associated proteins, a few of which have been reported to participate in hematopoietic cell trafficking. No biotinidase activity has been demonstrated for any of the vanin proteins, however, they possess pante…	0	0	0	0	0	0	0	0	0	0
B0135	IL15	INTERLEUKIN 15	The protein encoded by this gene is a cytokine that regulates T and natural killer cell activation and proliferation. This cytokine and interleukine 2 share many biological activities. They are found to bind common hematopoietin receptor subunits, and may compete for the same receptor, and thus negatively regulate each other's activity. The number of CD8+ memory cells is shown to be controlled by…	1	0	0	0	1	0	0	0	0	1
B0136	TNFAIP6	TUMOR NECROSIS FACTOR, ALPHA-INDUCED PROTEIN 6	The protein encoded by this gene is a secretory protein that contains a hyaluronan-binding domain, and thus is a member of the hyaluronan-binding protein family. The hyaluronan-binding domain is known to be involved in extracellular matrix stability and cell migration. This protein has been shown to form a stable complex with inter-alpha-inhibitor (I alpha I), and thus enhance the serine protease…	0	0	0	0	1	1	1	1	0	0
B0137	TBK1	TANK-BINDING KINASE 1	The NF-kappa-B (NFKB) complex of proteins is inhibited by I-kappa-B (IKB) proteins, which inactivate NFKB by trapping it in the cytoplasm. Phosphorylation of serine residues on the IKB proteins by IKB kinases marks them for destruction via the ubiquitination pathway, thereby allowing activation and nuclear translocation of the NFKB complex. The protein encoded by this gene is similar to IKB kinas…	1	0	0	0	0	0	0	0	0	0
B0138	AZI2	5-AZACYTIDINE INDUCED 2	0	0	0	0	0	0	0	0	0	0	0
B0139	MAFK	V-MAF MUSCULOAPONEUROTIC FIBROSARCOMA ONCOGENE HOMOLOG K (AVIAN)	The developmentally regulated expression of the globin genes depends on upstream regulatory elements termed locus control regions (LCRs). LCRs are associated with powerful enhancer activity that is mediated by the transcription factor NFE2 (nuclear factor erythroid-2). NFE2 recognition sites are also present in the gene promoters of 2 heme biosynthetic enzymes, porphobilinogen deaminase (PBGD; MI…	0	0	1	0	0	0	0	0	0	0
B0140	IL15RA	INTERLEUKIN 15 RECEPTOR, ALPHA	The protein encoded by this gene is a cytokine receptor that specifically binds IL15 with high affinity. The receptors of IL15 and IL2 share two subunits, the IL2R beta and IL2R gamma chains. This forms the basis of many overlapping biological activities of IL15 and IL2. The IL2 receptor requires an additional IL2-specific alpha subunit for high affinity IL2 binding. This protein is structurally …	0	0	0	0	1	1	1	1	0	0
B0141	PML	PROMYELOCYTIC LEUKEMIA	The protein encoded by this gene is a member of the tripartite motif (TRIM) family. The TRIM motif includes three zinc-binding domains, a RING, a B-box type 1 and a B-box type 2, and a coiled-coil region. This phosphoprotein localizes to nuclear bodies where it functions as a transcription factor and tumor suppressor. Its expression is cell-cycle related and it regulates the p53 response to oncog…	0	0	0	0	1	1	0	0	0	0
B0142	PTPN23	PROTEIN TYROSINE PHOSPHATASE, NON-RECEPTOR TYPE 23	0	0	0	0	0	0	0	0	0	0	0
B0143	PSTPIP2	PROLINE-SERINE-THREONINE PHOSPHATASE INTERACTING PROTEIN 2	0	0	0	0	0	0	0	0	0	0	0
B0144	NFKBIB	NUCLEAR FACTOR OF KAPPA LIGHT POLYPEPTIDE GENE ENHANCER IN B-CELLS INHIBITOR, BETA	NFKB1 (MIM 164011) or NFKB2 (MIM 164012) is bound to REL (MIM 164910), RELA (MIM 164014), or RELB (MIM 604758) to form the NFKB complex. The NFKB complex is inhibited by I-kappa-B proteins (NFKBIA, MIM 164008, or NFKBIB), which inactivate NF-kappa-B by trapping it in the cytoplasm. Phosphorylation of serine residues on the I-kappa-B proteins by kinases (IKBKA, MIM 600664 or IKBKB, MIM 603258) mar…	0	0	0	0	1	0	0	0	0	0
B0145	EHD1	EH-DOMAIN CONTAINING 1	This gene belongs to a highly conserved gene family encoding EPS15 homology (EH) domain-containing proteins. The protein-binding EH domain was first noted in EPS15, a substrate for the epidermal growth factor receptor. The EH domain has been shown to be an important motif in proteins involved in protein-protein interactions and in intracellular sorting. The protein encoded by this gene is thought…	0	0	0	0	0	0	0	0	0	0
B0146	FGA	FIBRINOGEN ALPHA CHAIN	The protein encoded by this gene is the alpha component of fibrinogen, a blood-borne glycoprotein comprised of three pairs of nonidentical polypeptide chains. Following vascular injury, fibrinogen is cleaved by thrombin to form fibrin which is the most abundant component of blood clots. In addition, various cleavage products of fibrinogen and fibrin regulate cell adhesion and spreading, display v…	0	0	0	0	0	0	0	0	0	0
B0147	ATP2A2	ATPASE, CA++ TRANSPORTING, CARDIAC MUSCLE, SLOW TWITCH 2	This gene encodes one of the SERCA Ca(2+)-ATPases, which are intracellular pumps located in the sarcoplasmic or endoplasmic reticula of muscle cells. This enzyme catalyzes the hydrolysis of ATP coupled with the translocation of calcium from the cytosol to the sarcoplasmic reticulum lumen, and is involved in regulation of the contraction/relaxation cycle. Mutations in this gene cause Darier-White …	0	0	0	0	0	0	0	0	0	0
B0148	IKBKE	INHIBITOR OF KAPPA LIGHT POLYPEPTIDE GENE ENHANCER IN B-CELLS, KINASE EPSILON	0	0	0	0	0	0	0	0	0	0	0
B0149	C5R1	COMPLEMENT COMPONENT 5, RECEPTOR 1	0	0	0	0	0	0	0	0	0	0	0
B0150	TAPBP	TAP BINDING PROTEIN (TAPASIN)	This gene encodes a transmembrane glycoprotein which mediates interaction between newly assembled major histocompatibility complex (MHC) class I molecules and the transporter associated with antigen processing (TAP), which is required for the transport of antigenic peptides across the endoplasmic reticulum membrane. This interaction is essential for optimal peptide loading on the MHC class I mole…	1	0	0	0	0	0	0	0	0	0
B0151	BCL2L11	BCL2-LIKE 11 (APOPTOSIS FACILITATOR)	The protein encoded by this gene belongs to the BCL-2 protein family. BCL-2 family members form hetero- or homodimers and act as anti- or pro-apoptotic regulators that are involved in a wide variety of cellular activities. The protein encoded by this gene contains a Bcl-2 homology domain 3 (BH3). It has been shown to interact with other members of the BCL-2 protein family, including BCL2, BCL2L1/…	0	0	0	0	0	0	0	0	0	0
B0152	PRDX5	PEROXIREDOXIN 5	This gene encodes a member of the peroxiredoxin family of antioxidant enzymes, which reduce hydrogen peroxide and alkyl hydroperoxides. The encoded protein may play an antioxidant protective role in different tissues under normal conditions and during inflammatory processes. This protein interacts with peroxisome receptor 1. The crystal structure of this protein in its reduced form has been resol…	0	0	0	0	0	0	0	0	0	0
B0153	REL	V-REL RETICULOENDOTHELIOSIS VIRAL ONCOGENE HOMOLOG (AVIAN)	0	1	0	1	0	1	0	0	1	0	0
B0154	EBI3	EPSTEIN-BARR VIRUS INDUCED GENE 3	This gene was identified by the induction of its expression in B lymphocytes by Epstein-Barr virus infection. The protein encoded by this gene is a secreted glycoprotein, which is a member of the hematopoietin receptor family related to the p40 subunit of interleukin 12 (IL-12). It might play a role in regulating cell-mediated immune responses.,	0	0	0	0	1	1	1	0	0	0
B0155	HMGA1	HIGH MOBILITY GROUP AT-HOOK 1	This gene encodes a non-histone protein involved in many cellular processes, including regulation of inducible gene transcription, integration of retroviruses into chromosomes, and the metastatic progression of cancer cells. The encoded protein preferentially binds to the minor groove of A+T-rich regions in double-stranded DNA. It has little secondary structure in solution but assumes distinct co…	0	0	0	0	0	0	0	0	0	0
B0156	PLEC1	PLECTIN 1, INTERMEDIATE FILAMENT BINDING PROTEIN 500KDA	The product of this gene belongs to the plakin or cytolinker family of genes. The encoded protein is involved in cytoskeleton-membrane attachment in epithelial cells, muscle, and other tissues. It also may regulate changes of lymphocyte cytoarchitecture during polarization and extravasation. This gene has alternative splicing of different 5' exons to the first constant exon, which generates trans…	0	0	0	0	0	0	0	0	0	0
B0157	AMPD3	ADENOSINE MONOPHOSPHATE DEAMINASE (ISOFORM E)	This gene encodes a member of the AMP deaminase gene family. The encoded protein is a highly regulated enzyme that catalyzes the hydrolytic deamination of adenosine monophosphate to inosine monophosphate, a branch point in the adenylate catabolic pathway. This gene encodes the erythrocyte (E) isoforms, whereas other family members encode isoforms that predominate in muscle (M) and liver (L) cells…	0	0	0	0	1	0	1	0	0	0
B0158	IL4RA	INTERLEUKIN 4 RECEPTOR, ALPHA	0	1	0	0	0	0	0	0	0	0	0
B0159	GRINA	GLUTAMATE RECEPTOR, IONOTROPIC, N-METHYL D-ASPARATE-ASSOCIATED PROTEIN 1 (GLUTAMATE BINDING)	0	0	0	0	0	0	0	0	0	0	0
B0160	IL17R	INTERLEUKIN 17 RECEPTOR	Interleukin 17 is known to induce nuclear factor kappa-B and enhance expression of interleukin 6, intercellular adhesion molecule-1, granulocyte macrophage colony-stimulating factor, and prostaglandin E2. In addition, interleukin 17 induces the maturation of CD34-positive hematopoietic precursors into neutrophils. The protein encoded by this gene is a type I membrane glycoprotein which binds with…	0	0	0	0	0	0	0	0	0	0
B0161	BDKRB1	BRADYKININ RECEPTOR B1	Bradykinin, a 9 aa peptide, is generated in pathophysiologic conditions such as inflammation, trauma, burns, shock, and allergy. Two types of G-protein coupled receptors have been found which bind bradykinin and mediate responses to these pathophysiologic conditions. The protein encoded by this gene is one of these receptors and is synthesized de novo following tissue injury. Receptor binding lea…	0	0	0	0	0	0	0	0	0	0
B0162	CD80	CD80 ANTIGEN (CD28 ANTIGEN LIGAND 1, B7-1 ANTIGEN)	The B-lymphocyte activation antigen B7-1 (formerly referred to as B7) provides regulatory signals for T lymphocytes as a consequence of binding to the CD28 (MIM 186760) and CTLA4 (MIM 123890) ligands of T cells.[supplied by OMIM],	1	0	0	0	1	0	0	0	0	0
B0163	PROCR	PROTEIN C RECEPTOR, ENDOTHELIAL (EPCR)	The protein encoded by this gene is a receptor for activated protein C, a serine protease activated by and involved in the blood coagulation pathway. The encoded protein is an N-glycosylated type I membrane protein that enhances the activation of protein C. Mutations in this gene have been associated with venous thromboembolism and myocardial infarction, as well as with late fetal loss during pre…	0	0	0	0	0	0	0	0	0	0
B0164	MAPK13	MITOGEN-ACTIVATED PROTEIN KINASE 13	The protein encoded by this gene is a member of the MAP kinase family. MAP kinases act as an integration point for multiple biochemical signals, and are involved in a wide variety of cellular processes such as proliferation, differentiation, transcription regulation and development. This kinase is closely related to p38 MAP kinase, both of which can be activated by proinflammatory cytokines and c…	0	0	1	0	0	0	0	0	0	0
B0165	RGS16	REGULATOR OF G-PROTEIN SIGNALLING 16	The protein encoded by this gene belongs to the 'regulator of G protein signaling' family. It inhibits signal transduction by increasing the GTPase activity of G protein alpha subunits. It also may play a role in regulating the kinetics of signaling in the phototransduction cascade.,	0	0	0	0	1	0	0	1	0	0
B0166	OSMR	ONCOSTATIN M RECEPTOR	Oncostatin M is a member of the IL6 family of cytokines. Functional receptors for IL6 family cytokines are multisubunit complexes involving members of the hematopoietin receptor superfamily. Many IL6 cytokines utilize gp130 as a common receptor subunit. OSM binds to the gp130 receptor subunit and, in association with the leukemia inhibitory factor receptor, induces a proliferative response in per…	0	0	0	0	0	0	0	0	0	0
B0167	PLAUR	PLASMINOGEN ACTIVATOR, UROKINASE RECEPTOR	This gene encodes the receptor for urokinase plasminogen activator and, given its role in localizing and promoting plasmin formation, likely influences many normal and pathological processes related to cell-surface plasminogen activation and localized degradation of the extracellular matrix. It binds both the proprotein and mature forms of urokinase plasminogen activator and permits the activatio…	0	0	0	0	1	1	1	0	0	0
B0168	CEBPB	CCAAT/ENHANCER BINDING PROTEIN (C/EBP), BETA	The protein encoded by this intronless gene is a bZIP transcription factor which can bind as a homodimer to certain DNA regulatory regions. It can also form heterodimers with the related proteins CEBP-alpha, CEBP-delta, and CEBP-gamma. The encoded protein is important in the regulation of genes involved in immune and inflammatory responses and has been shown to bind to the IL-1 response element i…	1	0	0	0	0	0	0	0	0	1
B0169	TGM2	TRANSGLUTAMINASE 2 (C POLYPEPTIDE, PROTEIN-GLUTAMINE-GAMMA-GLUTAMYLTRANSFERASE)	Transglutaminases are enzymes that catalyze the crosslinking of proteins by epsilon-gamma glutamyl lysine isopeptide bonds. While the primary structure of transglutaminases is not conserved, they all have the same amino acid sequence at their active sites and their activity is calcium-dependent. The protein encoded by this gene acts as a monomer, is induced by retinoic acid, and appears to be inv…	0	0	0	0	0	0	0	0	0	0
B0170	DCK	DEOXYCYTIDINE KINASE	Deoxycytidine kinase (DCK) is required for the phosphorylation of several deoxyribonucleosides and their nucleoside analogs. Deficiency of DCK is associated with resistance to antiviral and anticancer chemotherapeutic agents. Conversely, increased deoxycytidine kinase activity is associated with increased activation of these compounds to cytotoxic nucleoside triphosphate derivatives. DCK is clini…	0	0	0	0	0	0	0	0	0	0
B0171	MYD88	MYELOID DIFFERENTIATION PRIMARY RESPONSE GENE (88)	0	1	1	0	0	1	1	0	0	0	0
B0172	MMP9	MATRIX METALLOPEPTIDASE 9 (GELATINASE B, 92KDA GELATINASE, 92KDA TYPE IV COLLAGENASE)	Proteins of the matrix metalloproteinase (MMP) family are involved in the breakdown of extracellular matrix in normal physiological processes, such as embryonic development, reproduction, and tissue remodeling, as well as in disease processes, such as arthritis and metastasis. Most MMP's are secreted as inactive proproteins which are activated when cleaved by extracellular proteinases. The enzyme…	0	0	0	0	0	1	0	0	0	0
B0173	UPP1	URIDINE PHOSPHORYLASE 1	0	0	0	0	0	1	0	0	0	0	0
B0174	TPD52	TUMOR PROTEIN D52	0	0	0	0	0	0	0	0	0	0	0
B0175	JAK2	JANUS KINASE 2 (A PROTEIN TYROSINE KINASE)	This gene product is a protein tyrosine kinase involved in a specific subset of cytokine receptor signaling pathways. It has been found to be constituitively associated with the prolactin receptor and is required for responses to gamma interferon. Mice that do not express an active protein for this gene exhibit embryonic lethality associated with the absence of definitive erythropoiesis.,	0	0	0	0	0	0	0	0	1	1
B0176	ETF1	EUKARYOTIC TRANSLATION TERMINATION FACTOR 1	Termination of protein biosynthesis and release of the nascent polypeptide chain are signaled by the presence of an in-frame stop codon at the aminoacyl site of the ribosome. The process of translation termination is universal and is mediated by protein release factors (RFs) and GTP. A class 1 RF recognizes the stop codon and promotes the hydrolysis of the ester bond linking the polypeptide chain…	0	0	0	0	0	0	0	0	0	0
B0177	DDX21	DEAD (ASP-GLU-ALA-ASP) BOX POLYPEPTIDE 21	DEAD box proteins, characterized by the conserved motif Asp-Glu-Ala-Asp (DEAD), are putative RNA helicases. They are implicated in a number of cellular processes involving alteration of RNA secondary structure such as translation initiation, nuclear and mitochondrial splicing, and ribosome and spliceosome assembly. Based on their distribution patterns, some members of this family are believed to …	0	0	0	0	0	0	0	0	0	0
B0178	IFNAR2	INTERFERON (ALPHA, BETA AND OMEGA) RECEPTOR 2	The protein encoded by this gene is a type I membrane protein that forms one of the two chains of a receptor for interferons alpha and beta. Binding and activation of the receptor stimulates Janus protein kinases, which in turn phosphorylate several proteins, including STAT1 and STAT2. Multiple transcript variants encoding at least two different isoforms have been found for this gene.,	0	0	0	0	0	0	0	0	1	0
B0179	IL18RAP	INTERLEUKIN 18 RECEPTOR ACCESSORY PROTEIN	The protein encoded by this gene is an accessory subunit of the heterodimeric receptor for IL18. This protein enhances the IL18 binding activity of IL18R1 (IL1RRP), a ligand binding subunit of IL18 receptor. The coexpression of IL18R1 and this protein is required for the activation of NF-kappaB and MAPK8 (JNK) in response to IL18.,	0	0	0	0	0	0	0	0	0	0
B0180	PBEF1	PRE-B-CELL COLONY ENHANCING FACTOR 1	0	0	0	0	0	1	1	0	0	0	0
B0181	SEMA4A	SEMA DOMAIN, IMMUNOGLOBULIN DOMAIN (IG), TRANSMEMBRANE DOMAIN (TM) AND SHORT CYTOPLASMIC DOMAIN, (SEMAPHORIN) 4A	SEMA4A is a member of the semaphorin family of soluble and transmembrane proteins. Semaphorins are involved in guidance of axonal migration during neuronal development and in immune responses.[supplied by OMIM],	0	0	0	0	0	0	0	0	0	1
B0182	VNN1	VANIN 1	This gene product is a member of the Vanin family of proteins which share extensive sequence similarity with each other, and also with biotinidase. The family includes secreted and membrane-associated proteins, a few of which have been reported to participate in hematopoietic cell trafficking. No biotinidase activity has been demonstrated for any of the vanin proteins, however, they possess pante…	0	0	0	0	0	0	0	0	0	0
C0001	CCL2	CHEMOKINE (C-C MOTIF) LIGAND 2	This gene is one of several cytokine genes clustered on the q-arm of chromosome 17. Cytokines are a family of secreted proteins involved in immunoregulatory and inflammatory processes. The protein encoded by this gene is structurally related to the CXC subfamily of cytokines. Members of this subfamily are characterized by two cysteines separated by a single amino acid. This cytokine displays chem…	1	1	0	0	0	1	1	0	0	0
C0002	CCL7	CHEMOKINE (C-C MOTIF) LIGAND 7	This gene encodes monocyte chemotactic protein 3, a secreted chemokine which attracts macrophages during inflammation and metastasis. It is a member of the C-C subfamily of chemokines which are characterized by having two adjacent cysteine residues. The protein is an in vivo substrate of matrix metalloproteinase 2, an enzyme which degrades components of the extracellular matrix. This gene is part…	1	1	0	0	0	0	0	0	0	0
C0003	CXCL5	CHEMOKINE (C-X-C MOTIF) LIGAND 5	The protein encoded by this gene is an inflammatory chemokine that belongs to the CXC chemokine family. This chemokine is produced concomitantly with interleukin-8 (IL8) in response to stimulation with either interleukin-1 (IL1) or tumor necrosis factor-alpha (TNFA). This chemokine is a potent chemotaxin involved in neutrophil activation.,	1	1	0	0	0	0	0	0	0	0
C0004	IL6	INTERLEUKIN 6 (INTERFERON, BETA 2)	0	1	0	0	0	1	1	1	1	0	0
C0005	LCN2	LIPOCALIN 2 (ONCOGENE 24P3)	0	0	0	0	0	0	0	0	0	0	0
C0006	TIMP1	TIMP METALLOPEPTIDASE INHIBITOR 1	This gene belongs to the TIMP gene family. The proteins encoded by this gene family are natural inhibitors of the matrix metalloproteinases (MMPs), a group of peptidases involved in degradation of the extracellular matrix. In addition to its inhibitory role against most of the known MMPs, the encoded protein is able to promote cell proliferation in a wide range of cell types, and may also have an…	0	0	0	0	0	0	0	0	0	1
C0007	IL1RN	INTERLEUKIN 1 RECEPTOR ANTAGONIST	The protein encoded by this gene is a member of the interleukin 1 cytokine family. This protein inhibits the activities of interleukin 1, alpha (IL1A) and interleukin 1, beta (IL1B), and modulates a variety of interleukin 1 related immune and inflammatory responses. This gene and five other closely related cytokine genes form a gene cluster spanning approximately 400 kb on chromosome 2. A polymor…	1	1	0	0	1	1	1	1	0	0
C0008	CXCL9	CHEMOKINE (C-X-C MOTIF) LIGAND 9	The function of this gene has not been specifically defined; however, it is thought to be involved in T cell trafficking. This gene has been localized to 4q21 with INP10, which is also a member of the chemokine family of cytokines.,	1	1	0	0	1	1	0	0	1	0
C0009	TGFBI	TRANSFORMING GROWTH FACTOR, BETA-INDUCED, 68KDA	0	0	0	0	0	0	0	0	0	0	0
C0010	FCER1G	FC FRAGMENT OF IGE, HIGH AFFINITY I, RECEPTOR FOR; GAMMA POLYPEPTIDE	The high affinity IgE receptor is a key molecule involved in allergic reactions. It is a tetramer composed of 1 alpha, 1 beta, and 2 gamma chains. The gamma chains are also subunits of other Fc receptors.,	1	1	0	0	1	0	0	0	0	0
C0011	FCGR3	FC RECEPTOR, IGG, LOW AFFINITY III	0	1	1	0	0	0	0	0	0	0	0
C0012	CXCL10	CHEMOKINE (C-X-C MOTIF) LIGAND 10	This gene encodes the interferon (gamma)-induced protein of 10kDa, a chemokine of the CXC subfamily that is one of the ligands for the receptor CXCR3. The binding of this protein to CXCR3 causes pleiotropic effects, including stimulation of monocytes, natural killer and T-cell migration, and modulation of adhesion molecule expression.,	1	1	0	0	1	1	1	0	1	0
C0013	CXCL1	CHEMOKINE (C-X-C MOTIF) LIGAND 1 (MELANOMA GROWTH STIMULATING ACTIVITY, ALPHA)	Chemokines are a group of small (approximately 8 to 14 kD), mostly basic, structurally related molecules that regulate cell trafficking of various types of leukocytes through interactions with a subset of 7-transmembrane, G protein-coupled receptors. Chemokines also play fundamental roles in the development, homeostasis, and function of the immune system, and they have effects on cells of the cen…	1	1	1	0	1	1	1	0	0	0
C0014	CXCL2	CHEMOKINE (C-X-C MOTIF) LIGAND 2	0	1	1	0	0	1	1	1	0	0	0
C0015	S100A8	S100 CALCIUM BINDING PROTEIN A8 (CALGRANULIN A)	The protein encoded by this gene is a member of the S100 family of proteins containing 2 EF-hand calcium-binding motifs. S100 proteins are localized in the cytoplasm and/or nucleus of a wide range of cells, and involved in the regulation of a number of cellular processes such as cell cycle progression and differentiation. S100 genes include at least 13 members which are located as a cluster on ch…	0	0	0	0	0	0	0	0	0	1
C0016	S100A9	S100 CALCIUM BINDING PROTEIN A9 (CALGRANULIN B)	The protein encoded by this gene is a member of the S100 family of proteins containing 2 EF-hand calcium-binding motifs. S100 proteins are localized in the cytoplasm and/or nucleus of a wide range of cells, and involved in the regulation of a number of cellular processes such as cell cycle progression and differentiation. S100 genes include at least 13 members which are located as a cluster on ch…	0	0	0	0	0	1	0	0	0	1
C0017	CCL4	CHEMOKINE (C-C MOTIF) LIGAND 4	This gene is one of several cytokine genes clustered on the q-arm of chromosome 17. Cytokines are a family of secreted proteins involved in immunoregulatory and inflammatory processes. This protein is similar to CCL4 which inhibits HIV entry by binding to the cellular receptor CCR5. The copy number of this gene varies among individuals; most individuals have 1-5 copies in the diploid genome, alth…	1	1	0	0	1	1	1	1	0	0
C0018	GBP2	GUANYLATE BINDING PROTEIN 2, INTERFERON-INDUCIBLE	Interferons are cytokines that have antiviral effects and inhibit tumor cell proliferation. They induce a large number of genes in their target cells, including those coding for the guanylate-binding proteins (GBPs). GBPs are characterized by their ability to specifically bind guanine nucleotides (GMP, GDP, and GTP). The protein encoded by this gene is a GTPase that converts GTP to GDP and GMP.,	1	0	0	0	1	1	0	0	1	0
C0019	CD14	CD14 ANTIGEN	CD14 is a surface protein preferentially expressed on monocytes/macrophages. It binds lipopolysaccharide binding protein and recently has been shown to bind apoptotic cells.,	1	1	0	0	0	0	0	0	0	0
C0020	IL1B	INTERLEUKIN 1, BETA	The protein encoded by this gene is a member of the interleukin 1 cytokine family. This cytokine is produced by activated macrophages as a proprotein, which is proteolytically processed to its active form by caspase 1 (CASP1/ICE). This cytokine is an important mediator of the inflammatory response, and is involved in a variety of cellular activities, including cell proliferation, differentiation,…	1	1	1	0	1	1	0	1	0	0
C0021	SAA2	SERUM AMYLOID A2	0	1	0	0	0	0	0	0	0	0	0
C0022	IFIT1	INTERFERON-INDUCED PROTEIN WITH TETRATRICOPEPTIDE REPEATS 1	0	1	0	0	0	1	1	0	0	1	0
C0023	TGTP	T-CELL SPECIFIC GTPASE	0	1	0	0	0	0	0	0	0	0	0
D0001	TK1	THYMIDINE KINASE 1, SOLUBLE	0	0	0	0	0	0	0	0	0	0	0
D0002	AURKB	AURORA KINASE B	Chromosomal segregation during mitosis as well as meiosis is regulated by kinases and phosphatases. The Aurora kinases associate with microtubules during chromosome movement and segregation. Aurora kinase B localizes to microtubules near kinetochores, specifically to the specialized microtubules called K-fibers, and Aurora kinase A (MIM 603072) localizes to centrosomes (Lampson et al., 2004).[sup…	0	0	1	0	0	0	0	0	0	1
D0003	BUB1B	BUB1 BUDDING UNINHIBITED BY BENZIMIDAZOLES 1 HOMOLOG BETA (YEAST)	This gene encodes a kinase involved in spindle checkpoint function. The protein has been localized to the kinetochore and plays a role in the inhibition of the anaphase-promoting complex/cyclosome (APC/C), delaying the onset of anaphase and ensuring proper chromosome segregation. Impaired spindle checkpoint function has been found in many forms of cancer.,	0	0	1	1	0	0	0	0	0	0
D0004	SPP1	SECRETED PHOSPHOPROTEIN 1 (OSTEOPONTIN, BONE SIALOPROTEIN I, EARLY T-LYMPHOCYTE ACTIVATION 1)	0	1	1	0	0	0	0	0	0	0	1
D0005	KIF20A	KINESIN FAMILY MEMBER 20A	0	0	0	0	0	0	0	0	0	0	0
D0006	CCNB1	CYCLIN B1	The protein encoded by this gene is a regulatory protein involved in mitosis. The gene product complexes with p34(cdc2) to form the maturation-promoting factor (MPF). Two alternative transcripts have been found, a constitutively expressed transcript and a cell cycle-regulated transcript, that is expressed predominantly during G2/M phase. The different transcripts result from the use of alternate …	0	0	1	1	0	0	0	0	0	0
D0007	MKI67	ANTIGEN IDENTIFIED BY MONOCLONAL ANTIBODY KI-67	0	0	0	1	0	0	0	0	0	0	0
D0008	ASF1B	ASF1 ANTI-SILENCING FUNCTION 1 HOMOLOG B (S. CEREVISIAE)	This gene encodes a member of the H3/H4 family of histone chaperone proteins and is similar to the anti-silencing function-1 gene in yeast. The encoded protein is the substrate of the tousled-like kinase family of cell cycle-regulated kinases, and may play a key role in modulating the nucleosome structure of chromatin by ensuring a constant supply of histones at sites of nucleosome assembly.,	0	0	0	0	0	0	0	0	0	0
D0009	RRM2	RIBONUCLEOTIDE REDUCTASE M2 POLYPEPTIDE	Ribonucleotide reductase catalyzes the formation of deoxyribonucleotides from ribonucleotides. It is composed of 2 non-identical subunits, proteins M1 and M2. Synthesis of M2 is regulated in a cell-cycle dependent fashion.,	0	0	0	0	0	0	0	0	0	0
D0010	CDC20	CDC20 CELL DIVISION CYCLE 20 HOMOLOG (S. CEREVISIAE)	CDC20 appears to act as a regulatory protein interacting with several other proteins at multiple points in the cell cycle. It is required for two microtubule-dependent processes, nuclear movement prior to anaphase and chromosome separation.,	0	0	1	1	0	0	0	0	0	0
D0011	ECT2	EPITHELIAL CELL TRANSFORMING SEQUENCE 2 ONCOGENE	The protein encoded by this gene is a transforming protein that is related to Rho-specific exchange factors and yeast cell cycle regulators. The expression of this gene is elevated with the onset of DNA synthesis and remains elevated during G2 and M phases. In situ hybridization analysis showed that expression is at a high level in cells undergoing mitosis in regenerating liver. Thus, this protei…	0	0	1	0	0	0	0	0	0	0
D0012	PRC1	PROTEIN REGULATOR OF CYTOKINESIS 1	This gene encodes a protein that is involved in cytokinesis. The encoded protein is at high level during S and G2/M and drop dramatically after cell exit mitosis and enter G1. It is located in the nucleus during interphase, and becomes associated with mitotic spindles in a highly dynamic manner during mitosis, and localizes to the cell mid-body during cytokinesis. This protein has been shown to b…	0	0	0	0	0	0	0	0	0	0
D0013	RETNLB	RESISTIN LIKE BETA	0	0	0	0	0	0	0	0	0	0	0
D0014	EDAR	ECTODYSPLASIN A RECEPTOR	0	0	0	0	0	0	0	0	0	0	1
D0015	UHRF1	UBIQUITIN-LIKE, CONTAINING PHD AND RING FINGER DOMAINS, 1	UHRF1 binds to an inverted CCAAT box in the promoter of topoisomerase II-alpha (TOP2A; MIM 126430). TOP2A introduces transient double-stranded breaks in DNA, which are required during the cell cycle for DNA replication, chromosome condensation, and segregation. UHRF1 is likely involved in TOPO2A expression (Hopfner et al., 2000).[supplied by OMIM],	0	0	1	0	0	0	0	0	0	1
D0016	PSAT1	PHOSPHOSERINE AMINOTRANSFERASE 1	The protein encoded by this gene is likely a phosphoserine aminotransferase, based on similarity to proteins in mouse, rabbit, and Drosophila. Alternative splicing of this gene results in two transcript variants encoding different isoforms.,	0	0	0	0	0	0	0	0	0	0
D0017	CDC6	CDC6 CELL DIVISION CYCLE 6 HOMOLOG (S. CEREVISIAE)	The protein encoded by this gene is highly similar to Saccharomyces cerevisiae Cdc6, a protein essential for the initiation of DNA replication. This protein functions as a regulator at the early steps of DNA replication. It localizes in cell nucleus during cell cyle G1, but translocates to the cytoplasm at the start of S phase. The subcellular translocation of this protein during cell cyle is reg…	0	0	1	1	0	0	0	0	0	0
D0018	TOP2A	TOPOISOMERASE (DNA) II ALPHA 170KDA	This gene encodes a DNA topoisomerase, an enzyme that controls and alters the topologic states of DNA during transcription. This nuclear enzyme is involved in processes such as chromosome condensation, chromatid separation, and the relief of torsional stress that occurs during DNA transcription and replication. It catalyzes the transient breaking and rejoining of two strands of duplex DNA which a…	0	0	0	0	0	0	0	0	0	1
D0019	CCNA2	CYCLIN A2	The protein encoded by this gene belongs to the highly conserved cyclin family, whose members are characterized by a dramatic periodicity in protein abundance through the cell cycle. Cyclins function as regulators of CDK kinases. Different cyclins exhibit distinct expression and degradation patterns which contribute to the temporal coordination of each mitotic event. In contrast to cyclin A1, whi…	0	0	1	1	0	0	0	0	0	0
D0020	RFC4	REPLICATION FACTOR C (ACTIVATOR 1) 4, 37KDA	The elongation of primed DNA templates by DNA polymerase delta and DNA polymerase epsilon requires the accessory proteins proliferating cell nuclear antigen (PCNA) and replication factor C (RFC). RFC, also named activator 1, is a protein complex consisting of five distinct subunits of 140, 40, 38, 37, and 36 kD. This gene encodes the 37 kD subunit. This subunit forms a core complex with the 36 an…	0	0	0	0	0	0	0	0	0	0
D0021	CCNF	CYCLIN F	This gene encodes a member of the cyclin family. Cyclins are important regulators of cell cycle transitions through their ability to bind and activate cyclin-dependent protein kinases. This member also belongs to the F-box protein family which is characterized by an approximately 40 amino acid motif, the F-box. The F-box proteins constitute one of the four subunits of the ubiquitin protein ligase…	0	0	1	1	0	0	0	0	0	1
D0022	NPAS2	NEURONAL PAS DOMAIN PROTEIN 2	The protein encoded by this gene is a member of the basic helix-loop-helix (bHLH)-PAS family of transcription factors. A similar mouse protein may play a regulatory role in the acquisition of specific types of memory. It also may function as a part of a molecular clock operative in the mammalian forebrain.,	0	0	0	0	0	0	0	0	0	0
D0023	BIRC5	BACULOVIRAL IAP REPEAT-CONTAINING 5 (SURVIVIN)	This gene is a member of the inhibitor of apoptosis (IAP) gene family, which encode negative regulatory proteins that prevent apoptotic cell death. IAP family members usually contain multiple baculovirus IAP repeat (BIR) domains, but this gene encodes proteins with only a single BIR domain. The encoded proteins also lack a C-terminus RING finger domain. Gene expression is high during fetal develo…	0	0	0	0	0	0	0	0	0	1
D0024	UBE2C	UBIQUITIN-CONJUGATING ENZYME E2C	The modification of proteins with ubiquitin is an important cellular mechanism for targeting abnormal or short-lived proteins for degradation. Ubiquitination involves at least three classes of enzymes: ubiquitin-activating enzymes, or E1s, ubiquitin-conjugating enzymes, or E2s, and ubiquitin-protein ligases, or E3s. This gene encodes a member of the E2 ubiquitin-conjugating enzyme family. This en…	0	0	1	1	0	0	0	0	0	0
D0025	HMOX1	HEME OXYGENASE (DECYCLING) 1	Heme oxygenase, an essential enzyme in heme catabolism, cleaves heme to form biliverdin, which is subsequently converted to bilirubin by biliverdin reductase, and carbon monoxide, a putative neurotransmitter. Heme oxygenase activity is induced by its substrate heme and by various nonheme substances. Heme oxygenase occurs as 2 isozymes, an inducible heme oxygenase-1 and a constitutive heme oxygena…	0	0	0	0	0	0	0	0	0	0
D0026	MELK	MATERNAL EMBRYONIC LEUCINE ZIPPER KINASE	0	0	0	0	0	0	0	0	0	0	0
D0027	MARCO	MACROPHAGE RECEPTOR WITH COLLAGENOUS STRUCTURE	The protein encoded by this gene is a member of the class A scavenger receptor family and is part of the innate antimicrobial immune system. The protein may bind both Gram-negative and Gram-positive bacteria via an extracellular, C-terminal, scavenger receptor cysteine-rich (SRCR) domain. In addition to short cytoplasmic and transmembrane domains, there is an extracellular spacer domain and a lon…	0	0	0	0	0	0	0	0	0	0
D0028	CDC2A	CELL DIVISION CYCLE 2 HOMOLOG A (S. POMBE)	0	0	0	1	1	0	0	0	0	0	0
D0029	CTSK	CATHEPSIN K (PYCNODYSOSTOSIS)	The protein encoded by this gene is a lysosomal cysteine proteinase involved in bone remodeling and resorption. This protein, which is a member of the peptidase C1 protein family, is predominantly expressed in osteoclasts. However, the encoded protein is also expressed in a significant fraction of human breast cancers, where it could contribute to tumor invasiveness. Mutations in this gene are th…	0	0	0	0	1	0	0	0	0	0
E0001	CLCA3	CHLORIDE CHANNEL, CALCIUM ACTIVATED, FAMILY MEMBER 3	The protein encoded by this gene belongs to the calcium sensitive chloride conductance protein family. To date, all members of this gene family map to the same site on chromosome 1p31-p22 and share high degrees of homology in size, sequence and predicted structure, but differ significantly in their tissue distributions. However, this gene product is a truncated, structurally divergent member of t…	0	0	0	0	0	0	0	0	0	0
E0002	CCL8	CHEMOKINE (C-C MOTIF) LIGAND 8	This gene is one of several cytokine genes clustered on the q-arm of chromosome 17. Cytokines are a family of secreted proteins involved in immunoregulatory and inflammatory processes. The protein encoded by this gene is structurally related to the CXC subfamily of cytokines. Members of this subfamily are characterized by two cysteines separated by a single amino acid. This cytokine displays chem…	1	1	0	0	1	1	0	0	0	0
E0003	MMP12	MATRIX METALLOPEPTIDASE 12 (MACROPHAGE ELASTASE)	Proteins of the matrix metalloproteinase (MMP) family are involved in the breakdown of extracellular matrix in normal physiological processes, such as embryonic development, reproduction, and tissue remodeling, as well as in disease processes, such as arthritis and metastasis. Most MMP's are secreted as inactive proproteins which are activated when cleaved by extracellular proteinases. It is thou…	0	0	0	0	1	1	0	0	0	0
E0004	ARG1	ARGINASE, LIVER	Arginase catalyzes the hydrolysis of arginine to ornithine and urea. At least two isoforms of mammalian arginase exist (types I and II) which differ in their tissue distribution, subcellular localization, immunologic crossreactivity and physiologic function. The type I isoform encoded by this gene, is a cytosolic enzyme and expressed predominantly in the liver as a component of the urea cycle. In…	0	0	0	0	0	0	0	0	0	0
E0005	SPRR2A	SMALL PROLINE-RICH PROTEIN 2A	0	0	0	0	0	0	0	0	0	0	1
E0006	NCF2	NEUTROPHIL CYTOSOLIC FACTOR 2 (65KDA, CHRONIC GRANULOMATOUS DISEASE, AUTOSOMAL 2)	This gene encodes neutrophil cytosolic factor 2, the 67-kilodalton cytosolic subunit of the multi-protein complex known as NADPH oxidase found in neutrophils. This oxidase produces a burst of superoxide which is delivered to the lumen of the neutrophil phagosome. Mutations in this gene, as well as in other NADPH oxidase subunits, can result in chronic granulomatous disease.,	0	0	0	0	1	0	0	0	0	0
E0007	EVI2A	ECOTROPIC VIRAL INTEGRATION SITE 2A	0	0	0	0	0	0	0	0	0	0	0
E0008	CSF2RA	COLONY STIMULATING FACTOR 2 RECEPTOR, ALPHA, LOW-AFFINITY (GRANULOCYTE-MACROPHAGE)	The protein encoded by this gene is the alpha subunit of the heterodimeric receptor for colony stimulating factor 2, a cytokine which controls the production, differentiation, and function of granulocytes and macrophages. The encoded protein is a member of the cytokine family of receptors. This gene is found in the pseudoautosomal region (PAR) of the X and Y chromosomes. Six transcript variants e…	0	0	0	0	0	1	0	0	0	0
E0009	DOCK2	DEDICATOR OF CYTOKINESIS 2	The DOCK2 gene encodes a hematopoietic cell-specific CDM family protein that is indispensable for lymphocyte chemotaxis.[supplied by OMIM],	1	1	0	0	0	0	0	0	0	1
E0010	IGSF6	IMMUNOGLOBULIN SUPERFAMILY, MEMBER 6	0	0	0	0	0	0	0	0	0	0	0
E0011	BTG1	B-CELL TRANSLOCATION GENE 1, ANTI-PROLIFERATIVE	The BTG1 gene locus has been shown to be involved in a t(8;12)(q24;q22) chromosomal translocation in a case of B-cell chronic lymphocytic leukemia. It is a member of a family of antiproliferative genes. BTG1 expression is maximal in the G0/G1 phases of the cell cycle and downregulated when cells progressed through G1. It negatively regulates cell proliferation.,	0	0	0	0	1	1	1	0	0	1
E0012	SYK	SPLEEN TYROSINE KINASE	0	1	0	0	0	0	1	0	0	0	1
E0013	FABP5	FATTY ACID BINDING PROTEIN 5 (PSORIASIS-ASSOCIATED)	This gene encodes the fatty acid binding protein found in epidermal cells, and was first identified as being upregulated in psoriasis tissue. Fatty acid binding proteins are a family of small, highly conserved, cytoplasmic proteins that bind long-chain fatty acids and other hydrophobic ligands. It is thought that FABPs roles include fatty acid uptake, transport, and metabolism.,	0	0	0	0	0	0	0	0	0	0
E0014	LCP1	LYMPHOCYTE CYTOSOLIC PROTEIN 1 (L-PLASTIN)	Plastins are a family of actin-binding proteins that are conserved throughout eukaryote evolution and expressed in most tissues of higher eukaryotes. In humans, two ubiquitous plastin isoforms (L and T) have been identified. Plastin 1 (otherwise known as Fimbrin) is a third distinct plastin isoform which is specifically expressed at high levels in the small intestine. The L isoform is expressed o…	0	0	0	0	0	0	0	0	0	0
E0015	ARHGDIB	RHO GDP DISSOCIATION INHIBITOR (GDI) BETA	0	0	0	0	0	0	0	0	0	0	0
E0016	NFKBIE	NUCLEAR FACTOR OF KAPPA LIGHT POLYPEPTIDE GENE ENHANCER IN B-CELLS INHIBITOR, EPSILON	NFKB1 (MIM 164011) or NFKB2 (MIM 164012) is bound to REL (MIM 164910), RELA (MIM 164014), or RELB (MIM 604758) to form the NFKB complex. The NFKB complex is inhibited by I-kappa-B proteins (NFKBIA, MIM 164008 or NFKBIB, MIM 604495), which inactivate NF-kappa-B by trapping it in the cytoplasm. Phosphorylation of serine residues on the I-kappa-B proteins by kinases (IKBKA, MIM 600664, or IKBKB, MIM…	0	0	0	0	1	0	1	0	0	0
E0017	NCF4	NEUTROPHIL CYTOSOLIC FACTOR 4, 40KDA	The protein encoded by this gene is a cytosolic regulatory component of the superoxide-producing phagocyte NADPH-oxidase, a multicomponent enzyme system important for host defense. This protein is preferentially expressed in cells of myeloid lineage. It interacts primarily with neutrophil cytosolic factor 2 (NCF2/p67-phox) to form a complex with neutrophil cytosolic factor 1 (NCF1/p47-phox), whic…	0	0	0	0	1	0	0	0	0	0
E0018	RAC2	RAS-RELATED C3 BOTULINUM TOXIN SUBSTRATE 2 (RHO FAMILY, SMALL GTP BINDING PROTEIN RAC2)	The protein encoded by this gene is a GTPase which belongs to the RAS superfamily of small GTP-binding proteins. Members of this superfamily appear to regulate a diverse array of cellular events, including the control of cell growth, cytoskeletal reorganization, and the activation of protein kinases.,	0	0	0	0	0	0	0	0	0	1
E0019	FGR	GARDNER-RASHEED FELINE SARCOMA VIRAL (V-FGR) ONCOGENE HOMOLOG	0	0	0	1	0	1	0	0	0	0	0
E0020	CD44	CD44 ANTIGEN (INDIAN BLOOD GROUP)	The protein encoded by this gene is a cell-surface glycoprotein involved in cell-cell interactions, cell adhesion and migration. It is a receptor for hyaluronic acid (HA) and can also interact with other ligands, such as osteopontin, collagens, and matrix metalloproteinases (MMPs). This protein participates in a wide variety of cellular functions including lymphocyte activation, recirculation and…	0	0	0	0	1	0	1	1	0	1
E0021	HCK	HEMOPOIETIC CELL KINASE	The protein encoded by this gene is a protein-tyrosine kinase that is predominantly expressed in hemopoietic cell types. The encoded protein may help couple the Fc receptor to the activation of the respiratory burst. In addition, it may play a role in neutrophil migration and in the degranulation of neutrophils. Alternate translation initiation site usage, including a non-AUG (CUG) codon, results…	0	0	0	0	1	0	1	0	0	0
E0022	ITGAX	INTEGRIN, ALPHA X (COMPLEMENT COMPONENT 3 RECEPTOR 4 SUBUNIT)	This gene encodes the integrin alpha X chain protein. Integrins are heterodimeric integral membrane proteins composed of an alpha chain and a beta chain. This protein combines with the beta 2 chain (ITGB2) to form a leukocyte-specific integrin referred to as inactivated-C3b (iC3b) receptor 4 (CR4). The alpha X beta 2 complex seems to overlap the properties of the alpha M beta 2 integrin in the ad…	1	0	0	0	1	0	0	0	0	0
E0023	DOK2	DOCKING PROTEIN 2, 56KDA	The protein encoded by this gene is constitutively tyrosine phosphorylated in hematopoietic progenitors isolated from chronic myelogenous leukemia (CML) patients in the chronic phase. It may be a critical substrate for p210(bcr/abl), a chimeric protein whose presence is associated with CML. This encoded protein binds p120 (RasGAP) from CML cells.,	0	0	0	0	0	0	0	0	0	0
E0024	LGMN	LEGUMAIN	This gene encodes a cysteine protease that has a strict specificity for hydrolysis of asparaginyl bonds. This enzyme may be involved in the processing of bacterial peptides and endogenous proteins for MHC class II presentation in the lysosomal/endosomal systems. Enzyme activation is triggered by acidic pH and appears to be autocatalytic. Protein expression occurs after monocytes differentiate int…	0	0	0	0	0	0	0	0	0	0
E0025	ACP5	ACID PHOSPHATASE 5, TARTRATE RESISTANT	Acid phosphatase 5 is an iron containing glycoprotein which catalyzes the conversion of orthophosphoric monoester to alcohol and orthophosphate. ACP5 is the most basic of the acid phosphatases and is the only form not inhibited by L(+)-tartrate.,	0	0	0	0	0	0	0	0	0	0
E0026	CTSZ	CATHEPSIN Z	The protein encoded by this gene is a lysosomal cysteine proteinase and member of the peptidase C1 family. It exhibits both carboxy-monopeptidase and carboxy-dipeptidase activities. The encoded protein has also been known as cathepsin X and cathepsin P. This gene is expressed ubiquitously in cancer cell lines and primary tumors and, like other members of this family, may be involved in tumorigene…	0	0	0	0	0	0	0	0	0	0
E0027	CD83	CD83 ANTIGEN (ACTIVATED B LYMPHOCYTES, IMMUNOGLOBULIN SUPERFAMILY)	0	0	0	0	0	1	1	1	1	0	0
E0028	CD48	CD48 ANTIGEN (B-CELL MEMBRANE PROTEIN)	0	0	0	0	0	1	0	0	0	0	0
E0029	ALOX5AP	ARACHIDONATE 5-LIPOXYGENASE-ACTIVATING PROTEIN	This gene encodes a protein which, with 5-lipoxygenase, is required for leukotriene synthesis. Leukotrienes are arachidonic acid metabolites which have been implicated in various types of inflammatory responses, including asthma, arthritis and psoriasis. This protein localizes to the plasma membrane. Inhibitors of its function impede translocation of 5-lipoxygenase from the cytoplasm to the cell …	0	0	0	0	0	0	0	0	0	0
E0030	CST7	CYSTATIN F (LEUKOCYSTATIN)	The cystatin superfamily encompasses proteins that contain multiple cystatin-like sequences. Some of the members are active cysteine protease inhibitors, while others have lost or perhaps never acquired this inhibitory activity. There are three inhibitory families in the superfamily, including the type 1 cystatins (stefins), type 2 cystatins and the kininogens. The type 2 cystatin proteins are a …	0	0	0	0	0	0	0	0	0	0
E0031	SLA	SRC-LIKE-ADAPTOR	0	0	0	0	0	0	0	0	0	0	0
E0032	H2-EB1	HISTOCOMPATIBILITY 2, CLASS II ANTIGEN E BETA	0	1	0	0	0	0	0	0	0	0	0
E0033	IFI30	INTERFERON, GAMMA-INDUCIBLE PROTEIN 30	The protein encoded by this gene is a lysosomal thiol reductase that at low pH can reduce protein disulfide bonds. The enzyme is expressed constitutively in antigen-presenting cells and induced by gamma-interferon in other cell types. This enzyme has an important role in MHC class II-restricted antigen processing.,	1	0	0	0	0	0	0	0	1	0
E0034	S100A4	S100 CALCIUM BINDING PROTEIN A4 (CALCIUM PROTEIN, CALVASCULIN, METASTASIN, MURINE PLACENTAL HOMOLOG)	The protein encoded by this gene is a member of the S100 family of proteins containing 2 EF-hand calcium-binding motifs. S100 proteins are localized in the cytoplasm and/or nucleus of a wide range of cells, and involved in the regulation of a number of cellular processes such as cell cycle progression and differentiation. S100 genes include at least 13 members which are located as a cluster on ch…	0	0	0	0	0	0	0	0	0	0
E0035	CD52	CD52 ANTIGEN (CAMPATH-1 ANTIGEN)	0	0	0	0	0	0	0	0	0	0	0
E0036	LY86	LYMPHOCYTE ANTIGEN 86	0	1	1	0	0	0	0	0	0	0	0
E0037	PLA2G7	PHOSPHOLIPASE A2, GROUP VII (PLATELET-ACTIVATING FACTOR ACETYLHYDROLASE, PLASMA)	The PLA2G7 gene encodes platelet-activating factor (PAF) acetylhydrolase (EC 3.1.1.47), a secreted enzyme that catalyzes the degradation of PAF to inactive products by hydrolysis of the acetyl group at the sn-2 position, producing the biologically inactive products LYSO-PAF and acetate.[supplied by OMIM],	1	1	0	0	0	0	0	0	0	0
E0038	CD68	CD68 ANTIGEN	CD68 is a 110-kD transmembrane glycoprotein that is highly expressed by human monocytes and tissue macrophages. It is a type I integral membrane protein with a heavily glycosylated extracellular domain.,	0	0	0	0	0	0	0	0	0	0
E0039	LGALS3	LECTIN, GALACTOSIDE-BINDING, SOLUBLE, 3 (GALECTIN 3)	0	0	0	0	0	0	0	0	0	0	0
E0040	C3	COMPLEMENT COMPONENT 3	Complement component C3 plays a central role in the activation of complement system. Its activation is required for both classical and alternative complement activation pathways. People with C3 deficiency are susceptable to bacteria infection.,	1	1	0	0	0	0	0	0	0	0
E0041	ITGB2	INTEGRIN, BETA 2 (COMPLEMENT COMPONENT 3 RECEPTOR 3 AND 4 SUBUNIT)	The ITGB2 protein product is the integrin beta chain beta 2. Integrins are integral cell-surface proteins composed of an alpha chain and a beta chain. A given chain may combine with multiple partners resulting in different integrins. For example, beta 2 combines with the alpha L chain to form the integrin LFA-1, and combines with the alpha M chain to form the integrin Mac-1. Integrins are known t…	1	1	0	0	0	0	0	0	0	1
E0042	TYROBP	TYRO PROTEIN TYROSINE KINASE BINDING PROTEIN	This gene encodes a transmembrane signaling polypeptide which contains an immunoreceptor tyrosine-based activation motif (ITAM) in its cytoplasmic domain. The encoded protein may associate with the killer-cell inhibitory receptor (KIR) family of membrane glycoproteins and may act as an activating signal transduction element. This protein may bind zeta-chain (TCR) associated protein kinase 70kDa (…	0	0	0	0	0	0	0	0	0	0
E0043	ADAM8	ADAM METALLOPEPTIDASE DOMAIN 8	This gene encodes a member of the ADAM (a disintegrin and metalloprotease domain) family. Members of this family are membrane-anchored proteins structurally related to snake venom disintegrins, and have been implicated in a variety of biological processes involving cell-cell and cell-matrix interactions, including fertilization, muscle development, and neurogenesis. The protein encoded by this ge…	0	0	0	0	0	0	0	0	0	0
E0044	CD33	CD33 ANTIGEN (GP67)	0	0	0	0	0	0	1	0	0	0	0
E0045	SLC16A3	SOLUTE CARRIER FAMILY 16 (MONOCARBOXYLIC ACID TRANSPORTERS), MEMBER 3	0	0	0	0	0	0	0	0	0	0	0
E0046	BATF	BASIC LEUCINE ZIPPER TRANSCRIPTION FACTOR, ATF-LIKE	The protein encoded by this gene is a nuclear basic leucine zipper protein that belongs to the AP-1/ATF superfamily of transcription factors. The leucine zipper of this protein mediates dimerization with members of the Jun family of proteins. This protein is thought to be a negative regulator of AP-1/ATF transcriptional events.,	0	0	0	0	1	0	0	0	0	0
E0047	CCR1	CHEMOKINE (C-C MOTIF) RECEPTOR 1	This gene encodes a member of the beta chemokine receptor family, which is predicted to be a seven transmembrane protein similar to G protein-coupled receptors. The ligands of this receptor include macrophage inflammatory protein 1 alpha (MIP-1 alpha), regulated on activation normal T expressed and secreted protein (RANTES), monocyte chemoattractant protein 3 (MCP-3), and myeloid progenitor inhib…	1	1	0	0	0	0	0	0	0	1
E0048	IRF4	INTERFERON REGULATORY FACTOR 4	0	1	0	0	0	1	1	0	1	0	1
E0049	LY96	LYMPHOCYTE ANTIGEN 96	The MD-2 protein appears to associate with toll-like receptor 4 on the cell surface and confers responsiveness to lipopolysaccyaride (LPS), thus providing a link between the receptor and LPS signaling.,	1	1	0	0	0	0	0	0	0	0
E0050	PTGER4	PROSTAGLANDIN E RECEPTOR 4 (SUBTYPE EP4)	The protein encoded by this gene is a member of the G-protein coupled receptor family. This protein is one of four receptors identified for prostaglandin E2 (PGE2). This receptor can activate T-cell factor signaling. It has been shown to mediate PGE2 induced expression of early growth response 1 (EGR1), regulate the level and stability of cyclooxygenase-2 mRNA, and lead to the phosphorylation of …	0	0	0	0	1	1	0	1	0	1
E0051	HSPA8	HEAT SHOCK 70KDA PROTEIN 8	The product encoded by this gene belongs to the heat shock protein 70 family which contains both heat-inducible and constitutively expressed members. The latter are called heat-shock cognate proteins. This gene encodes a heat-shock cognate protein. This protein binds to nascent polypeptides to facilitate correct folding. It also functions as an ATPase in the disassembly of clathrin-coated vesicle…	0	0	1	0	0	0	0	0	0	0
E0052	MAFB	V-MAF MUSCULOAPONEUROTIC FIBROSARCOMA ONCOGENE HOMOLOG B (AVIAN)	The protein encoded by this gene is a basic leucine zipper (bZIP) transcription factor that plays an important role in the regulation of lineage-specific hematopoiesis. The encoded nuclear protein represses ETS1-mediated transcription of erythroid-specific genes in myeloid cells. This gene contains no introns.,	0	0	0	0	0	0	0	0	0	1
E0053	SELP	SELECTIN P (GRANULE MEMBRANE PROTEIN 140KDA, ANTIGEN CD62)	SELP is a platelet alpha-granule membrane protein of molecular weight 140,000 that redistributes to the plasma membrane during platelet activation and degranulation. It is a member of a family of adhesion/homing receptors. Alternative splice variants may occur but are not well documented,	1	1	0	0	0	0	0	0	0	0
E0054	MYC	V-MYC MYELOCYTOMATOSIS VIRAL ONCOGENE HOMOLOG (AVIAN)	The protein encoded by this gene is a multifunctional, nuclear phosphoprotein that plays a role in cell cycle progression, apoptosis and cellular transformation. It functions as a transcription factor that regulates transcription of specific target genes. Mutations, overexpression, rearrangement and translocation of this gene have been associated with a variety of hematopoietic tumors, leukemias …	0	0	1	0	0	0	0	1	0	0
E0055	TFPI2	TISSUE FACTOR PATHWAY INHIBITOR 2	0	0	0	0	0	1	0	0	0	0	0
E0056	CCL22	CHEMOKINE (C-C MOTIF) LIGAND 22	This gene is one of several Cys-Cys (CC) cytokine genes clustered on the q arm of chromosome 16. Cytokines are a family of secreted proteins involved in immunoregulatory and inflammatory processes. The CC cytokines are proteins characterized by two adjacent cysteines. The cytokine encoded by this gene displays chemotactic activity for monocytes, dendritic cells, natural killer cells and for chron…	1	1	0	0	1	1	0	0	0	0
E0057	CDKN1A	CYCLIN-DEPENDENT KINASE INHIBITOR 1A (P21, CIP1)	This gene encodes a potent cyclin-dependent kinase inhibitor. The encoded protein binds to and inhibits the activity of cyclin-CDK2 or -CDK4 complexes, and thus functions as a regulator of cell cycle progression at G1. The expression of this gene is tightly controlled by the tumor suppressor protein p53, through which this protein mediates the p53-dependent cell cycle G1 phase arrest in response …	1	0	1	0	0	0	0	1	0	0
E0058	NFIL3	NUCLEAR FACTOR, INTERLEUKIN 3 REGULATED	0	0	0	0	0	1	0	0	0	0	0
E0059	AREG	AMPHIREGULIN (SCHWANNOMA-DERIVED GROWTH FACTOR)	The protein encoded by this gene is a member of the epidermal growth factor family. It is an autocrine growth factor as well as a mitogen for astrocytes, Schwann cells, and fibroblasts. It is related to epidermal growth factor (EGF) and transforming growth factor alpha (TGF-alpha). This protein interacts with the EGF/TGF-alpha receptor to promote the growth of normal epithelial cells and inhibits…	0	0	0	0	0	0	0	0	0	0
E0060	CCL17	CHEMOKINE (C-C MOTIF) LIGAND 17	This gene is one of several Cys-Cys (CC) cytokine genes clustered on the q arm of chromosome 16. Cytokines are a family of secreted proteins involved in immunoregulatory and inflammatory processes. The CC cytokines are proteins characterized by two adjacent cysteines. The cytokine encoded by this gene displays chemotactic activity for T lymphocytes, but not monocytes or granulocytes. The product …	1	0	0	0	1	1	0	0	0	0
E0061	TFF2	TREFOIL FACTOR 2 (SPASMOLYTIC PROTEIN 1)	Members of the trefoil family are characterized by having at least one copy of the trefoil motif, a 40-amino acid domain that contains three conserved disulfides. They are stable secretory proteins expressed in gastrointestinal mucosa. Their functions are not defined, but they may protect the mucosa from insults, stabilize the mucus layer and affect healing of the epithelium. The encoded protein …	0	0	0	0	0	0	0	0	0	0
E0062	CXCL13	CHEMOKINE (C-X-C MOTIF) LIGAND 13 (B-CELL CHEMOATTRACTANT)	B lymphocyte chemoattractant, independently cloned and named Angie, is a CXC chemokine strongly expressed in the follicles of the spleen, lymph nodes, and Peyer's patches. It preferentially promotes the migration of B lymphocytes (compared to T cells and macrophages), apparently by stimulating calcium influx into, and chemotaxis of, cells expressing Burkitt's lymphoma receptor 1 (BLR-1). It may t…	1	1	0	0	0	0	0	0	0	1
E0063	REG3G	REGENERATING ISLET-DERIVED 3 GAMMA	0	1	1	0	0	0	0	0	0	0	0
E0064	F10	COAGULATION FACTOR X	This gene encodes the vitamin K-dependent coagulation factor X of the blood coagulation cascade. This factor undergoes multiple processing steps before its preproprotein is converted to a mature two-chain form by the excision of the tripeptide RKR. Two chains of the factor are held together by 1 or more disulfide bonds; the light chain contains 2 EGF-like domains, while the heavy chain contains t…	0	0	0	0	0	0	0	0	0	0
E0065	PIGR	POLYMERIC IMMUNOGLOBULIN RECEPTOR	The poly-Ig receptor is expressed on several glandular epithelia including those of liver and breast. It mediates transcellular transport of polymeric immunoglobulin molecules. It is a member of the immunoglobulin superfamily (Hood et al., 1985). The receptor has 5 units with homology to the variable (V) units of immunoglobulins and a transmembrane region, which also has some homology to certain …	0	0	0	0	0	0	0	0	0	0
E0066	CCL11	CHEMOKINE (C-C MOTIF) LIGAND 11	This gene is one of several Cys-Cys (CC) cytokine genes clustered on the q-arm of chromosome 17. Cytokines are a family of secreted proteins involved in immunoregulatory and inflammatory processes. The CC cytokines are proteins characterized by two adjacent cysteines. The cytokine encoded by this gene displays chemotactic activity for eosinophils, but not mononuclear cells or neutrophils. This eo…	1	1	0	0	0	0	0	0	0	0
E0067	RGS1	REGULATOR OF G-PROTEIN SIGNALLING 1	This gene encodes a member of the regulator of G-protein signalling family. This protein is located on the cytosolic side of the plasma membrane and contains a conserved, 120 amino acid motif called the RGS domain. The protein attenuates the signalling activity of G-proteins by binding to activated, GTP-bound G alpha subunits and acting as a GTPase activating protein (GAP), increasing the rate of…	0	0	0	0	1	1	0	1	0	0
E0068	ALOX15	ARACHIDONATE 15-LIPOXYGENASE	0	0	0	0	0	0	0	0	0	0	0
E0069	FCGR2B	FC FRAGMENT OF IGG, LOW AFFINITY IIB, RECEPTOR (CD32)	0	1	1	0	0	0	0	0	0	0	0
E0070	GATM	GLYCINE AMIDINOTRANSFERASE (L-ARGININE:GLYCINE AMIDINOTRANSFERASE)	0	0	0	0	0	0	0	0	0	0	0
E0071	AGR2	ANTERIOR GRADIENT 2 HOMOLOG (XENOPUS LAEVIS)	0	0	0	0	0	0	0	0	0	0	0
E0072	ATP2A1	ATPASE, CA++ TRANSPORTING, CARDIAC MUSCLE, FAST TWITCH 1	This gene encodes one of the SERCA Ca(2+)-ATPases, which are intracellular pumps located in the sarcoplasmic or endoplasmic reticula of muscle cells. This enzyme catalyzes the hydrolysis of ATP coupled with the translocation of calcium from the cytosol to the sarcoplasmic reticulum lumen, and is involved in muscular excitation and contraction. Mutations in this gene cause some autosomal recessive…	0	0	0	0	0	0	0	0	0	0
E0073	MUC5AC	MUCIN 5, SUBTYPES A AND C, TRACHEOBRONCHIAL/GASTRIC	0	0	0	0	0	0	0	0	0	0	0
E0074	C1QB	COMPLEMENT COMPONENT 1, Q SUBCOMPONENT, B CHAIN	This gene encodes a major constituent of the human complement subcomponent C1q. C1q associates with C1r and C1s in order to yield the first component of the serum complement system. Deficiency of C1q has been associated with lupus erythematosus and glomerulonephritis. C1q is composed of 18 polypeptide chains: six A-chains, six B-chains, and six C-chains. Each chain contains a collagen-like region…	1	0	0	0	0	0	0	0	0	0
E0075	GUCA1A	GUANYLATE CYCLASE ACTIVATOR 1A (RETINA)	0	0	0	0	0	0	0	0	0	0	0
E0076	CD72	CD72 ANTIGEN	0	0	0	0	0	0	0	0	0	0	0
E0077	HAL	HISTIDINE AMMONIA-LYASE	Histidine ammonia-lyase is a cytosolic enzyme catalyzing the first reaction in histidine catabolism, the nonoxidative deamination of L-histidine to trans-urocanic acid. Histidine ammonia-lyase defects cause histidinemia which is characterized by increased histidine and histamine and decreased urocanic acid in body fluids,	0	0	0	0	0	0	0	0	0	0
E0078	CAPG	CAPPING PROTEIN (ACTIN FILAMENT), GELSOLIN-LIKE	This gene encodes a member of the gelsolin/villin family of actin-regulatory proteins. The encoded protein reversibly blocks the barbed ends of F-actin filaments in a Ca2+ and phosphoinositide-regulated manner, but does not sever preformed actin filaments. By capping the barbed ends of actin filaments, the encoded protein contributes to the control of actin-based motility in non-muscle cells. Alt…	0	0	0	0	0	0	0	0	0	1
E0079	PSAP	PROSAPOSIN (VARIANT GAUCHER DISEASE AND VARIANT METACHROMATIC LEUKODYSTROPHY)	Prosaposin is a 511-amino acid glycoprotein which is a precursor for 4 saposins that are designated A, B, C, and D (Morimoto et al., 1989). Each domain of the precursor protein is approximately 80 amino acid residues long; has nearly identical placement of cysteine residues, glycosylation sites, and helicoregions; and is flanked by proteolytic cleavage sites. Proteolytic cleavage of prosaposin at…	0	0	0	0	0	0	0	0	0	0
E0080	CTSS	CATHEPSIN S	The protein encoded by this gene, a member of the peptidase C1 family, is a lysosomal cysteine proteinase that may participate in the degradation of antigenic proteins to peptides for presentation on MHC class II molecules. The encoded protein can function as an elastase over a broad pH range in alveolar macrophages. Transcript variants utilizing alternative polyadenylation signals exist for this…	0	0	0	0	1	0	0	0	0	0
E0081	C1QA	COMPLEMENT COMPONENT 1, Q SUBCOMPONENT, A CHAIN	This gene encodes a major constituent of the human complement subcomponent C1q. C1q associates with C1r and C1s in order to yield the first component of the serum complement system. Deficiency of C1q has been associated with lupus erythematosus and glomerulonephritis. C1q is composed of 18 polypeptide chains: six A-chains, six B-chains, and six C-chains. Each chain contains a collagen-like region…	1	0	0	0	0	0	0	0	0	0
E0082	C3AR1	COMPLEMENT COMPONENT 3A RECEPTOR 1	0	1	0	0	0	1	0	0	0	0	0
E0083	EMR1	EGF-LIKE MODULE CONTAINING, MUCIN-LIKE, HORMONE RECEPTOR-LIKE 1	This gene encodes a protein that has a domain resembling seven transmembrane G protein-coupled hormone receptors (7TM receptors) at its C-terminus. The N-terminus of the encoded protein has six EGF-like modules, separated from the transmembrane segments by a serine/threonine-rich domain, a feature reminiscent of mucin-like, single-span, integral membrane glycoproteins with adhesive properties.,	0	0	0	0	1	0	0	0	0	0
E0084	LST1	LEUKOCYTE-SPECIFIC TRANSCRIPT 1	0	1	0	0	0	0	0	0	0	0	1
E0085	PTPRC	PROTEIN TYROSINE PHOSPHATASE, RECEPTOR TYPE, C	The protein encoded by this gene is a member of the protein tyrosine phosphatase (PTP) family. PTPs are known to be signaling molecules that regulate a variety of cellular processes including cell growth, differentiation, mitotic cycle, and oncogenic transformation. This PTP contains an extracellular domain, a single transmembrane segment and two tandem intracytoplasmic catalytic domains, and thu…	1	0	1	0	0	0	0	0	0	1
E0086	ITGAM	INTEGRIN, ALPHA M (COMPLEMENT COMPONENT 3 RECEPTOR 3 SUBUNIT)	This gene encodes the integrin alpha M chain. Integrins are heterodimeric integral membrane proteins composed of an alpha chain and a beta chain. This I-domain containing alpha integrin combines with the beta 2 chain (ITGB2) to form a leukocyte-specific integrin referred to as macrophage receptor 1 ('Mac-1'), or inactivated-C3b (iC3b) receptor 3 ('CR3'). The alpha M beta 2 integrin is important i…	1	1	0	0	0	0	0	0	0	0
E0087	SFPI1	SFFV PROVIRAL INTEGRATION 1	0	1	0	0	0	0	0	0	0	0	1
E0088	VAV1	VAV 1 ONCOGENE	The protein encoded by this proto-oncogene is a member of the Dbl family of guanine nucleotide exchange factors (GEF) for the Rho family of GTP binding proteins. The protein is important in hematopoiesis, playing a role in T-cell and B-cell development and activation. This particular GEF has been identified as the specific binding partner of Nef proteins from HIV-1. Coexpression and binding of th…	1	0	1	0	0	0	0	0	0	1
E0089	LCP2	LYMPHOCYTE CYTOSOLIC PROTEIN 2 (SH2 DOMAIN CONTAINING LEUKOCYTE PROTEIN OF 76KDA)	SLP-76 was originally identified as a substrate of the ZAP-70 protein tyrosine kinase following T cell receptor (TCR) ligation in the leukemic T cell line Jurkat. The SLP-76 locus has been localized to human chromosome 5q33 and the gene structure has been partially characterized in mice. The human and murine cDNAs both encode 533 amino acid proteins that are 72% identical and comprised of three m…	1	0	0	0	1	1	0	0	0	0
E0090	PIM1	PIM-1 ONCOGENE	The protooncogene PIM1 encodes a protein kinase upregulated in prostate cancer.[supplied by OMIM],	0	0	0	0	1	1	0	0	0	0
E0091	LGALS3BP	LECTIN, GALACTOSIDE-BINDING, SOLUBLE, 3 BINDING PROTEIN	The galectins are a family of beta-galactoside-binding proteins implicated in modulating cell-cell and cell-matrix interactions. LGALS3BP has been found elevated in the serum of patients with cancer and in those infected by the human immunodeficiency virus (HIV). It appears to be implicated in immune response associated with natural killer (NK) and lymphokine-activated killer (LAK) cell cytotoxic…	0	0	0	0	1	1	0	0	0	0
E0092	APOBEC1	APOLIPOPROTEIN B MRNA EDITING ENZYME, CATALYTIC POLYPEPTIDE 1	This gene encodes a member of the cytidine deaminase enzyme family. The encoded protein forms a multiple-protein editing holoenzyme with APOBEC1 complementation factor (ACF) and APOBEC1 stimulating protein (ASP). This holoenzyme is involved in the editing of C-to-U nucleotide bases in apolipoprotein B and neurofibromatosis-1 mRNAs. Multiple alternatively spliced transcript variants that encode di…	0	0	0	0	0	0	0	0	0	0
E0093	CD53	CD53 ANTIGEN	The protein encoded by this gene is a member of the transmembrane 4 superfamily, also known as the tetraspanin family. Most of these members are cell-surface proteins that are characterized by the presence of four hydrophobic domains. The proteins mediate signal transduction events that play a role in the regulation of cell development, activation, growth and motility. This encoded protein is a c…	0	0	0	0	1	0	0	0	0	0
E0094	SLC11A1	SOLUTE CARRIER FAMILY 11 (PROTON-COUPLED DIVALENT METAL ION TRANSPORTERS), MEMBER 1	0	0	0	0	0	0	0	0	0	0	0
E0095	NINJ1	NINJURIN 1	0	0	0	0	0	1	1	1	0	0	1
E0096	HCLS1	HEMATOPOIETIC CELL-SPECIFIC LYN SUBSTRATE 1	0	0	0	0	0	0	0	0	0	0	0
E0097	TCIRG1	T-CELL, IMMUNE REGULATOR 1, ATPASE, H+ TRANSPORTING, LYSOSOMAL V0 SUBUNIT A3	Through alternate splicing, this gene encodes two proteins with similarity to subunits of the vacuolar ATPase (V-ATPase) but the encoded proteins seem to have different functions. V-ATPase is a multisubunit enzyme that mediates acidification of eukaryotic intracellular organelles. V-ATPase dependent organelle acidification is necessary for such intracellular processes as protein sorting, zymogen …	0	0	0	0	0	0	0	0	0	0
E0098	CHI3L1	CHITINASE 3-LIKE 1 (CARTILAGE GLYCOPROTEIN-39)	0	0	0	0	0	0	0	0	0	0	0
E0099	CYP7B1	CYTOCHROME P450, FAMILY 7, SUBFAMILY B, POLYPEPTIDE 1	This gene encodes a member of the cytochrome P450 superfamily of enzymes. The cytochrome P450 proteins are monooxygenases which catalyze many reactions involved in drug metabolism and synthesis of cholesterol, steroids and other lipids. This endoplasmic reticulum membrane protein catalyzes the first reaction in the cholesterol catabolic pathway of extrahepatic tissues, which converts cholesterol …	0	0	0	0	0	0	0	0	0	0
			Total for	Immune response	Inflammatory response	Cell cycle	Mitotic cell cycle	Jenner & Young	Huang et al	Nau et al	Boldrick et al	Interferon activated	Development
			Subset A (50genes)	19	4	0	0	21	18	5	0	17	4
			Subset B (182genes)	32	7	19	1	59	36	24	19	5	40
			Subset C (23genes)	18	13	2	0	11	12	7	4	4	3
			Subset D (29genes)	1	1	12	8	1	0	0	0	0	7
			Subset E (99genes)	30	15	6	0	28	16	6	7	1	18
