# Supplementary material for: Identification of a Common Gene Expression Response in Different Lung Inflammatory Diseases in Rodents and Macaques
Source: PLoS One. 2008 Jul 9;3(7):e2596. doi: 10.1371/journal.pone.0002596 (PMC2442866; doi:10.1371/journal.pone.0002596)
Supplement: Dataset S2 — Genes involved in the common down-regulated infection response (0.12 MB XLS) [file pone.0002596.s002.xls]

## Sheet: Down
	Gene	Gene Name	ENTREZ_GENE_SUMMARY	Immune response	Inflammatory response	Cell cycle	Mitotic cell cycle	Jenner & Young	Huang et al	Nau et al	Boldrick et al	Interferon activated	Development
Z0001	RABAC1	RAB ACCEPTOR 1 (PRENYLATED)	0	0	0	0	0	0	0	0	0	0	0
Z0002	SCNN1G	SODIUM CHANNEL, NONVOLTAGE-GATED 1, GAMMA	0	0	0	0	0	0	0	0	0	0	0
Z0003	PPAP2A	PHOSPHATIDIC ACID PHOSPHATASE TYPE 2A	The protein encoded by this gene is a member of the phosphatidic acid phosphatase (PAP) family. PAPs convert phosphatidic acid to diacylglycerol, and function in de novo synthesis of glycerolipids as well as in receptor-activated signal transduction mediated by phospholipase D. This protein is an integral membrane glycoprotein, and has been shown to be a surface enzyme that plays an active role i…	0	0	0	0	0	0	0	0	0	0
Z0004	APP	AMYLOID BETA (A4) PRECURSOR PROTEIN (PEPTIDASE NEXIN-II, ALZHEIMER DISEASE)	This gene encodes a cell surface receptor and transmembrane precursor protein that is cleaved by secretases to form a number of peptides. Some of these peptides are secreted and can bind to the acetyltransferase complex APBB1/TIP60 to promote transcriptional activation, while others form the protein basis of the amyloid plaques found in the brains of patients with Alzheimer disease. Mutations in …	0	0	1	1	0	0	0	0	0	1
Z0005	IMPA1	INOSITOL(MYO)-1(OR 4)-MONOPHOSPHATASE 1	0	0	0	0	0	0	0	0	0	0	0
Z0006	GMFB	GLIA MATURATION FACTOR, BETA	0	0	0	0	0	0	0	0	0	0	0
Z0007	CD81	CD81 ANTIGEN (TARGET OF ANTIPROLIFERATIVE ANTIBODY 1)	The protein encoded by this gene is a member of the transmembrane 4 superfamily, also known as the tetraspanin family. Most of these members are cell-surface proteins that are characterized by the presence of four hydrophobic domains. The proteins mediate signal transduction events that play a role in the regulation of cell development, activation, growth and motility. This encoded protein is a c…	1	0	0	0	0	0	0	0	0	1
Z0008	SURF1	SURFEIT 1	This gene encodes a protein localized to the inner mitochondrial membrane and thought to be involved in the biogenesis of the cytochrome c oxidase complex. The protein is a member of the SURF1 family, which includes the related yeast protein SHY1 and rickettsial protein RP733. The gene is located in the surfeit gene cluster, a group of very tightly linked genes that do not share sequence similari…	0	0	0	0	0	0	0	0	0	0
Z0009	EIF4A2	EUKARYOTIC TRANSLATION INITIATION FACTOR 4A, ISOFORM 2	0	0	0	0	0	0	0	0	0	0	0
Z0010	NEDD4	NEURAL PRECURSOR CELL EXPRESSED, DEVELOPMENTALLY DOWN-REGULATED 4	0	0	0	0	0	0	0	0	0	0	0
Z0011	PPP3CA	PROTEIN PHOSPHATASE 3 (FORMERLY 2B), CATALYTIC SUBUNIT, ALPHA ISOFORM (CALCINEURIN A ALPHA)	0	0	0	1	1	0	0	0	0	0	0
Z0012	JUB	JUB, AJUBA HOMOLOG (XENOPUS LAEVIS)	0	0	0	0	0	0	0	0	0	0	1
Z0013	TM7SF3	TRANSMEMBRANE 7 SUPERFAMILY MEMBER 3	0	0	0	0	0	0	0	0	0	0	0
Z0014	KLF9	KRUPPEL-LIKE FACTOR 9	The protein encoded by this gene is a transcription factor that binds to GC box elements located in the promoter. Binding of the encoded protein to a single GC box inhibits mRNA expression while binding to tandemly repeated GC box elements activates transcription.,	0	0	0	0	0	0	0	0	0	1
Z0015	TXNIP	THIOREDOXIN INTERACTING PROTEIN	0	0	0	0	0	0	0	0	0	0	0
Z0016	CDH5	CADHERIN 5, TYPE 2, VE-CADHERIN (VASCULAR EPITHELIUM)	This gene is a classical cadherin from the cadherin superfamily and is located in a six-cadherin cluster in a region on the long arm of chromosome 16 that is involved in loss of heterozygosity events in breast and prostate cancer. The encoded protein is a calcium-dependent cell-cell adhesion glycoprotein comprised of five extracellular cadherin repeats, a transmembrane region and a highly conserv…	0	0	0	0	0	0	0	0	0	1
Z0017	NPR3	NATRIURETIC PEPTIDE RECEPTOR C/GUANYLATE CYCLASE C (ATRIONATRIURETIC PEPTIDE RECEPTOR C)	The family of natriuretic peptides (see MIM 108780) elicit a number of vascular, renal, and endocrine effects that are important in the maintenance of blood pressure and extracellular fluid volume. These effects are mediated by specific binding of the peptides to cell surface receptors in the vasculature, kidney, adrenal, and brain.[supplied by OMIM],	0	0	0	0	0	0	0	0	0	0
Z0018	ENG	ENDOGLIN (OSLER-RENDU-WEBER SYNDROME 1)	Endoglin is a homodimeric transmembrane glycoprotein highly expressed by endothelial cells. It is a component of the transforming growth factor beta receptor complex as it binds TGFB1 and TGFB3 with high affinity. Mutations in the endoglin gene produce hereditary hemorrhagic telangiectasia.,	0	0	0	0	0	0	0	0	0	1
Z0019	ID1	INHIBITOR OF DNA BINDING 1, DOMINANT NEGATIVE HELIX-LOOP-HELIX PROTEIN	The protein encoded by this gene is a helix-loop-helix (HLH) protein that can form heterodimers with members of the basic HLH family of transcription factors. The encoded protein has no DNA binding activity and therefore can inhibit the DNA binding and transcriptional activation ability of basic HLH proteins with which it interacts. This protein may play a role in cell growth, senescence, and dif…	0	0	0	0	0	0	0	0	0	1
Z0020	COL4A4	COLLAGEN, TYPE IV, ALPHA 4	This gene encodes one of the six subunits of type IV collagen, the major structural component of basement membranes. This particular collagen IV subunit, however, is only found in a subset of basement membranes. Like the other members of the type IV collagen gene family, this gene is organized in a head-to-head conformation with another type IV collagen gene so that each gene pair shares a common…	0	0	0	0	0	0	0	0	0	0
Z0021	DAPK2	DEATH-ASSOCIATED PROTEIN KINASE 2	This gene encodes a protein that belongs to the serine/threonine protein kinase family. This protein contains a N-terminal protein kinase domain followed by a conserved calmodulin-binding domain with significant similarity to that of death-associated protein kinase 1 (DAPK1), a positive regulator of programmed cell death. Overexpression of this gene was shown to induce cell apoptosis. It uses mul…	0	0	0	0	0	0	0	0	0	0
Z0022	OCLN	OCCLUDIN	This gene encodes an integral membrane protein which is located at tight junctions. This protein may be involved in the formation and maintenance of the tight junction. The possibility of several alternatively spliced products has been suggested but the full nature of these products has not been described.,	0	0	0	0	0	0	0	0	0	0
Z0023	SALL2	SAL-LIKE 2 (DROSOPHILA)	0	0	0	0	0	0	0	0	0	0	0
Z0024	ST3GAL3	ST3 BETA-GALACTOSIDE ALPHA-2,3-SIALYLTRANSFERASE 3	The protein encoded by this gene is a type II membrane protein that catalyzes the transfer of sialic acid from CMP-sialic acid to galactose-containing substrates. The encoded protein is normally found in the Golgi apparatus but can be proteolytically processed to a soluble form. This protein is a member of glycosyltransferase family 29. Multiple transcript variants encoding several different isof…	0	0	0	0	0	0	0	0	0	0
Z0025	FBXO21	F-BOX PROTEIN 21	This gene encodes a member of the F-box protein family which is characterized by an approximately 40 amino acid motif, the F-box. The F-box proteins constitute one of the four subunits of ubiquitin protein ligase complex called SCFs (SKP1-cullin-F-box), which function in phosphorylation-dependent ubiquitination. The F-box proteins are divided into 3 classes: Fbws containing WD-40 domains, Fbls co…	0	0	0	0	0	0	0	0	0	0
Z0026	GFRA2	GDNF FAMILY RECEPTOR ALPHA 2	Glial cell line-derived neurotrophic factor (GDNF) and neurturin (NTN) are two structurally related, potent neurotrophic factors that play key roles in the control of neuron survival and differentiation. The protein encoded by this gene is a member of the GDNF receptor family. It is a glycosylphosphatidylinositol(GPI)-linked cell surface receptor for both GDNF and NTN, and mediates activation of …	0	0	0	0	0	0	0	0	0	1
Z0027	RYR2	RYANODINE RECEPTOR 2 (CARDIAC)	0	0	0	0	0	0	0	0	0	0	0
Z0028	ACVRL1	ACTIVIN A RECEPTOR TYPE II-LIKE 1	Activin A receptor, type II-like 1 (also called activin receptor-like kinase 1) is a type I cell-surface receptor for the TGF-beta superfamily of ligands. It shares with other type I receptors a high degree of similarity in serine-threonine kinase subdomains, a glycine- and serine-rich region (called the GS domain) preceding the kinase domain, and a short C-terminal tail. The protein (sometimes t…	0	0	0	0	0	0	0	0	0	0
Z0029	PDE9A	PHOSPHODIESTERASE 9A	The protein encoded by this gene catalyzes the hydrolysis of cAMP and cGMP to their corresponding monophosphates. The encoded protein plays a role in signal transduction by regulating the intracellular concentration of these cyclic nucleotides. Multiple transcript variants encoding several different isoforms have been found for this gene.,	0	0	0	0	0	0	0	0	0	0
Z0030	COX4I2	CYTOCHROME C OXIDASE SUBUNIT IV ISOFORM 2 (LUNG)	Cytochrome c oxidase (COX), the terminal enzyme of the mitochondrial respiratory chain, catalyzes the electron transfer from reduced cytochrome c to oxygen. It is a heteromeric complex consisting of 3 catalytic subunits encoded by mitochondrial genes and multiple structural subunits encoded by nuclear genes. The mitochondrially-encoded subunits function in electron transfer, and the nuclear-encod…	0	0	0	0	0	0	0	0	0	0
Z0031	CHN1	CHIMERIN (CHIMAERIN) 1	0	0	0	0	0	0	0	0	0	0	0
Z0032	PKIA	PROTEIN KINASE (CAMP-DEPENDENT, CATALYTIC) INHIBITOR ALPHA	The protein encoded by this gene is a member of the cAMP-dependent protein kinase (PKA) inhibitor family. This protein was demonstrated to interact with and inhibit the activities of both C alpha and C beta catalytic subunits of the PKA. Alternatively spliced transcript variants encoding the same protein have been reported.,	0	0	0	0	0	0	0	0	0	0
Z0033	SEMA3E	SEMA DOMAIN, IMMUNOGLOBULIN DOMAIN (IG), SHORT BASIC DOMAIN, SECRETED, (SEMAPHORIN) 3E	0	0	0	0	0	0	0	0	0	0	1
Z0034	LAMA3	LAMININ, ALPHA 3	Laminins are basement membrane components thought to mediate the attachment, migration and organization of cells into tissues during embryonic development by interacting with other extracellular matrix components. The protein encoded by this gene is the alpha-3 chain of laminin 5, which is a complex glycoprotein composed of three subunits (alpha, beta, and gamma). Laminin 5 is thought to be invol…	0	0	0	0	0	0	0	0	0	1
Z0035	BMP4	BONE MORPHOGENETIC PROTEIN 4	The protein encoded by this gene is a member of the bone morphogenetic protein family which is part of the transforming growth factor-beta superfamily. The superfamily includes large families of growth and differentiation factors. Bone morphogenetic proteins were originally identified by an ability of demineralized bone extract to induce endochondral osteogenesis in vivo in an extraskeletal site.…	0	0	0	0	0	0	0	0	0	1
Z0036	PJA2	PRAJA 2, RING-H2 MOTIF CONTAINING	0	0	0	0	0	0	0	0	0	0	0
Z0037	SPOCK2	SPARC/OSTEONECTIN, CWCV AND KAZAL-LIKE DOMAINS PROTEOGLYCAN (TESTICAN) 2	Proteoglycans, which consist of a core protein and covalently linked glycosaminoglycans, are components of the extracellular matrix. SPOCK2 encodes a member of a novel Ca(2+)-binding proteoglycan family.[supplied by OMIM],	0	0	0	0	0	0	0	0	0	1
Z0038	EPHB4	EPH RECEPTOR B4	Ephrin receptors and their ligands, the ephrins, mediate numerous developmental processes, particularly in the nervous system. Based on their structures and sequence relationships, ephrins are divided into the ephrin-A (EFNA) class, which are anchored to the membrane by a glycosylphosphatidylinositol linkage, and the ephrin-B (EFNB) class, which are transmembrane proteins. The Eph family of recep…	0	0	0	0	0	0	0	0	0	1
Z0039	CDKL2	CYCLIN-DEPENDENT KINASE-LIKE 2 (CDC2-RELATED KINASE)	This gene product is a member of a large family of CDC2-related serine/threonine protein kinases. It accumulates primarily in the cytoplasm, with a lower level in the nucleus.,	0	0	0	0	0	0	0	0	0	0
Z0040	YAP1	YES-ASSOCIATED PROTEIN 1, 65KDA	This gene encodes the human ortholog of chicken YAP protein which binds to the SH3 domain of the Yes proto-oncogene product. This protein contains a WW domain that is found in various structural, regulatory and signaling molecules in yeast, nematode, and mammals, and may be involved in protein-protein interaction.,	0	0	0	0	0	0	0	0	0	0
Z0041	ICAM2	INTERCELLULAR ADHESION MOLECULE 2	The protein encoded by this gene is a member of the intercellular adhesion molecule (ICAM) family. All ICAM proteins are type I transmembrane glycoproteins, contain 2-9 immunoglobulin-like C2-type domains, and bind to the leukocyte adhesion LFA-1 protein. This protein may play a role in lymphocyte recirculation by blocking LFA-1-dependent cell adhesion. It mediates adhesive interactions important…	0	0	0	0	0	0	0	0	0	0
Z0042	KITL	KIT LIGAND	0	0	0	0	0	0	0	0	0	0	1
Z0043	LEPR	LEPTIN RECEPTOR	Leptin (LEP; MIM 164160), an adipocyte-specific hormone that regulates adipose-tissue mass through hypothalamic effects on satiety and energy expenditure, acts through the leptin receptor (LEPR), a single-transmembrane-domain receptor of the cytokine receptor family.[supplied by OMIM],	0	0	0	0	0	0	0	0	0	0
Z0044	ANGPT1	ANGIOPOIETIN 1	Angiopoietins are proteins with important roles in vascular development and angiogenesis. All angiopoietins bind with similar affinity to an endothelial cell-specific tyrosine-protein kinase receptor. The protein encoded by this gene is a secreted glycoprotein that activates the receptor by inducing its tyrosine phosphorylation. It plays a critical role in mediating reciprocal interactions betwee…	0	0	0	0	0	0	0	0	0	1
Z0045	EPHX2	EPOXIDE HYDROLASE 2, CYTOPLASMIC	This gene encodes a member of the epoxide hydrolase family. The protein, found in both the cytosol and peroxisomes, binds to specific epoxides and converts them to the corresponding dihydrodiols. Mutations in this gene have been associated with familial hypercholesterolemia. Alternate transcriptional splice variants of this gene have been observed but have not been thoroughly characterized.,	0	0	0	0	0	0	0	0	0	0
Z0046	CDH11	CADHERIN 11, TYPE 2, OB-CADHERIN (OSTEOBLAST)	This gene encodes a type II classical cadherin from the cadherin superfamily, integral membrane proteins that mediate calcium-dependent cell-cell adhesion. Mature cadherin proteins are composed of a large N-terminal extracellular domain, a single membrane-spanning domain, and a small, highly conserved C-terminal cytoplasmic domain. Type II (atypical) cadherins are defined based on their lack of a…	0	0	0	0	0	0	0	0	0	0
Z0047	EFNB1	EPHRIN-B1	This gene encodes a member of the ephrin family. The encoded protein is a type I membrane protein and a ligand of Eph-related receptor tyrosine kinases. It may play a role in cell adhesion and function in the development or maintenance of the nervous system.,	1	0	0	0	0	0	0	0	0	1
Z0048	FIGF	C-FOS INDUCED GROWTH FACTOR (VASCULAR ENDOTHELIAL GROWTH FACTOR D)	The protein encoded by this gene is a member of the platelet-derived growth factor/vascular endothelial growth factor (PDGF/VEGF) family and is active in angiogenesis, lymphangiogenesis, and endothelial cell growth. This secreted protein undergoes a complex proteolytic maturation, generating multiple processed forms which bind and activate VEGFR-2 and VEGFR-3 receptors. This protein is structural…	0	0	1	0	0	0	0	0	0	1
Z0049	DPEP1	DIPEPTIDASE 1 (RENAL)	0	0	0	0	0	0	0	0	0	0	0
Z0050	SELENBP1	SELENIUM BINDING PROTEIN 1	This gene product belongs to the selenium-binding protein family. Selenium is an essential nutrient that exhibits potent anticarcinogenic properties, and deficiency of selenium may cause certain neurologic diseases. It has been proposed that the effects of selenium in preventing cancer and neurologic diseases may be mediated by selenium-binding proteins. The exact function of this gene is not kno…	0	0	0	0	0	0	0	0	0	0
Z0051	SCHIP1	SCHWANNOMIN INTERACTING PROTEIN 1	0	0	0	0	0	0	0	0	0	0	0
Z0052	ADRB2	ADRENERGIC, BETA-2-, RECEPTOR, SURFACE	This gene encodes beta-2-adrenergic receptor which is a member of the G protein-coupled receptor superfamily. This receptor is directly associated with one of its ultimate effectors, the class C L-type calcium channel Ca(V)1.2. This receptor-channel complex also contains a G protein, an adenylyl cyclase, cAMP-dependent kinase, and the counterbalancing phosphatase, PP2A. The assembly of the signal…	0	0	0	0	1	0	0	1	0	1
Z0053	SLC9A3R2	SOLUTE CARRIER FAMILY 9 (SODIUM/HYDROGEN EXCHANGER), MEMBER 3 REGULATOR 2	NHE3 (SLC9A3; MIM 182307) is a sodium/hydrogen exchanger in the brush border membrane of the proximal tubule, small intestine, and colon that plays a major role in transepithelial sodium absorption. SLC9A3R2, as well as SLC9A3R1 (MIM 604990) and protein kinase A phosphorylation, may play a role in NHE3 regulation.[supplied by OMIM],	0	0	0	0	0	0	0	0	0	0
Z0054	CYP2S1	CYTOCHROME P450, FAMILY 2, SUBFAMILY S, POLYPEPTIDE 1	This gene encodes a member of the cytochrome P450 superfamily of enzymes. The cytochrome P450 proteins are monooxygenases which catalyze many reactions involved in drug metabolism and synthesis of cholesterol, steroids and other lipids. This protein localizes to the endoplasmic reticulum. In rodents, the homologous protein has been shown to metabolize certain carcinogens; however, the specific fu…	0	0	0	0	0	0	0	0	0	0
Z0055	FLT1	FMS-RELATED TYROSINE KINASE 1 (VASCULAR ENDOTHELIAL GROWTH FACTOR/VASCULAR PERMEABILITY FACTOR RECEPTOR)	Oncogene FLT belongs to the src gene family and is related to oncogene ROS (MIM 165020). Like other members of this family, it shows tyrosine protein kinase activity that is important for the control of cell proliferation and differentiation. The sequence structure of the FLT gene resembles that of the FMS gene (MIM 164770); hence, Yoshida et al. (1987) proposed the name FLT as an acronym for FMS…	0	0	0	0	0	0	0	0	0	1
Z0056	PLOD2	PROCOLLAGEN-LYSINE, 2-OXOGLUTARATE 5-DIOXYGENASE 2	The protein encoded by this gene is a membrane-bound homodimeric enzyme that is localized to the cisternae of the rough endoplasmic reticulum. The enzyme (cofactors iron and ascorbate) catalyzes the hydroxylation of lysyl residues in collagen-like peptides. The resultant hydroxylysyl groups are attachment sites for carbohydrates in collagen and thus are critical for the stability of intermolecula…	0	0	0	0	0	0	0	0	0	0
Z0057	SCNN1B	SODIUM CHANNEL, NONVOLTAGE-GATED 1, BETA (LIDDLE SYNDROME)	0	0	0	0	0	0	0	0	0	0	0
Z0058	BPGM	2,3-BISPHOSPHOGLYCERATE MUTASE	0	0	0	0	0	1	0	0	0	0	0
Z0059	RAPGEF4	RAP GUANINE NUCLEOTIDE EXCHANGE FACTOR (GEF) 4	0	0	0	0	0	0	0	0	0	0	0
Z0060	SEMA6D	KIAA1479 PROTEIN	Semaphorins are a large family, including both secreted and membrane associated proteins, many of which have been implicated as inhibitors or chemorepellents in axon pathfinding, fasciculation and branching, and target selection. All semaphorins possess a semaphorin (Sema) domain and a PSI domain (found in plexins, semaphorins and integrins) in the N-terminal extracellular portion. Additional seq…	0	0	0	0	0	0	0	0	0	1
Z0061	FGF7	FIBROBLAST GROWTH FACTOR 7 (KERATINOCYTE GROWTH FACTOR)	The protein encoded by this gene is a member of the fibroblast growth factor (FGF) family. FGF family members possess broad mitogenic and cell survival activities, and are involved in a variety of biological processes, including embryonic development, cell growth, morphogenesis, tissue repair, tumor growth and invasion. This protein is a potent epithelial cell-specific growth factor, whose mitoge…	0	0	1	0	1	0	0	0	0	0
Z0062	ULK2	UNC-51-LIKE KINASE 2 (C. ELEGANS)	This gene encodes a protein that is similar to a serine/threonine kinase in C. elegans which is involved in axonal elongation. The structure of this protein is similar to the C. elegans protein in that both proteins have an N-terminal kinase domain, a central proline/serine rich (PS) domain, and a C-terminal (C) domain. The gene is located within the Smith-Magenis syndrome region on chromosome 17…	0	0	0	0	0	0	0	0	0	0
Z0063	MYL7	MYOSIN, LIGHT POLYPEPTIDE 7, REGULATORY	0	0	0	0	0	0	0	0	0	0	0
Z0064	MYL4	MYOSIN, LIGHT POLYPEPTIDE 4, ALKALI; ATRIAL, EMBRYONIC	Myosin is a hexameric ATPase cellular motor protein. It is composed of two myosin heavy chains, two nonphosphorylatable myosin alkali light chains, and two phosphorylatable myosin regulatory light chains. This gene encodes a myosin alkali light chain that is found in embryonic muscle and adult atria. Two alternatively spliced transcript variants encoding the same protein have been found for this …	0	0	0	0	0	0	0	0	0	0
Z0065	PLUNC	PALATE, LUNG AND NASAL EPITHELIUM CARCINOMA ASSOCIATED	This gene is the human homolog of murine plunc, and like the mouse gene, is specifically expressed in the upper airways and nasopharyngeal regions. The exact biological function of this gene is not known, however, it has been suggested to be involved in inflammatory responses to irritants in the upper airways. It may also serve as a potential molecular marker for detection of micrometastasis in n…	1	0	0	0	0	0	0	0	0	0
Z0066	IGFBP3	INSULIN-LIKE GROWTH FACTOR BINDING PROTEIN 3	This gene is a member of the insulin-like growth factor binding protein (IGFBP) family and encodes a protein with an IGFBP domain and a thyroglobulin type-I domain. The protein forms a ternary complex with insulin-like growth factor acid-labile subunit (IGFALS) and either insulin-like growth factor (IGF) I or II. In this form, it circulates in the plasma, prolonging the half-life of IGFs and alte…	0	0	0	0	0	0	0	0	0	1
Z0067	PON1	PARAOXONASE 1	0	0	0	0	0	1	0	0	0	0	0
Z0068	EPHX1	EPOXIDE HYDROLASE 1, MICROSOMAL (XENOBIOTIC)	Epoxide hydrolase plays an important role in both the activation and detoxification of exogenous chemicals such as polycyclic aromatic hydrocarbons.,	0	0	0	0	0	0	0	0	0	0
Z0069	GSTA3	GLUTATHIONE S-TRANSFERASE A3	Cytosolic and membrane-bound forms of glutathione S-transferase are encoded by two distinct supergene families. These enzymes are involved in cellular defense against toxic, carcinogenic, and pharmacologically active electrophilic compounds. At present, eight distinct classes of the soluble cytoplasmic mammalian glutathione S-transferases have been identified: alpha, kappa, mu, omega, pi, sigma, …	0	0	0	0	0	0	0	0	0	0
Z0070	CYP2E1	CYTOCHROME P450, FAMILY 2, SUBFAMILY E, POLYPEPTIDE 1	This gene encodes a member of the cytochrome P450 superfamily of enzymes. The cytochrome P450 proteins are monooxygenases which catalyze many reactions involved in drug metabolism and synthesis of cholesterol, steroids and other lipids. This protein localizes to the endoplasmic reticulum and is induced by ethanol, the diabetic state, and starvation. The enzyme metabolizes both endogenous substrat…	0	0	0	0	0	0	0	0	0	0
Z0071	EFNA3	EPHRIN-A3	This gene encodes a member of the ephrin (EPH) family. The ephrins and EPH-related receptors comprise the largest subfamily of receptor protein-tyrosine kinases and have been implicated in mediating developmental events, especially in the nervous system and in erythropoiesis. Based on their structures and sequence relationships, ephrins are divided into the ephrin-A (EFNA) class, which are anchor…	0	0	0	0	0	0	0	0	0	0
Z0072	EDG7	ENDOTHELIAL DIFFERENTIATION, LYSOPHOSPHATIDIC ACID G-PROTEIN-COUPLED RECEPTOR, 7	This gene encodes a member of the G protein-coupled receptor family, as well as the EDG family of proteins. This protein functions as a cellular receptor for lysophosphatidic acid and mediates lysophosphatidic acid-evoked calcium mobilization. This receptor couples predominantly to G(q/11) alpha proteins.,	0	0	0	0	0	0	0	0	0	0
Z0073	FARP2	FERM, RHOGEF AND PLECKSTRIN DOMAIN PROTEIN 2	0	0	0	0	0	0	0	0	0	0	1
Z0074	DGKG	DIACYLGLYCEROL KINASE, GAMMA 90KDA	0	0	0	0	0	0	0	0	0	0	0
Z0075	MYBPC3	MYOSIN BINDING PROTEIN C, CARDIAC	MYBPC3 encodes the cardiac isoform of myosin-binding protein C. Myosin-binding protein C is a myosin-associated protein found in the cross-bridge-bearing zone (C region) of A bands in striated muscle. MYBPC3, the cardiac isoform, is expressed exclussively in heart muscle. Regulatory phosphorylation of the cardiac isoform in vivo by cAMP-dependent protein kinase (PKA) upon adrenergic stimulation m…	0	0	0	0	0	0	0	0	0	0
Z0076	OTC	ORNITHINE CARBAMOYLTRANSFERASE	This nuclear gene encodes a mitochondrial matrix enzyme. Missense, nonsense, and frameshift mutations in this enzyme lead to ornithine transcarbamylase deficiency, which causes hyperammonemia. Since the gene for this enzyme maps close to that for Duchenne muscular dystrophy, it may play a role in that disease also.,	0	0	0	0	0	0	0	0	0	0
Z0077	SLC22A7	SOLUTE CARRIER FAMILY 22 (ORGANIC ANION TRANSPORTER), MEMBER 7	The protein encoded by this gene is involved in the sodium-independent transport and excretion of organic anions, some of which are potentially toxic. The encoded protein is an integral membrane protein and appears to be localized to the basolateral membrane of the kidney. Two transcript variants encoding different isoforms have been found for this gene.,	0	0	0	0	0	0	0	0	0	0
Z0078	ESRRG	ESTROGEN-RELATED RECEPTOR GAMMA	0	0	0	0	0	0	0	0	0	0	1
Z0079	POR	P450 (CYTOCHROME) OXIDOREDUCTASE	Cytochrome P450 oxidoreductase is a flavoprotein that donates electrons to all microsomal P450 enzymes, including the steroidogenic enzymes P450c17 (CYP17A1; MIM 202110), P450c21 (CYP21A2; MIM 201910), and CYP51A1 (MIM 601637) (Miller, 1986).[supplied by OMIM],	0	0	0	0	0	0	0	0	0	0
Z0080	BMX	BMX NON-RECEPTOR TYROSINE KINASE	Tyrosine kinases are either receptor molecules, which contain transmembrane and extracellular domains, or nonreceptor proteins, which are located intracellularly. One family of nonreceptor TKs includes the genes TEC (MIM 600583), TXK (MIM 600058), ITK (MIM 186973), and BTK (MIM 300300). All of these proteins are homologs of the Drosophila Src28 TK and contain an SH3 and SH2 domain upstream of the…	0	0	0	0	0	0	0	0	0	1
Z0081	VSNL1	VISININ-LIKE 1	This gene is a member of the visinin/recoverin subfamily of neuronal calcium sensor proteins. The encoded protein is strongly expressed in granule cells of the cerebellum where it associates with membranes in a calcium-dependent manner and modulates intracellular signaling pathways of the central nervous system by directly or indirectly regulating the activity of adenylyl cyclase. Alternatively s…	0	0	0	0	0	0	0	0	0	0
Z0082	HS3ST1	HEPARAN SULFATE (GLUCOSAMINE) 3-O-SULFOTRANSFERASE 1	Heparan sulfate biosynthetic enzymes are key components in generating a myriad of distinct heparan sulfate fine structures that carry out multiple biologic activities. The enzyme encoded by this gene is a member of the heparan sulfate biosynthetic enzyme family. It possesses both heparan sulfate glucosaminyl 3-O-sulfotransferase activity, anticoagulant heparan sulfate conversion activity, and is …	0	0	0	0	0	0	0	0	0	0
Z0083	ADCY8	ADENYLATE CYCLASE 8 (BRAIN)	Adenylate cyclase is a membrane bound enzyme that catalyses the formation of cyclic AMP from ATP. The enzymatic activity is under the control of several hormones, and different polypeptides participate in the transduction of the signal from the receptor to the catalytic moiety. Stimulatory or inhibitory receptors (Rs and Ri) interact with G proteins (Gs and Gi) that exhibit GTPase activity and th…	0	0	0	0	0	0	0	0	0	0
Z0084	PDE3A	PHOSPHODIESTERASE 3A, CGMP-INHIBITED	0	0	0	0	0	0	0	0	0	0	0
Z0085	TNFRSF19	TUMOR NECROSIS FACTOR RECEPTOR SUPERFAMILY, MEMBER 19	The protein encoded by this gene is a member of the TNF-receptor superfamily. This receptor is highly expressed during embryonic development. It has been shown to interact with TRAF family members, and to activate JNK signaling pathway when overexpressed in cells. This receptor is capable of inducing apoptosis by a caspase-independent mechanism, and it is thought to play an essential role in embr…	0	0	0	0	0	0	0	0	0	0
Z0086	MYO6	MYOSIN VI	Myosin VI is a molecular motor involved in intracellular vesicle and organelle transport. It is one of the so-called unconventional myosins.[supplied by OMIM],	0	0	0	0	0	0	0	0	0	1
Z0087	NDST1	N-DEACETYLASE/N-SULFOTRANSFERASE (HEPARAN GLUCOSAMINYL) 1	0	0	0	0	0	0	0	0	0	0	1
Z0088	BDNF	BRAIN-DERIVED NEUROTROPHIC FACTOR	The protein encoded by this gene is a member of the nerve growth factor family. It is induced by cortical neurons, and is necessary for survival of striatal neurons in the brain. Expression of this gene is reduced in both Alzheimer's and Huntington disease patients. This gene may play a role in the regulation of stress response and in the biology of mood disorders. Multiple transcript variants en…	0	0	0	0	0	0	0	0	0	1
Z0089	LPHN3	LATROPHILIN 3	This gene encodes a member of the latrophilin subfamily of G-protein coupled receptors (GPCR). Latrophilins may function in both cell adhesion and signal transduction. In experiments with non-human species, endogenous proteolytic cleavage within a cysteine-rich GPS (G-protein-coupled-receptor proteolysis site) domain resulted in two subunits (a large extracellular N-terminal cell adhesion subunit…	0	0	0	0	0	0	0	0	0	0
Z0090	MEOX2	MESENCHYME HOMEOBOX 2	This gene encodes a member of a subfamily of non-clustered, diverged, antennapedia-like homeobox-containing genes. The encoded protein may play a role in the regulation of vertebrate limb myogenesis. Mutations in the related mouse protein may be associated with craniofacial and/or skeletal abnormalities, in addition to neurovascular dysfunction observed in Alzheimer's disease.,	0	0	0	0	0	0	0	0	0	1
Z0091	FGF18	FIBROBLAST GROWTH FACTOR 18	The protein encoded by this gene is a member of the fibroblast growth factor (FGF) family. FGF family members possess broad mitogenic and cell survival activities, and are involved in a variety of biological processes, including embryonic development, cell growth, morphogenesis, tissue repair, tumor growth, and invasion. It has been shown in vitro that this protein is able to induce neurite outgr…	0	0	0	0	0	0	0	0	0	1
Z0092	SNAI2	SNAIL HOMOLOG 2 (DROSOPHILA)	This gene encodes a member of the Snail family of C2H2-type zinc finger transcription factors. The encoded protein acts as a transcriptional repressor that binds to E-box motifs and is also likely to repress E-cadherin transcription in breast carcinoma. This protein is involved in epithelial-mesenchymal transitions and has antiapoptotic activity. Mutations in this gene may be associated with spor…	0	0	0	0	0	0	0	0	0	1
Z0093	MEIS1	MEIS1, MYELOID ECOTROPIC VIRAL INTEGRATION SITE 1 HOMOLOG (MOUSE)	Homeobox genes, of which the most well-characterized category is represented by the HOX genes, play a crucial role in normal development. In addition, several homeoproteins are involved in neoplasia. This gene encodes a homeobox protein belonging to the TALE ('three amino acid loop extension') family of homeodomain-containing proteins.,	0	0	0	0	0	0	0	0	0	1
Z0094	VTN	VITRONECTIN	The protein encoded by this gene is a member of the pexin family. It is found in serum and tissues and promotes cell adhesion and spreading, inhibits the membrane-damaging effect of the terminal cytolytic complement pathway, and binds to several serpin serine protease inhibitors. It is a secreted protein and exists in either a single chain form or a clipped, two chain form held together by a disu…	0	0	0	0	0	0	0	0	0	0
Z0095	CRIM1	CYSTEINE RICH TRANSMEMBRANE BMP REGULATOR 1 (CHORDIN-LIKE)	Motor neurons are among the earliest neurons to appear after the commencement of cell patterning and the beginning of cell differentiation. Differentiation occurs in a ventral-to-dorsal gradient and is mediated, at least in part, by the concentration of ventrally expressed sonic hedgehog protein (SHH; MIM 600725). Dorsally expressed factors, such as members of the bone morphogenic protein (e.g., …	0	0	0	0	0	0	0	0	0	1
Z0096	PRKAA2	PROTEIN KINASE, AMP-ACTIVATED, ALPHA 2 CATALYTIC SUBUNIT	The protein encoded by this gene is a catalytic subunit of the AMP-activated protein kinase (AMPK). AMPK is a heterotrimer consisting of an alpha catalytic subunit, and non-catalytic beta and gamma subunits. AMPK is an important energy-sensing enzyme that monitors cellular energy status. In response to cellular metabolic stresses, AMPK is activated, and thus phosphorylates and inactivates acetyl-…	0	0	0	0	0	0	0	0	0	0
Z0097	ADMR	ADRENOMEDULLIN RECEPTOR	Adrenomedullin is a potent vasodilator peptide that exerts major effects on cardiovascular function. This gene encodes a seven-transmembrane protein that belongs to the family 1 of G-protein coupled receptors. Studies of the rat counterpart suggest that the encoded protein may function as a receptor for adrenomedullin.,	0	0	0	0	0	0	0	0	0	0
Z0098	KIF3C	KINESIN FAMILY MEMBER 3C	0	0	0	0	0	0	0	0	0	0	0
Z0099	TNNI3	TROPONIN I TYPE 3 (CARDIAC)	Troponin I (TnI) is one of 3 subunits that form the troponin complex of the thin filaments of striated muscle; see also TNNI1 (MIM 191042). The others are troponin T (TnT; see MIM 191041) and troponin C (TnC; see MIM 191040).[supplied by OMIM],	0	0	0	0	0	0	0	0	0	1
Z0100	EFNA1	EPHRIN-A1	This gene encodes a member of the ephrin (EPH) family. The ephrins and EPH-related receptors comprise the largest subfamily of receptor protein-tyrosine kinases and have been implicated in mediating developmental events, especially in the nervous system and in erythropoiesis. Based on their structures and sequence relationships, ephrins are divided into the ephrin-A (EFNA) class, which are anchor…	0	0	0	0	1	0	0	0	0	1
Z0101	MED6	MEDIATOR OF RNA POLYMERASE II TRANSCRIPTION, SUBUNIT 6 HOMOLOG (YEAST)	0	0	0	0	0	0	0	0	0	0	0
Z0102	ARHGAP5	RHO GTPASE ACTIVATING PROTEIN 5	Rho GTPase activating protein 5 negatively regulates RHO GTPases, a family which may mediate cytoskeleton changes by stimulating the hydrolysis of bound GTP. Two transcript variants encoding different isoforms have been found for this gene.,	0	0	0	0	0	0	0	0	0	1
Z0103	GRB7	GROWTH FACTOR RECEPTOR-BOUND PROTEIN 7	The product of this gene belongs to a small family of adapter proteins that are known to interact with a number of receptor tyrosine kinases and signaling molecules. This gene encodes a growth factor receptor-binding protein that interacts with epidermal growth factor receptor (EGFR) and ephrin receptors. The protein plays a role in the integrin signaling pathway and cell migration by binding wit…	0	0	0	0	0	0	0	0	0	0
Z0104	GSTZ1	GLUTATHIONE TRANSFERASE ZETA 1 (MALEYLACETOACETATE ISOMERASE)	This gene is a member of the glutathione S-transferase (GSTs) super-family which encodes multifunctional enzymes important in the detoxification of electrophilic molecules, including carcinogens, mutagens, and several therapeutic drugs, by conjugation with glutathione. This enzyme also plays a significant role in the catabolism of phenylalanine and tyrosine. Thus defects in this enzyme may lead t…	0	0	0	0	0	0	0	0	0	0
Z0105	NGEF	NEURONAL GUANINE NUCLEOTIDE EXCHANGE FACTOR	0	0	0	0	0	0	0	0	0	0	0
Z0106	XPC	XERODERMA PIGMENTOSUM, COMPLEMENTATION GROUP C	0	0	0	0	0	0	0	0	0	0	0
Z0107	WNT3A	WINGLESS-TYPE MMTV INTEGRATION SITE FAMILY, MEMBER 3A	The WNT gene family consists of structurally related genes which encode secreted signaling proteins. These proteins have been implicated in oncogenesis and in several developmental processes, including regulation of cell fate and patterning during embryogenesis. This gene is a member of the WNT gene family. It encodes a protein which shows 96% amino acid identity to mouse Wnt3A protein, and 84% t…	0	0	0	0	0	0	0	0	0	1
Z0108	DUSP14	DUAL SPECIFICITY PHOSPHATASE 14	In addition to antigen recognition by the T-cell receptor, T-cell activation requires a second signal from a costimulatory receptor, such as CD28 (MIM 186760), which interacts with B7-1 (CD80; MIM 112203) and B7-2 (CD86; MIM 601020) ligands on antigen-presenting cells. CD28 costimulation induces transcription of interleukin-2 (IL2; MIM 147680) and stabilizes newly synthesized IL2 through the acti…	0	0	0	0	0	0	0	0	0	0
Z0109	TTN	TITIN	This gene encodes a large abundant protein of striated muscle. The product of this gene is divided into two regions, a N-terminal I-band and a C-terminal A-band. The I-band, which is the elastic part of the molecule, contains two regions of tandem immunoglobulin domains on either side of a PEVK region that is rich in proline, glutamate, valine and lysine. The A-band, which is thought to act as a …	0	0	0	0	0	0	0	0	0	1
Z0110	OGN	OSTEOGLYCIN (OSTEOINDUCTIVE FACTOR, MIMECAN)	This gene encodes a protein which induces ectopic bone formation in conjunction with transforming growth factor beta. This protein is a small proteoglycan which contains tandem leucine-rich repeats (LRR). The gene expresses three transcript variants which differ only in the 5' UTR.,	0	0	0	0	0	0	0	0	0	0
Z0111	HEY1	HAIRY/ENHANCER-OF-SPLIT RELATED WITH YRPW MOTIF 1	Hairy/enhancer of split-related proteins, such as HEY1, are basic helix-loop-helix (bHLH) transcription factors implicated in cell fate decision and boundary formation. HEY genes are direct transcriptional targets of the Notch (see MIM 600275) signaling pathways in Drosophila and vertebrates.[supplied by OMIM],	0	0	0	0	0	0	0	0	0	1
Z0112	S100G	S100 CALCIUM BINDING PROTEIN G	Calbindin D9K, the vitamin D-dependent calcium-binding protein (CALB3) is a cytosolic protein of molecular weight 9,000 and belongs to a family of calcium-binding proteins that includes calmodulin, parvalbumin, troponin C, and S100 protein. CALB3 is found in the mammalian intestine, placenta, uterus, and kidney. Its exact function is unknown. The intestinal protein is vitamin D-dependent and its …	0	0	0	0	0	0	0	0	0	0
Z0113	GUCY1A3	GUANYLATE CYCLASE 1, SOLUBLE, ALPHA 3	Soluble guanylate cyclase (sGC), a heterodimeric protein consisting of an alpha and a beta subunit, catalyzes the conversion of GTP to the second messenger cGMP and functions as the main receptor for nitric oxide and nitrovasodilator drugs (Zabel et al., 1998).[supplied by OMIM],	0	0	0	0	0	0	0	0	0	0
Z0114	FGF1	FIBROBLAST GROWTH FACTOR 1 (ACIDIC)	The protein encoded by this gene is a member of the fibroblast growth factor (FGF) family. FGF family members possess broad mitogenic and cell survival activities, and are involved in a variety of biological processes, including embryonic development, cell growth, morphogenesis, tissue repair, tumor growth and invasion. This protein functions as a modifier of endothelial cell migration and prolif…	0	0	1	0	0	1	0	0	0	1
Z0115	TIE1	TYROSINE KINASE WITH IMMUNOGLOBULIN-LIKE AND EGF-LIKE DOMAINS 1	0	0	0	0	0	0	0	0	0	0	1
Z0116	CCKAR	CHOLECYSTOKININ A RECEPTOR	This gene encodes a G-protein coupled receptor that binds non-sulfated members of the cholecystokinin (CCK) family of peptide hormones. This receptor is a major physiologic mediator of pancreatic enzyme secretion and smooth muscle contraction of the gallbladder and stomach. In the central and peripheral nervous system this receptor regulates satiety and the release of beta-endorphin and dopamine.,	0	0	0	0	0	0	0	0	0	1
Z0117	FZD2	FRIZZLED HOMOLOG 2 (DROSOPHILA)	Members of the 'frizzled' gene family encode 7-transmembrane domain proteins that are receptors for Wnt signaling proteins. The expression of the FZD2 gene appears to be developmentally regulated, with high levels of expression in fetal kidney and lung and in adult colon and ovary.,	0	0	0	0	0	0	0	0	0	1
Z0118	ARL3	ADP-RIBOSYLATION FACTOR-LIKE 3	ADP-ribosylation factor-like 3 is a member of the ADP-ribosylation factor family of GTP-binding proteins. ARL3 binds guanine nucleotides but lacks ADP-ribosylation factor activity.,	0	0	0	0	0	0	0	0	0	0
Z0119	SLC29A1	SOLUTE CARRIER FAMILY 29 (NUCLEOSIDE TRANSPORTERS), MEMBER 1	0	0	0	0	0	0	0	0	0	0	0
Z0120	CD97	CD97 ANTIGEN	This gene is a member of the EGF-TM7 family of class II seven-span transmembrane (7-TM) molecules, likely encoded by a gene cluster on the short arm of chromosome 19. The encoded product is a glycoprotein that is present on the surface of most activated leukocytes and spans the membrane seven times, which is a defining feature of G protein-coupled receptors. The protein has an extended extracellu…	0	0	0	0	1	1	0	1	0	0
Z0121	NOX4	NADPH OXIDASE 4	Oxygen sensing is essential for homeostasis in all aerobic organisms. A phagocyte-type oxidase, similar to that responsible for the production of large amounts of reactive oxygen species (ROS) in neutrophil granulocytes, with resultant antimicrobial activity, has been postulated to function in the kidney as an oxygen sensor that regulates the synthesis of erythropoietin (EPO; MIM 133170) in the r…	0	0	0	0	0	0	0	0	0	0
Z0122	FXYD1	FXYD DOMAIN CONTAINING ION TRANSPORT REGULATOR 1 (PHOSPHOLEMMAN)	This gene encodes a member of a family of small membrane proteins that share a 35-amino acid signature sequence domain, beginning with the sequence PFXYD and containing 7 invariant and 6 highly conserved amino acids. The approved human gene nomenclature for the family is FXYD-domain containing ion transport regulator. Mouse FXYD5 has been termed RIC (Related to Ion Channel). FXYD2, also known as …	0	0	0	0	0	0	0	0	0	0
Z0123	DPP4	DIPEPTIDYL-PEPTIDASE 4 (CD26, ADENOSINE DEAMINASE COMPLEXING PROTEIN 2)	The protein encoded by this gene is identical to adenosine deaminase complexing protein-2, and to the T-cell activation antigen CD26. It is an intrinsic membrane glycoprotein and a serine exopeptidase that cleaves X-proline dipeptides from the N-terminus of polypeptides.,	0	0	0	0	0	0	0	0	0	0
Z0124	SDC2	SYNDECAN 2 (HEPARAN SULFATE PROTEOGLYCAN 1, CELL SURFACE-ASSOCIATED, FIBROGLYCAN)	The protein encoded by this gene is a transmembrane (type I) heparan sulfate proteoglycan and is a member of the syndecan proteoglycan family. The syndecans mediate cell binding, cell signaling, and cytoskeletal organization and syndecan receptors are required for internalization of the HIV-1 tat protein. The syndecan-2 protein functions as an integral membrane protein and participates in cell pr…	0	0	0	0	0	0	0	1	0	0
Z0125	GSTM2	GLUTATHIONE S-TRANSFERASE M2 (MUSCLE)	Cytosolic and membrane-bound forms of glutathione S-transferase are encoded by two distinct supergene families. At present, eight distinct classes of the soluble cytoplasmic mammalian glutathione S-transferases have been identified: alpha, kappa, mu, omega, pi, sigma, theta and zeta. This gene encodes a glutathione S-transferase that belongs to the mu class. The mu class of enzymes functions in t…	0	0	0	0	0	0	0	0	0	0
Z0126	STXBP1	SYNTAXIN BINDING PROTEIN 1	0	0	0	0	0	0	0	0	0	0	1
Z0127	HOXA5	HOMEOBOX A5	In vertebrates, the genes encoding the class of transcription factors called homeobox genes are found in clusters named A, B, C, and D on four separate chromosomes. Expression of these proteins is spatially and temporally regulated during embryonic development. This gene is part of the A cluster on chromosome 7 and encodes a DNA-binding transcription factor which may regulate gene expression, mor…	0	0	0	0	0	0	0	0	0	1
Z0128	KDR	KINASE INSERT DOMAIN RECEPTOR (A TYPE III RECEPTOR TYROSINE KINASE)	0	0	0	0	0	0	0	0	0	0	1
Z0129	NRN1	NEURITIN 1	This gene is expressed in postmitotic-differentiating neurons of the developmental nervous system and neuronal structures associated with plasticity in the adult. The expression of this gene can be induced by neural activity and neurotrophins. The encoded protein contains a consensus cleavage signal found in glycosylphoshatidylinositol (GPI)-anchored proteins. In vitro assays demonstrated that th…	0	0	0	0	0	0	0	0	0	1
Z0130	MAPT	MICROTUBULE-ASSOCIATED PROTEIN TAU	This gene encodes the microtubule-associated protein tau (MAPT) whose transcript undergoes complex, regulated alternative splicing, giving rise to several mRNA species. MAPT transcripts are differentially expressed in the nervous system, depending on stage of neuronal maturation and neuron type. MAPT gene mutations have been associated with several neurodegenerative disorders such as Alzheimer's …	0	0	0	0	0	0	0	0	0	0
Z0131	GUCY1B3	GUANYLATE CYCLASE 1, SOLUBLE, BETA 3	Soluble guanylate cyclase (sGC), a heterodimeric protein consisting of an alpha and a beta subunit, catalyzes the conversion of GTP to the second messenger cGMP and functions as the main receptor for nitric oxide and nitrovasodilator drugs (Zabel et al., 1998).[supplied by OMIM],	0	0	0	0	0	0	0	0	0	0
Z0132	HSD11B1	HYDROXYSTEROID (11-BETA) DEHYDROGENASE 1	The protein encoded by this gene is a microsomal enzyme that catalyzes the conversion of the stress hormone cortisol to the inactive metabolite cortisone. In addition, the encoded protein can catalyze the reverse reaction, the conversion of cortisone to cortisol. Too much cortisol can lead to central obesity, and a particular variation in this gene has been associated with obesity and insulin res…	0	0	0	0	1	0	1	0	0	1
Z0133	NFIB	NUCLEAR FACTOR I/B	0	0	0	0	0	0	0	0	0	0	1
Z0134	SCN7A	SODIUM CHANNEL, VOLTAGE-GATED, TYPE VII, ALPHA	0	0	0	0	0	0	0	0	0	0	0
Z0135	EFNB2	EPHRIN-B2	This gene encodes a member of the ephrin (EPH) family. The ephrins and EPH-related receptors comprise the largest subfamily of receptor protein-tyrosine kinases and have been implicated in mediating developmental events, especially in the nervous system and in erythropoiesis. Based on their structures and sequence relationships, ephrins are divided into the ephrin-A (EFNA) class, which are anchor…	0	0	0	0	1	0	0	0	0	1
Z0136	LTBP4	LATENT TRANSFORMING GROWTH FACTOR BETA BINDING PROTEIN 4	Transforming growth factor-beta, or TGFB (see TGFB1; MIM 190180), remains biologically latent after secretion, blocked from activity by its N-terminal propeptide (the latency-associated peptide, or LAP). TGFB is activated by its dissociation from LAP. The latent form of TGFB is secreted in association with a latent TGFB-binding protein, or LTBP (see LTBP1; MIM 150390), and assembled into the extr…	0	0	0	0	0	0	0	0	0	1
Z0137	DDC	DOPA DECARBOXYLASE (AROMATIC L-AMINO ACID DECARBOXYLASE)	0	0	0	0	0	0	0	0	0	0	0
Z0138	MID2	MIDLINE 2	The protein encoded by this gene is a member of the tripartite motif (TRIM) family. The TRIM motif includes three zinc-binding domains, a RING, a B-box type 1 and a B-box type 2, and a coiled-coil region. The protein localizes to microtubular structures in the cytoplasm. Its function has not been identified. Alternate splicing of this gene results in two transcript variants encoding different iso…	0	0	0	0	0	0	0	0	0	0
Z0139	PVRL3	POLIOVIRUS RECEPTOR-RELATED 3	Nectins (e.g., PVRL1; MIM 600644) are immunoglobulin-like adhesion molecules that interact with afadin (AF6; MIM 159559). Afadin is an actin filament-binding protein that connects nectins to the actin cytoskeleton. The nectin-afadin system organizes adherens junctions cooperatively with the cadherin (see MIM 192090)-catenin (see MIM 116805) system in epithelial cells.[supplied by OMIM],	0	0	0	0	0	0	0	0	0	0
Z0140	PGRMC1	PROGESTERONE RECEPTOR MEMBRANE COMPONENT 1	Progesterone binding protein is a putative steroid membrane receptor. The protein is expressed predominantly in the liver and kidney.,	0	0	0	0	0	0	0	0	0	0
Z0141	PMP22	PERIPHERAL MYELIN PROTEIN 22	This gene encodes an integral membrane protein that is a major component of myelin in the peripheral nervous system. Various mutations of this gene are causes of Charcot-Marie-Tooth disease Type IA, Dejerine-Sottas syndrome, and hereditary neuropathy with liability to pressure palsies. Alternative splicing of this gene results in three transcript variants that encode the same protein.,	0	0	1	0	0	0	0	0	0	0
Z0142	MYH6	MYOSIN, HEAVY POLYPEPTIDE 6, CARDIAC MUSCLE, ALPHA (CARDIOMYOPATHY, HYPERTROPHIC 1)	0	0	0	0	0	0	0	0	0	0	1
Z0143	CSRP3	CYSTEINE AND GLYCINE-RICH PROTEIN 3 (CARDIAC LIM PROTEIN)	This gene encodes a member of the CSRP family of LIM domain proteins, which may be involved in regulatory processes important for development and cellular differentiation. The LIM/double zinc-finger motif found in this protein is found in a group of proteins with critical functions in gene regulation, cell growth, and somatic differentiation. Mutations in this gene are thought to cause heritable …	0	0	0	0	0	0	0	0	0	1
Z0144	ALDH6A1	ALDEHYDE DEHYDROGENASE 6 FAMILY, MEMBER A1	This protein belongs to the aldehyde dehydrogenases family of proteins. This enzyme plays a role in the valine and pyrimidine catabolic pathways. The product of this gene, a mitochondrial methylmalonate semialdehyde dehydrogenase, catalyzes the irreversible oxidative decarboxylation of malonate and methylmalonate semialdehydes to acetyl- and propionyl-CoA. Methylmalonate semialdehyde dehydrogenas…	0	0	0	0	0	0	0	0	0	0
Z0145	GSTM1	GLUTATHIONE S-TRANSFERASE M1	Cytosolic and membrane-bound forms of glutathione S-transferase are encoded by two distinct supergene families. At present, eight distinct classes of the soluble cytoplasmic mammalian glutathione S-transferases have been identified: alpha, kappa, mu, omega, pi, sigma, theta and zeta. This gene encodes a glutathione S-transferase that belongs to the mu class. The mu class of enzymes functions in t…	0	0	0	0	0	0	0	0	0	0
Z0146	COX6A2	CYTOCHROME C OXIDASE SUBUNIT VIA POLYPEPTIDE 2	Cytochrome c oxidase (COX), the terminal enzyme of the mitochondrial respiratory chain, catalyzes the electron transfer from reduced cytochrome c to oxygen. It is a heteromeric complex consisting of 3 catalytic subunits encoded by mitochondrial genes and multiple structural subunits encoded by nuclear genes. The mitochondrially-encoded subunits function in electron transfer, and the nuclear-encod…	0	0	0	0	0	0	0	0	0	0
Z0147	GRIA1	GLUTAMATE RECEPTOR, IONOTROPIC, AMPA 1	Glutamate receptors are the predominant excitatory neurotransmitter receptors in the mammalian brain and are activated in a variety of normal neurophysiologic processes. These receptors are heteromeric protein complexes with multiple subunits, each possessing transmembrane regions, and all arranged to form a ligand-gated ion channel. The classification of glutamate receptors is based on their act…	0	0	0	0	0	0	0	0	0	0
Z0148	DMD	DYSTROPHIN (MUSCULAR DYSTROPHY, DUCHENNE AND BECKER TYPES)	The dystrophin gene is the largest gene found in nature, measuring 2.4 Mb. The gene was identified through a positional cloning approach, targeted at the isolation of the gene responsible for Duchenne (DMD) and Becker (BMD) Muscular Dystrophies. DMD is a recessive, fatal, X-linked disorder occurring at a frequency of about 1 in 3,500 new-born males. BMD is a milder allelic form. In general, DMD p…	0	0	0	0	0	0	0	0	0	1
Z0149	PTGFR	PROSTAGLANDIN F RECEPTOR (FP)	The protein encoded by this gene is member of the G-protein coupled receptor family. This protein is a receptor for prostaglandin F2-alpha (PGF2-alpha), which is known to be a potent luteolytic agent, and may also be involved in modulating intraocular pressure and smooth muscle contraction in uterus. Knockout studies in mice suggest that the interaction of PGF2-alpha with this receptor may initia…	0	0	0	0	0	0	0	0	0	0
Z0150	GNMT	GLYCINE N-METHYLTRANSFERASE	Glycine N-methyltransferase (GNMT; EC 2.1.1.20) catalyzes the synthesis of N-methylglycine (sarcosine) from glycine using S-adenosylmethionine (AdoMet) as the methyl donor. The enzyme was first described by Blumenstein and Williams (1960) in guinea pig liver. GNMT acts as an enzyme to regulate the ratio of S-adenosylmethionine to S-adenosylhomocysteine (AdoHcy) and participates in the detoxificat…	0	0	0	0	0	0	0	0	0	0
Z0151	PGAM2	PHOSPHOGLYCERATE MUTASE 2 (MUSCLE)	0	0	0	0	0	0	0	0	0	0	0
Z0152	FABP1	FATTY ACID BINDING PROTEIN 1, LIVER	FABP1 encodes the fatty acid binding protein found in liver. Fatty acid binding proteins are a family of small, highly conserved, cytoplasmic proteins that bind long-chain fatty acids and other hydrophobic ligands. FABP1 and FABP6 (the ileal fatty acid binding protein) are also able to bind bile acids. It is thought that FABPs roles include fatty acid uptake, transport, and metabolism.,	0	0	0	0	0	0	0	0	0	0
Z0153	FMO1	FLAVIN CONTAINING MONOOXYGENASE 1	Metabolic N-oxidation of the diet-derived amino-trimethylamine (TMA) is mediated by flavin-containing monooxygenase and is subject to an inherited FMO3 polymorphism in man resulting in a small subpopulation with reduced TMA N-oxidation capacity resulting in fish odor syndrome Trimethylaminuria. Three forms of the enzyme, FMO1 found in fetal liver, FMO2 found in adult liver, and FMO3 are encoded b…	0	0	0	0	0	0	0	0	0	0
Z0154	GSTM3	GLUTATHIONE S-TRANSFERASE M3 (BRAIN)	Cytosolic and membrane-bound forms of glutathione S-transferase are encoded by two distinct supergene families. At present, eight distinct classes of the soluble cytoplasmic mammalian glutathione S-transferases have been identified: alpha, kappa, mu, omega, pi, sigma, theta and zeta. This gene encodes a glutathione S-transferase that belongs to the mu class. The mu class of enzymes functions in t…	0	0	0	0	0	0	0	0	0	0
Z0155	NDRG2	NDRG FAMILY MEMBER 2	This gene is a member of the N-myc downregulated gene family which belongs to the alpha/beta hydrolase superfamily. The protein encoded by this gene is a cytoplasmic protein that may play a role in neurite outgrowth. This gene may be involved in glioblastoma carcinogenesis. Several alternatively spliced transcript variants of this gene have been described, but the full-length nature of some of th…	0	0	0	0	0	0	0	0	0	1
Z0156	FABP3	FATTY ACID BINDING PROTEIN 3, MUSCLE AND HEART (MAMMARY-DERIVED GROWTH INHIBITOR)	The intracellular fatty acid-binding proteins (FABPs) belongs to a multigene family. FABPs are divided into at least three distinct types, namely the hepatic-, intestinal- and cardiac-type. They form 14-15 kDa proteins and are thought to participate in the uptake, intracellular metabolism and/or transport of long-chain fatty acids. They may also be responsible in the modulation of cell growth and…	0	0	0	0	0	0	0	0	0	0
Z0157	TNNT2	TROPONIN T TYPE 2 (CARDIAC)	The protein encoded by this gene is the tropomyosin-binding subunit of the troponin complex, which is located on the thin filament of striated muscles and regulates muscle contraction in response to alterations in intracellular calcium ion concentration. Mutations in this gene have been associated with familial hypertrophic cardiomyopathy as well as with dilated cardiomyopathy. Transcripts for th…	0	0	0	0	0	0	0	0	0	0
			Total for	Immune response	Inflammatory response	Cell cycle	Mitotic cell cycle	Jenner & Young	Huang et al	Nau et al	Boldrick et al	Interferon activated	Development
			Subset Z (157genes)	3	0	6	2	8	2	1	3	0	54
